# Supplementary material
Source: PubMed Central journal article supplement (PMC7511438)
Supplement: NIHMS1621273-supplement-supp_info.pdf [file NIHMS1621273-supplement-supp_info.pdf]

Supplementary Information for:

## Selective Enzymatic Oxidation of Silanes to Silanols

Susanne Bähr,<sup>[a]</sup> Sabine Brinkmann-Chen,<sup>[a]</sup> Marc Garcia-Borrás,<sup>[b,d]</sup> John M. Roberts,<sup>[c]</sup> Dimitris E. Katsoulis,<sup>[c]</sup> Kendall N. Houk,<sup>[b]</sup> and Frances H. Arnold\*<sup>[a]</sup>

\*corresponding author: frances@cheme.caltech.edu

<sup>[a]</sup> Division of Chemistry and Chemical Engineering, California Institute of Technology, 1200 East California Boulevard, Pasadena, CA 91125, USA

<sup>[b]</sup> Department of Chemistry and Biochemistry, University of California, Los Angeles, Los Angeles, CA 90095, USA

<sup>[c]</sup> The Dow Chemical Company, 633 Washington Street, Midland, MI 48674, USA

<sup>[d]</sup> Institut de Química Computacional i Catàlisi (IQCC), Departament de Química, Universitat de Girona, Girona, Spain

### Table of Contents

|                                                             |    |
|-------------------------------------------------------------|----|
| Safety statement.....                                       | 2  |
| Materials and Methods .....                                 | 2  |
| Enzyme-catalyzed hydrosilane oxidation .....                | 7  |
| Gas Chromatography .....                                    | 12 |
| Sequence of primers and variants.....                       | 23 |
| Syntheses and characterization of authentic standards ..... | 26 |
| Computational Methods.....                                  | 51 |
| Supplementary References .....                              | 75 |

## Safety statement

CO is flammable and highly toxic and can be fatal at high doses. It has to be used in a fume hood equipped with a CO detector. The silane reagents are volatile and work with them should be performed with caution (in a fume hood). Other than that, no unexpected or unusually high safety concerns were raised with these methods.

## Materials and Methods

### General

Hydrosilanes **1a**, **1d**, **1i–l**, and silanol **2a** were purchased from commercial vendors. Hydrosilanes **1b**, **1c**, and **1e–h** were synthesized according to procedures previously described.<sup>1</sup> All other chemicals and reagents were obtained from commercial suppliers (Sigma-Aldrich, VWR, Alfa Aesar) and used without further purification. Unless stated otherwise, all reactions were carried out under aerobic conditions. Synthetic reactions were monitored using thin layer chromatography (Merck 60 gel plates) using a UV-lamp for visualization. Silica gel chromatography was performed using AMD Silica Gel 60, 230–400 mesh. <sup>1</sup>H and <sup>13</sup>C NMR were recorded on a Bruker Prodigy 400 MHz instrument. Chemical shifts are reported in parts per million (ppm) downfield from tetramethylsilane and are referenced to the residual solvent resonance as the internal standard (CHCl<sub>3</sub>:  $\delta$  = 7.26 ppm for <sup>1</sup>H NMR and CDCl<sub>3</sub>:  $\delta$  = 77.16 ppm for <sup>13</sup>C NMR). Data are reported as follows: chemical shift, multiplicity (br s = broad singlet, s = singlet, d = doublet, t = triplet, q = quartet, m = multiplet, m<sub>c</sub> = centrosymmetric multiplet), coupling constant (Hz), integration. Electrocompetent *Escherichia coli* (*E. coli*) cells were prepared following the protocol of Sambrook *et al.*<sup>2</sup> Phusion polymerase and *DpnI* were purchased from New England Biolabs (NEB, Ipswich, MA).

### Site-saturation library generation

Site-saturation mutagenesis for amino acid residue 87 was performed using primers containing degenerate codons (NNK; Table S7). Double-site-saturation of amino

acid residues 181 and 184 and residues 327 and 328 was performed using primers bearing degenerate codons (NDT, VHG, TGG) as per the “22 codon trick” (Tables S8 and S9).<sup>3</sup> For each library, two separate PCRs were performed, each using vector-specific primers at the 5' and 3' ends of the sequence (005 and 006, Table S6) and a mutagenic primer. Afterwards, the remaining template was digested with *DpnI*. The two resulting overlapping fragments that contained the base-pair substitutions were then assembled in a second PCR using flanking primers 005 and 006 resulting in the full-length mutated gene. The pET22(b)+ vector (Novagen) was amplified using flanking primers 007 and 008 (Table S6) in a long-range PCR. The PCR conditions were as follows (final concentrations): Phusion HF buffer 1x, 0.2 mM dNTPs each, 0.5  $\mu$ M forward primer, 0.5  $\mu$ M reverse primer, and 0.02 U/ $\mu$ l Phusion polymerase. The purified gene and the pET22(b)+ vector were then assembled using the Gibson assembly protocol.<sup>4</sup> The assembly product was used to transform electrocompetent *E. coli*<sup>®</sup> EXPRESS BL21 (DE3) cells (Lucigen, Middleton, WI) with a Gene Pulser Xcell (Bio-Rad, Hercules, CA). SOC medium<sup>5</sup> (0.75 mL) was added to electroporated cells, and they were incubated for 45 min at 37 °C and 220 rpm before being plated on Luria-Bertani (LB) agar plates (100  $\mu$ g/mL ampicillin). Gel purification was performed with a Zymoclean Gel DNA Recovery Kit (Zymo Research Corp, Irvine, CA). Plasmids were isolated with a QIAprep Spin Miniprep Kit (Qiagen, Hilden, Germany). Generated sequences were sequenced by Laragen using primers T7 and 006 (Table S6).

### **General protein expression protocol**

The following protocol was used for large scale (25–250 mL culture) protein expression. Single colonies of *E. coli* BL21(DE3) cells transformed with the plasmid encoding the protein of interest were picked with sterile toothpicks and grown overnight in Luria-Bertani medium supplemented with ampicillin (100  $\mu$ g/mL final concentration, LB<sub>amp</sub>) at 37 °C and 220 rpm. The preculture was used to inoculate an expression culture (2% v/v preculture) in Terrific Broth supplemented with ampicillin (100  $\mu$ g/mL final concentration, TB<sub>amp</sub>) in an unbaffled 125-mL – 1-L

Erlenmeyer flask. The expression culture was grown at 37 °C and 220 rpm for 3.5 hours and then cooled on ice for 30 min. Isopropyl  $\beta$ -D-glucopyranoside (IPTG, 0.5 mM final concentration), 5-aminolevulinic acid (Ala, 1.0 mM final concentration) as well as FeCl<sub>3</sub> (3.5  $\mu$ M final concentration), and trace metal mix<sup>6</sup> (1000x, 0.6  $\mu$ L per 100 mL culture) were added, and the proteins were expressed at 22 °C and 180 rpm for 20–22 h. Following expression, the cultures were centrifuged at 10 °C and 4,000 g for 10 min. The cell pellets were then resuspended in potassium phosphate buffer (0.1 M, pH 8.0, 5–25 mL).

Expression of P450s in 96-well deep-well plates: Single colonies from *E. coli* BL21(DE3) cells transformed with plasmids of P450 site-saturation mutagenesis libraries were picked from LB<sub>amp</sub> agar plates using sterile toothpicks and grown in 300  $\mu$ L of LB<sub>amp</sub> in 2-mL 96-deep-well plates at 37 °C and 220 rpm (80% humidity) for 12–18 hours. The preculture (50  $\mu$ L) was used to inoculate 0.6 mL of TB<sub>amp</sub> medium in 2-mL 96-well deep-well plates. The expression culture plate was incubated at 37 °C and 220 rpm (80% humidity) for 3.5 hours and then chilled on ice for 30 minutes. TB<sub>amp</sub> (50  $\mu$ L) containing isopropyl  $\beta$ -D-glucopyranoside (IPTG, 0.5 mM final concentration), 5-aminolevulinic acid (Ala, 1.0 mM final concentration) as well as FeCl<sub>3</sub> (3.5  $\mu$ M final concentration), and trace metal mix<sup>6</sup> (1000x, 0.6  $\mu$ L per 100 mL culture) were added, and the proteins were expressed at 22 °C and 220 rpm for 20–24 h. Cells were pelleted at 10 °C and 4,000 g for 10 min.

## Lysis

Cells were lysed by sonication of 5–10 mL resuspended whole cells in potassium phosphate buffer (0.1 M, pH 8) on ice for 1.5 minutes at 30% amplitude (1 second on, 2 second off) using a QSonica Q500 Sonicator and a 1/8-inch tip. The sonicated cell mixture was clarified via centrifugation at 4 °C and 20,000 g for 10 min. The lysate contained the expressed enzymes, and it was used for reactions and protein concentration determination.

### CO binding assay

The CO binding assay was performed with lysate. The lysate (1 mL) and excess sodium dithionite (ca. 1 mg) were added to a cuvette. The absorbance was read at 450 nm and 490 nm. CO was bubbled through the lysate for ca. 1 min and absorbances at 450 nm and 490 nm were reread. Beer's law was used to determine protein concentration ( $A_{450-490} = \epsilon_{450-490} \times l \times c$ ;  $l = 1 \text{ cm}$ ,  $\epsilon_{450-490} = 0.091 \text{ cm}^{-1}\mu\text{M}^{-1}$ ).<sup>7</sup> The concentrations calculated are an average of three samples.

### Reaction screening in 96-well plates

The cell pellets in the 2-mL 96-well plates were resuspended in 390  $\mu\text{L}$  potassium phosphate buffer (0.1 M, pH 8) by vortexing. Dimethylphenylsilane (**1a**, 400 mM in MeCN, 10  $\mu\text{L}$ , 10 mM final concentration) was added to each well. The plates were then immediately covered with a pierceable foil cover (USA Scientific) and shaken at room temperature and 60 rpm for 3–4 h. Afterwards, cyclohexane (900  $\mu\text{L}$ ) was added to each well, the plate was sealed with a silicon mat and vortexed for a few seconds. The phases were separated by centrifugation at 15 °C and 20,000  $g$  for 10 min. Two hundred  $\mu\text{L}$  of the supernatant were moved to a 2-mL glass GC screw top vial with a glass insert, and the mixture was analyzed via GC-FID using method A as specified in the Methods section.

### Small-scale biocatalytic reactions with P450<sub>BM3</sub> variants

Unless stated otherwise, small-scale reactions were set up aerobically on 400- $\mu\text{L}$ -scale. Suspensions of *E. coli* cells expressing the appropriate enzyme or the corresponding lysate were adjusted to the desired protein concentration with potassium phosphate buffer (0.1 M, pH 8) and 386  $\mu\text{L}$  (for whole cell reactions) or 390  $\mu\text{L}$  (for lysate reactions) of the mixture were placed in a 2-mL glass GC screw top vial. A glucose solution (1.0 M in potassium phosphate buffer, 4  $\mu\text{L}$ , for whole cell reactions) or NADPH (3.9 mg, 10 mM final concentration, for lysate reactions) was added, followed by hydrosilane **1a** (400 mM in MeCN, 10  $\mu\text{L}$ , 10 mM final concentration). The vials were then sealed with a cap and moved to a shaker. After

shaking at the indicated temperature and 60 rpm for 4–48 h, cyclohexane (900  $\mu\text{L}$ ) and acetophenone (40 mM in cyclohexane, 20  $\mu\text{L}$ ) as internal standard were added. The mixture was vortexed for a few seconds, and the phases were separated by centrifugation at 15  $^{\circ}\text{C}$  and 20,000  $g$  for 10 min. Two hundred  $\mu\text{L}$  of the organic phase were moved to a 2-mL glass GC screw top vial with a glass insert and analyzed via GC-FID using method A as specified in the Methods section. All reactions were done at least in triplicate (technical replicates).

### **Small-scale biocatalytic reactions with various hydrosilanes**

For silanols **2a–2k**: Pelleted *E. coli* cells expressing P450<sub>SiO<sub>3</sub></sub> from 25–50 mL cultures were resuspended in potassium phosphate buffer (5–10 mL, 0.1 M, pH 8), and 390  $\mu\text{L}$  of the mixture were placed in a 2-mL glass GC screw top vial. The corresponding hydrosilane **1** (200 mM in MeCN, 10  $\mu\text{L}$ , 5.0 mM final concentration) was added, and the vials were then sealed with a cap. After shaking at room temperature and 60 rpm for 24 h, cyclohexane (900  $\mu\text{L}$ ) and acetophenone (40 mM in cyclohexane, 20  $\mu\text{L}$ ) as internal standard were added. The mixture was vortexed for a few seconds and the phases were separated by centrifugation at 15  $^{\circ}\text{C}$  and 20,000  $g$  for 10 min. Two hundred  $\mu\text{L}$  of the organic phase were moved to a 2-mL glass GC screw top vial with a glass insert and analyzed by GC-FID using the methods specified in the Methods section. All reactions were done in triplicate (technical replicates).

For silanol **2l**: Pelleted *E. coli* cells expressing P450<sub>SiO<sub>3</sub></sub> from 25–50 mL cultures were resuspended in potassium phosphate buffer (5–10 mL, 0.1 M, pH 8), and 1 mL of the mixture was placed in a 2-mL glass GC screw top vial. Pentamethyldisiloxane (**1l**, 1.07  $\mu\text{L}$ , 5.0 mM final concentration) was added, and the vials were then sealed with a cap. After shaking at room temperature and 60 rpm for 24 h, diethyl ether (500  $\mu\text{L}$ ) was added. The mixture was vortexed for a few seconds, and the phases were separated by centrifugation at 15  $^{\circ}\text{C}$  and 20,000  $g$  for 10 min. Two hundred  $\mu\text{L}$  of the organic phase were moved to a 2-mL glass GC screw top vial with a glass insert, and acetophenone (40 mM in cyclohexane, 8  $\mu\text{L}$ ) was added as internal standard.

The reaction was analyzed by GC-FID using method D as specified in the Methods section. The reaction was done in triplicates (technical replicates).

## Enzyme-catalyzed hydrosilane oxidation

### Control reactions

Table S1. Control reactions for the formation of dimethylphenylsilanol (**2a**). BSA = bovine serum albumin.

| Entry | Catalyst/Additive                                           | Concentration             | Yield of <b>2a</b> | TTN        |
|-------|-------------------------------------------------------------|---------------------------|--------------------|------------|
| 1     | -                                                           | -                         | 0.2%               | n.a.       |
| 2     | Hemin                                                       | 1 $\mu$ M                 | 0.2%               | n.a.       |
| 3     | BSA                                                         | 1 $\mu$ M                 | 0.2%               | n.a.       |
| 4     | Hemin + BSA                                                 | 1 $\mu$ M/1 $\mu$ M       | 0.2%               | n.a.       |
| 5     | Hemin + Na <sub>2</sub> S <sub>2</sub> O <sub>4</sub>       | 1 $\mu$ M/10 mM           | 0.2%               | n.a.       |
| 6     | Hemin + Na <sub>2</sub> S <sub>2</sub> O <sub>4</sub>       | 10 $\mu$ M/10 mM          | 1.0 $\pm$ 0.1%     | 10 $\pm$ 1 |
| 7     | Hemin + BSA                                                 | 1 $\mu$ M/1 $\mu$ M       | 0.2%               | n.a.       |
| 8     | Hemin + BSA + Na <sub>2</sub> S <sub>2</sub> O <sub>4</sub> | 1 $\mu$ M/1 $\mu$ M/10 mM | 0.2%               | n.a.       |
| 9     | <i>E. coli</i> BL21(DE3)                                    | -                         | 0.3%               | n.a.       |
| 10    | <i>E. coli</i> lysate                                       | -                         | 0.3%               | n.a.       |

Experiments were performed on 400- $\mu$ L scale in potassium phosphate buffer (0.1 M, pH 8) with hydrosilane **1a** (10  $\mu$ L of a 400 mM solution in MeCN, 10 mM final concentration). Hemin was added as a 1 mM suspension/solution in MeCN or DMSO (0.4  $\mu$ L or 4  $\mu$ L), BSA as a 1 mM solution in potassium phosphate buffer (0.4  $\mu$ L), and Na<sub>2</sub>S<sub>2</sub>O<sub>4</sub> (0.9 mg) was added as a solid. Experiments to determine *E. coli* cell and lysate background reactions were performed with *E. coli*® EXPRESS BL21(DE3) cells containing a pET22b(+) plasmid encoding a variant of tryptophane

synthase subunit B from *thermotoga maritima* (uniprot P50909) as a control. Lysis was performed as described above. Reactions were performed in triplicate, and TTNs reported are the average of three experiments. n.a. = not applicable.

### Catalytic performance of P450<sub>BM3</sub> variants

Table S2. Evolutionary lineage for the oxidation of **1a**.

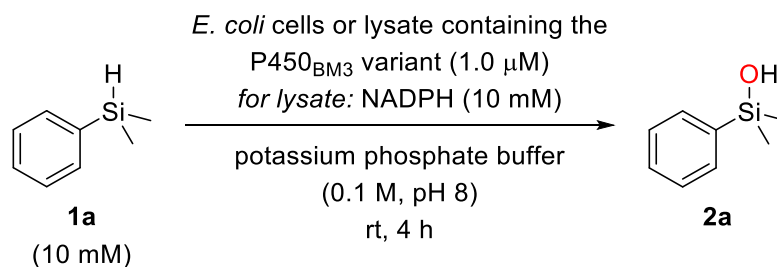

| Entry          | Variant (Mutations)                               | Conditions                            | Yield of <b>2a</b> | TTN        |
|----------------|---------------------------------------------------|---------------------------------------|--------------------|------------|
| 1 <sup>a</sup> |                                                   | whole cells                           | 2.1 ± 0.3%         | 210 ± 25   |
| 2              | P450 <sub>BM3</sub> WT                            | whole cells, anaerobic <sup>b</sup>   | 0.2%               | n.a.       |
| 3              |                                                   | whole cells, anaerobic <sup>b,c</sup> | 0.2%               | n.a.       |
| 4 <sup>a</sup> | P450 <sub>SiOx1</sub> (F87G)                      | whole cells                           | 3.1 ± 0.1%         | 310 ± 10   |
| 5 <sup>a</sup> | P450 <sub>SiOx2</sub> (F87G, A328L)               | whole cells                           | 8.5 ± 1.3%         | 850 ± 130  |
| 6 <sup>a</sup> | P450 <sub>SiOx3</sub> (F87G, A328L, L181D, A184H) | whole cells                           | 12 ± 2.4%          | 1200 ± 240 |
| 7 <sup>a</sup> | P450 <sub>BM3</sub> WT                            | lysate                                | 18 ± 1.4%          | 1740 ± 140 |
| 8 <sup>a</sup> | P450 <sub>SiOx3</sub>                             | lysate                                | 36 ± 1.5%          | 3620 ± 150 |

Experiments were performed as described above for small-scale biocatalytic reactions with P450<sub>BM3</sub> variants at 1.0 μM protein concentration for 4 h at room temperature. n.a. = not applicable. <sup>a</sup> The average of biological duplicates and triplicate runs is given, six runs in total. <sup>b</sup> The reactions were set up anaerobically in a Coy chamber. <sup>c</sup> An oxygen depletion system was used. Cells were resuspended



in 310  $\mu\text{L}$  potassium phosphate buffer (0.1 M, pH 8), 20  $\mu\text{L}$  of a stock solution containing glucose oxidase (from *Aspergillus niger*, 1,000 U/mL) and catalase (from bovine liver, 14,000 U/mL) in double-distilled water, and 60  $\mu\text{L}$  of a glucose solution (250 mM in potassium phosphate buffer) were added.

### Optimization of reaction conditions

Table S3. Performance of P450<sub>SiOx3</sub> under various reaction conditions.

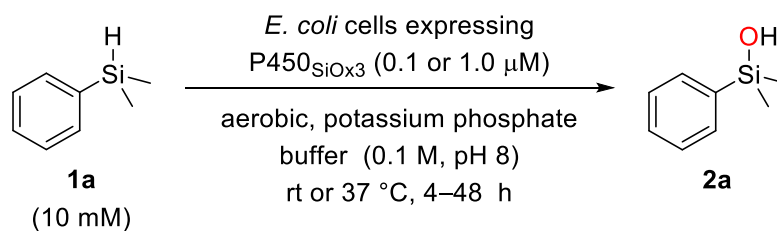

| Entry          | Temperature         | Protein Concentration | Time | Yield of 2a    | TTN              |
|----------------|---------------------|-----------------------|------|----------------|------------------|
| 1 <sup>a</sup> | rt                  | 1.0 $\mu\text{M}$     | 4 h  | 12 $\pm$ 2%    | 1,200 $\pm$ 240  |
| 2              | 37 $^\circ\text{C}$ | 1.0 $\mu\text{M}$     | 4 h  | 18 $\pm$ 3%    | 1,750 $\pm$ 310  |
| 3              | 37 $^\circ\text{C}$ | 1.0 $\mu\text{M}$     | 48 h | 24 $\pm$ 0.6%  | 2,400 $\pm$ 60   |
| 4              | rt                  | 0.1 $\mu\text{M}$     | 4 h  | 1.6 $\pm$ 0.1% | 1,560 $\pm$ 50   |
| 5              | rt                  | 0.1 $\mu\text{M}$     | 24 h | 2.0 $\pm$ 0.1% | 2,020 $\pm$ 120  |
| 6              | rt                  | 0.1 $\mu\text{M}$     | 48 h | 3.1 $\pm$ 0.1% | 3,110 $\pm$ 30   |
| 7              | 37 $^\circ\text{C}$ | 0.1 $\mu\text{M}$     | 4 h  | 2.5 $\pm$ 0.1% | 2,500 $\pm$ 10   |
| 8              | 37 $^\circ\text{C}$ | 0.1 $\mu\text{M}$     | 24 h | 9.9 $\pm$ 0.5% | 9,870 $\pm$ 490  |
| 9              | 37 $^\circ\text{C}$ | 0.1 $\mu\text{M}$     | 48 h | 19 $\pm$ 0.2%  | 19,100 $\pm$ 190 |

Experiments were performed as described earlier for small-scale biocatalytic reactions with P450<sub>BM3</sub> variants. Yields and TTN are given as an average of triplicate runs (technical replicates). <sup>a</sup> See Table S2, entry 6.

### Preparative-scale reaction

Single colonies of *E. coli* BL21(DE3) cells carrying a plasmid encoding P450<sub>SiOx3</sub> were picked with sterile toothpicks and grown overnight in 2 × 5 mL LB<sub>amp</sub> at 37 °C and 220 rpm. Each preculture was used to inoculate an expression culture in TB<sub>amp</sub> (250 mL). The expression cultures were grown at 37 °C and 180 rpm for 3.5 hours and then cooled on ice for 30 min. Isopropyl β-D-glucopyranoside (IPTG, 0.5 mM final concentration), 5-aminolevulinic acid (Ala, 1.0 mM final concentration) as well as FeCl<sub>3</sub> (3.5 μM final concentration) and trace metal mix<sup>6</sup> (1000x, 0.6 μL per 100 mL culture) were added, and the proteins were expressed at 22 °C and 180 rpm overnight. Following expression, the cultures were centrifuged at 10 °C and 4,000 g for 10 min. The cell pellets were then resuspended in potassium phosphate buffer (100 mM, pH 8.0, 25 mL per pellet), and the cell suspensions were combined. The protein concentration in the whole-cell suspension was determined to 8.8 μM by lysis of an aliquot, and the CO binding assay as described earlier. A solution of dimethylphenylsilane (**1a**, 400 mM in MeCN, 625 μL, 0.25 mmol) was added to the 50 mL of the cell suspension and the reaction mixture was shaken at 180 rpm for 3 d at 37 °C. Afterwards, the mixture was extracted with cyclohexane (3 × 300 mL) and the solvent was removed under reduced pressure. Drying *in vacuo* delivered dimethylphenylsilanol (**2a**, 29 mg, 76%) as a clear liquid.

## Substrate Scope

Table S4. Substrate scope reactions.

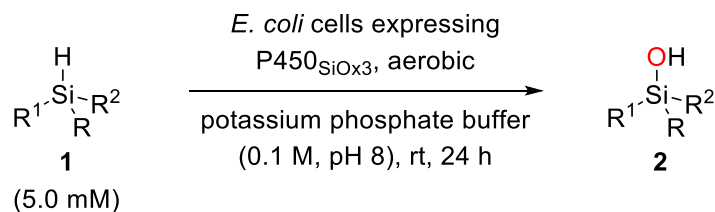

| Silanol               | GC Method | Protein Concentration | Yield      | TTN      |
|-----------------------|-----------|-----------------------|------------|----------|
| <b>2a</b>             | A         | 9.0                   | >99 ± 6.4% | 550 ± 35 |
| <b>2b</b>             | B         | 9.0                   | 94 ± 4.1%  | 520 ± 25 |
| <b>2c</b>             | B         | 8.1                   | 59 ± 1.3%  | 360 ± 10 |
| <b>2d</b>             | B         | 9.0                   | 79 ± 3.7%  | 440 ± 20 |
| <b>2e</b>             | B         | 9.0                   | 58 ± 7.6%  | 320 ± 40 |
| <b>2g</b>             | B         | 8.1                   | 64 ± 2.5%  | 400 ± 15 |
| <b>2i</b>             | E         | 9.0                   | 9 ± 1.6%   | 50 ± 10  |
| <b>2j</b>             | C         | 9.0                   | 17 ± 1.1%  | 95 ± 5   |
| <b>2k</b>             | C         | 9.0                   | 14 ± 0.4%  | 80 ± 5   |
| <b>2l</b>             | D         | 9.0                   | 18 ± 1.5%  | 100 ± 10 |
| <b>2l<sup>a</sup></b> | D         | negative control      | 7 ± 1%     | n.a.     |

Experiments were performed as described earlier for small-scale biocatalytic reactions with various hydrosilanes. Yields and TTN are given as average of triplicate runs (technical replicates). <sup>a</sup>Negative control in potassium phosphate buffer (0.1 M, pH 8) without whole cells added under otherwise identical reaction conditions. n.a. = not applicable.

## Gas Chromatography

GC-FID data were collected on an Agilent 7820A GC system with a DB-WAXetr column (30 m × 0.32 mm, 0.25- $\mu$ m film thickness) using the following parameters: Helium carrier gas, column flow 2.5 mL/min, split ratio 20:1, injection temperature 250 °C, detector temperature 300 °C, and one of the temperature programs specified below.

### Methods

Method A:

|         | Rate (°C/min) | Temperature (°C) | Hold time (min) |
|---------|---------------|------------------|-----------------|
| Initial | --            | 110              | 1               |
| Ramp    | 20            | 120              | 0               |
| Ramp    | 70            | 260              | 2               |

Method B:

|         | Rate (°C/min) | Temperature (°C) | Hold time (min) |
|---------|---------------|------------------|-----------------|
| Initial | --            | 110              | 2               |
| Ramp    | 12            | 140              | 0               |
| Ramp    | 40            | 260              | 1               |

Method C:

|         | Rate (°C/min) | Temperature (°C) | Hold time (min) |
|---------|---------------|------------------|-----------------|
| Initial | --            | 110              | 2               |
| Ramp    | 15            | 140              | 0               |
| Ramp    | 40            | 200              | 0               |

Method D:

|         | Rate (°C/min) | Temperature (°C) | Hold time (min) |
|---------|---------------|------------------|-----------------|
| Initial | --            | 50               | 1               |
| Ramp    | 20            | 60               | 0               |
| Ramp    | 70            | 260              | 0.7             |

## Method E:

|         | Rate (°C/min) | Temperature (°C) | Hold time (min) |
|---------|---------------|------------------|-----------------|
| Initial | --            | 140              | 1               |
| Ramp    | 70            | 260              | 2.3             |

**Calibration curves**

For silanols **2a–k**, a dilution series of the corresponding authentic standard (800 mM–1.56 mM in MeCN) was prepared and 10  $\mu$ L of these solutions were added to 390  $\mu$ L of potassium phosphate buffer (0.1 M, pH = 8), resulting in final product concentrations of 20 mM – 78.1  $\mu$ M. This was followed by the addition of cyclohexane (900  $\mu$ L) and acetophenone (20  $\mu$ L of a 40 mM solution in cyclohexane) as internal standard. The mixtures were vortexed for a few seconds and then centrifuged at 15 °C and 20,000 *g* for 10 min. Two hundred  $\mu$ L of the supernatant were moved to a 2-mL glass GC screw top vial with a glass insert, and the mixture was analyzed via GC-FID. The series were performed in triplicates. For silanol **2l**, a 2 mM solution of the silanol in potassium phosphate buffer (2 mL, 0.1 M, pH 8) was prepared. From this solution, a dilution series was prepared, resulting in 1-mL samples of 1 mM, 0.5 mM, 0.25 mM, 125  $\mu$ M, 62.5  $\mu$ M, and 31.25  $\mu$ M concentrations. Et<sub>2</sub>O (500  $\mu$ L) was added to each of the samples, the mixture was vortexed for a few second and then centrifuged at 4 °C and 20,000 *g* for 10 min. Two hundred  $\mu$ L of the supernatant were moved to a 2-mL glass GC screw top vial with a glass insert, acetophenone (8  $\mu$ L of a 40 mM solution in cyclohexane) was added, and the mixture was analyzed via GC-FID. The series were performed in triplicates.

The standard curves plot the ratio of product area to internal standard area on the GC (y-axis) against product concentration in mM (x-axis).

Dimethylphenylsilanol (**2a**)

## Method A

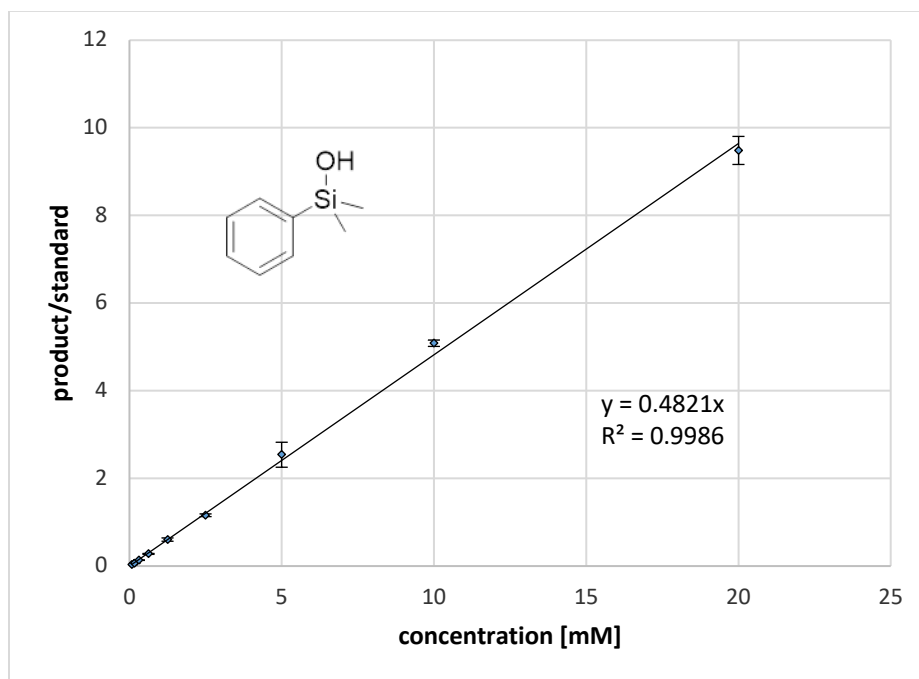Methylethylphenylsilanol (**2b**)

## Method B

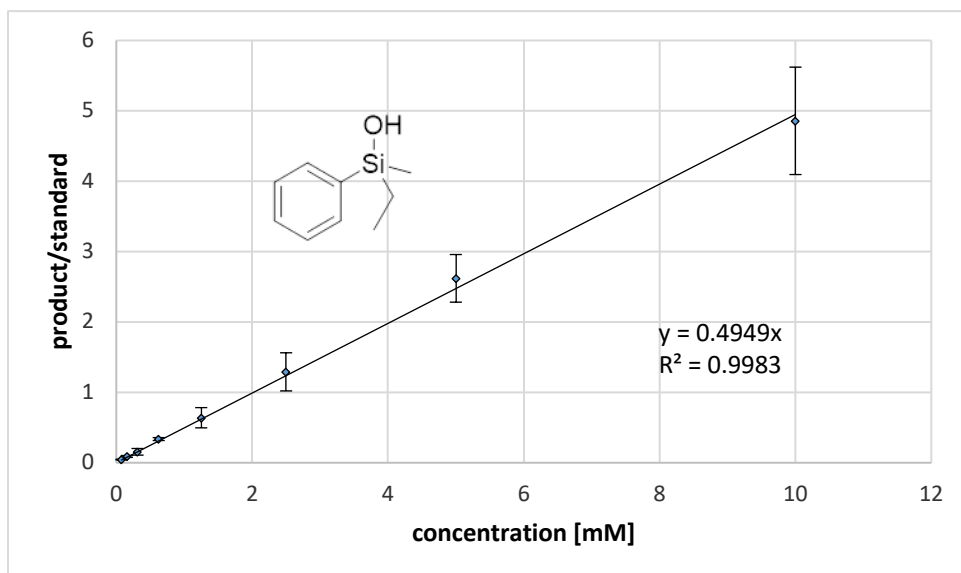

Methyl(phenyl)vinylsilanol (**2c**)  
Method B

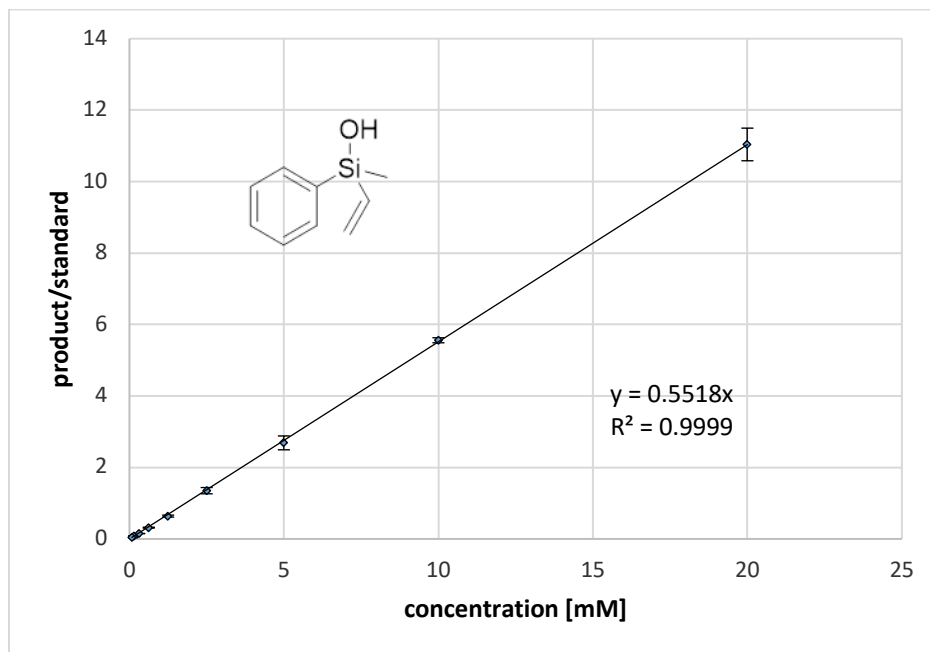

Benzyltrimethylsilanol (**2d**)  
Method B

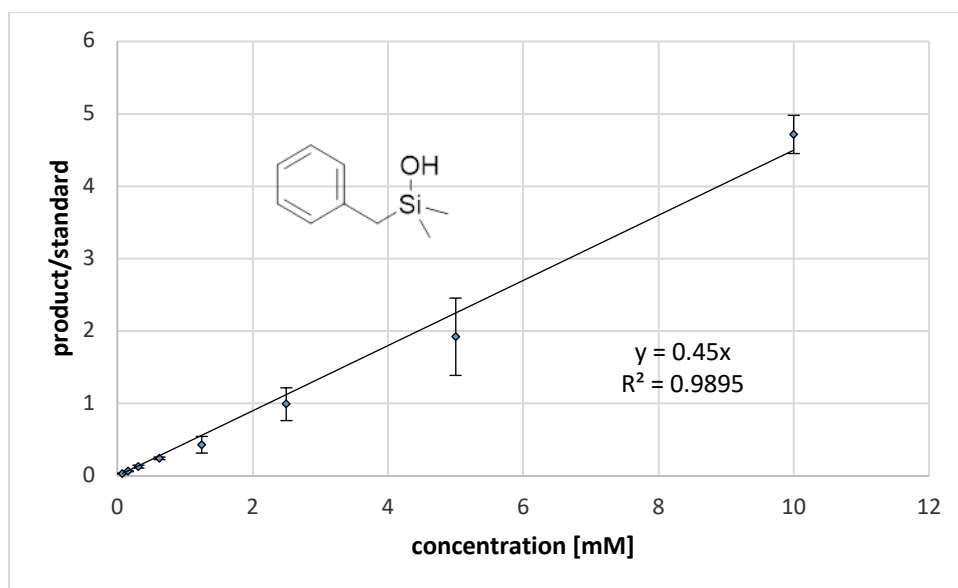

Dimethyl(*p*-tolyl)silanol (**2e**)

Method B

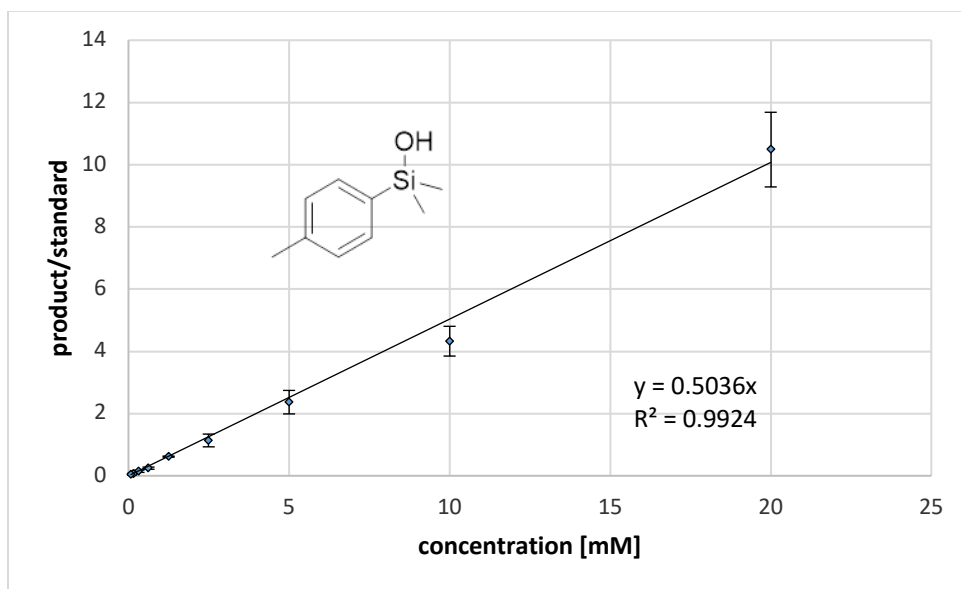Dimethyl(thiophen-2-yl)silanol (**2g**)

Method B

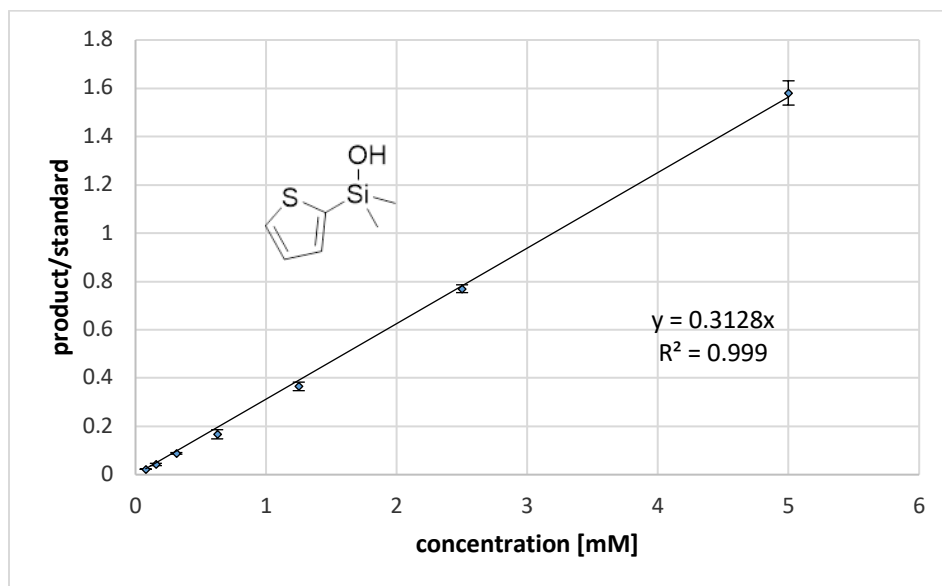



Methyldiphenylsilanol (**2i**)

## Method E

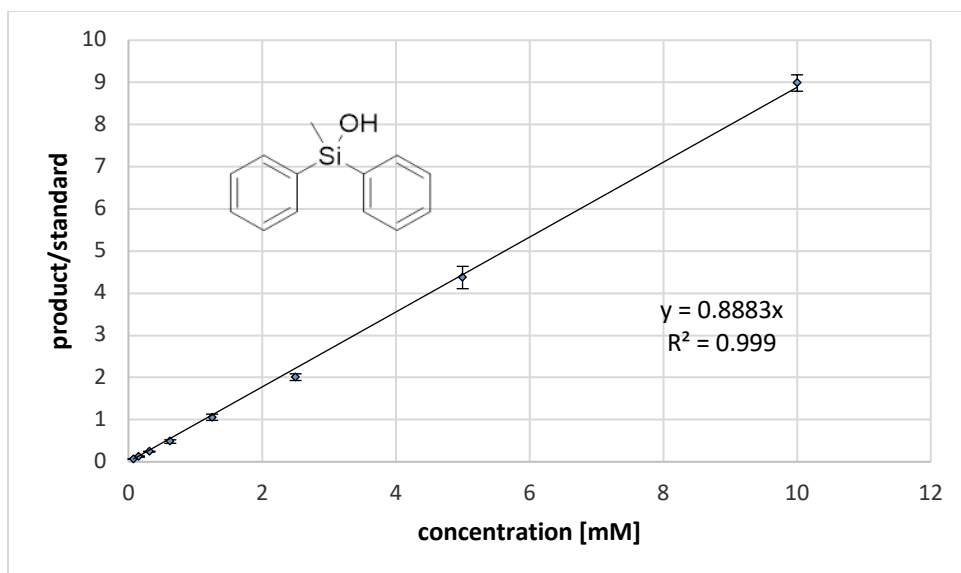Triethylsilanol (**2j**)

## Method C

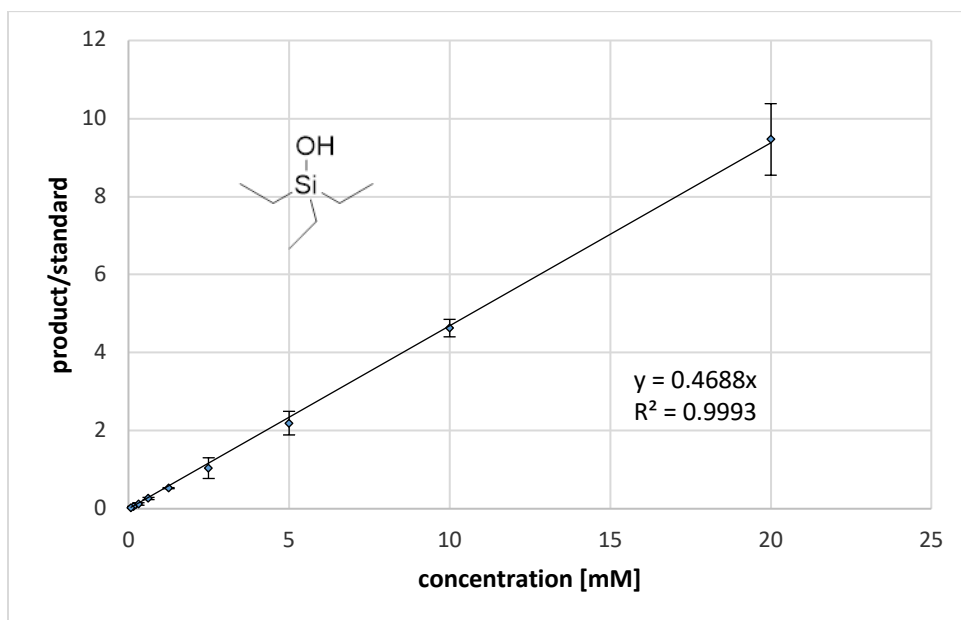

Butyldimethylsilanol (**2k**)

## Method C

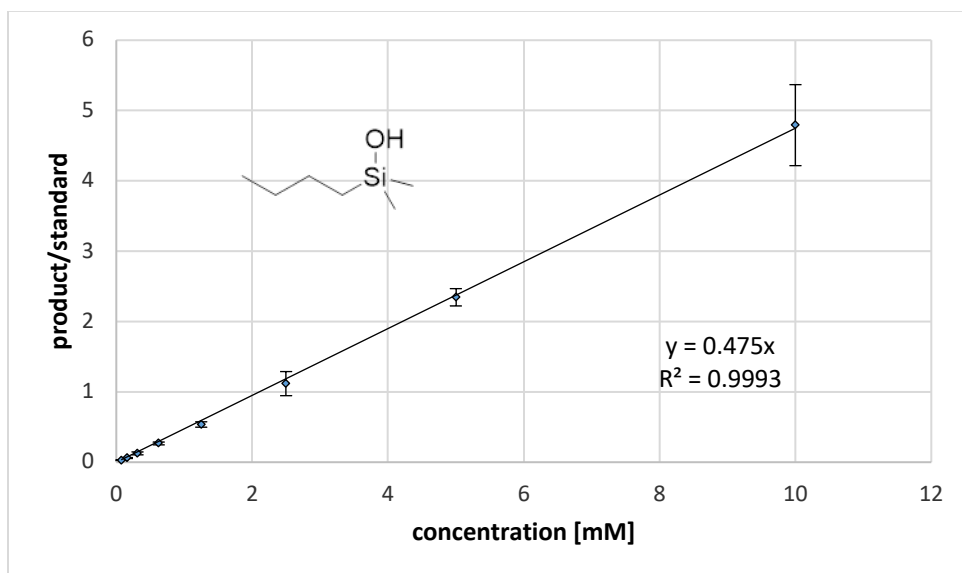Pentamethyldisiloxanol (**2l**)

## Method D

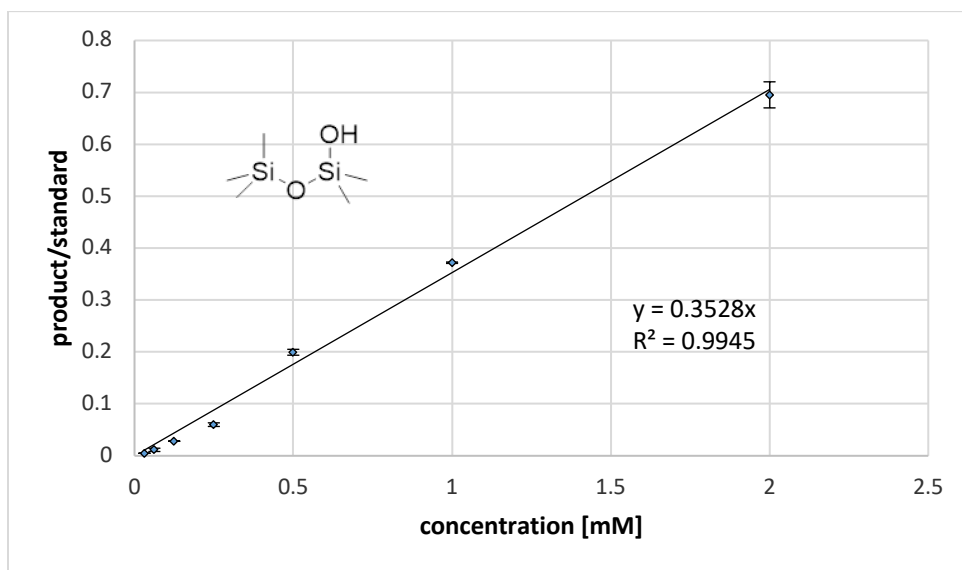

## GC Traces

PhMe<sub>2</sub>SiOH (**2a**) – standard: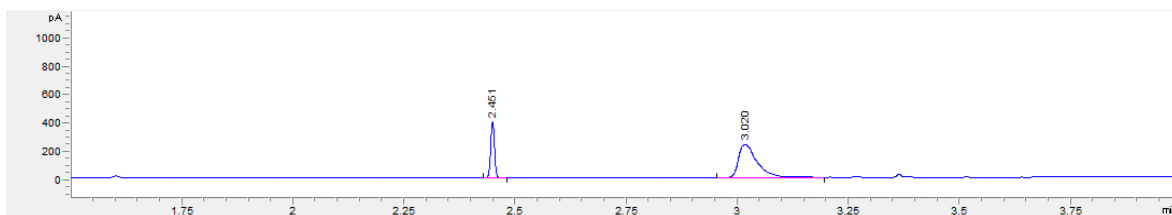PhMe<sub>2</sub>SiOH (**2a**) – enzymatic reaction: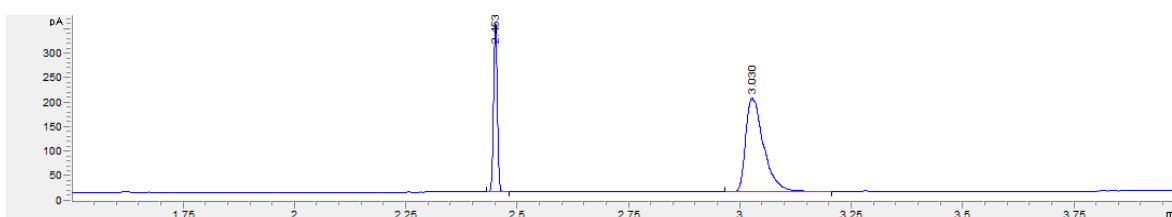Ethyl(methyl)(phenyl)silanol (**2b**) – standard: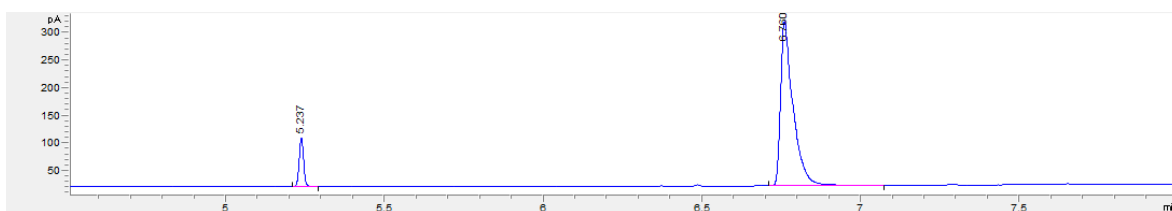Ethyl(methyl)(phenyl)silanol (**2b**) – enzymatic reaction: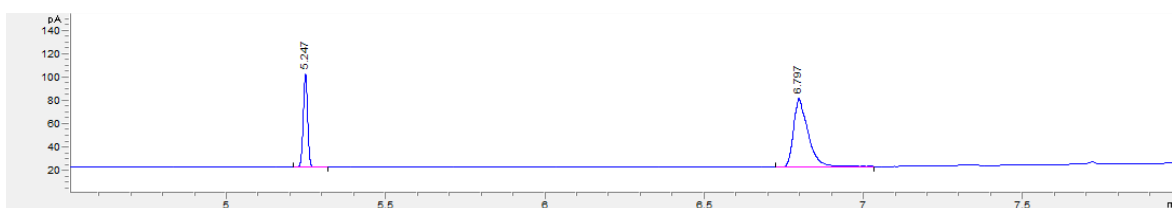Methyl(phenyl)(vinyl)silanol (**2c**) – standard: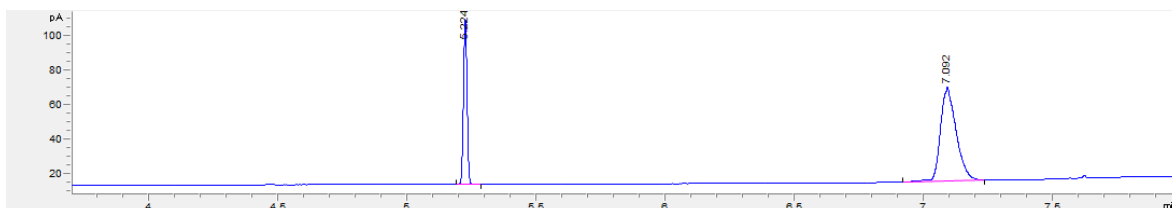

Methyl(phenyl)(vinyl)silanol (**2c**) – enzymatic reaction:

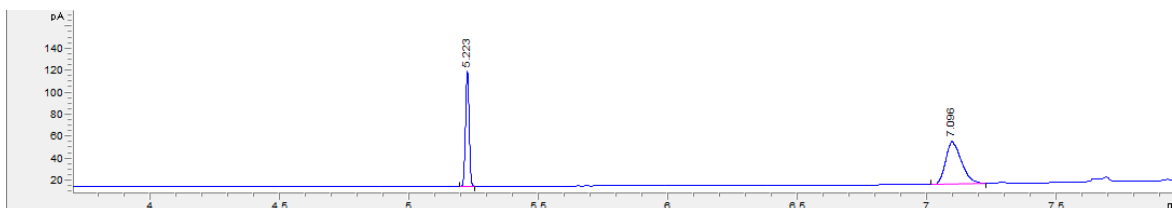

Benzyltrimethylsilanol (**2d**) – standard:

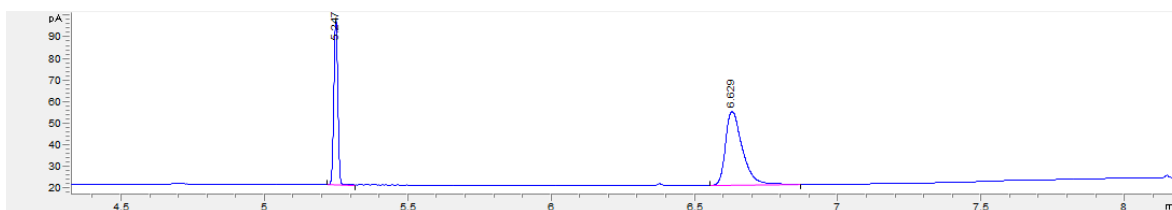

Benzyltrimethylsilanol (**2d**) – enzymatic reaction:

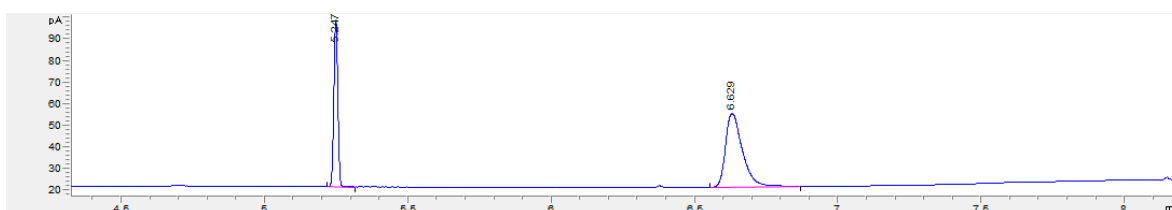

Dimethyl(*p*-tolyl)silanol (**2e**) – standard:

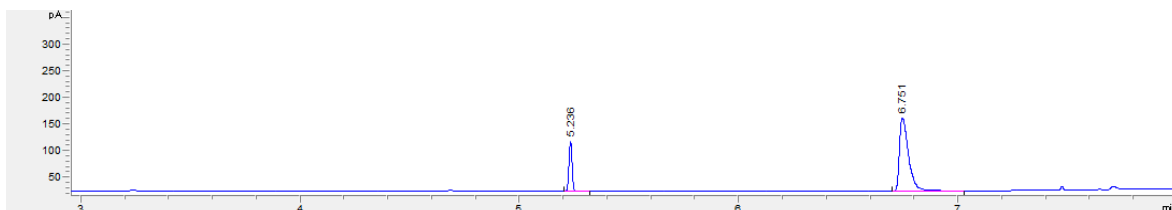

Dimethyl(*p*-tolyl)silanol (**2e**) – enzymatic reaction:

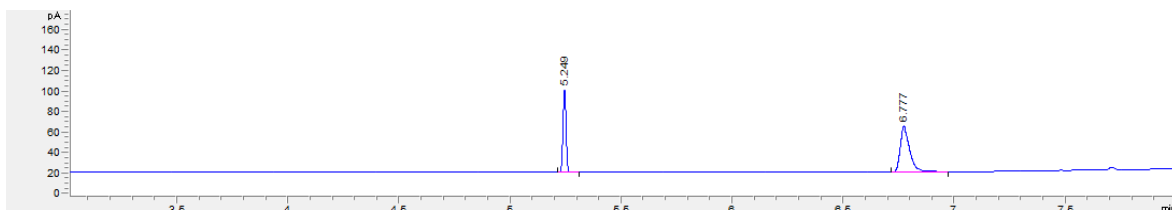

Dimethyl(thiophen-2-yl)silanol (**2g**) – standard:

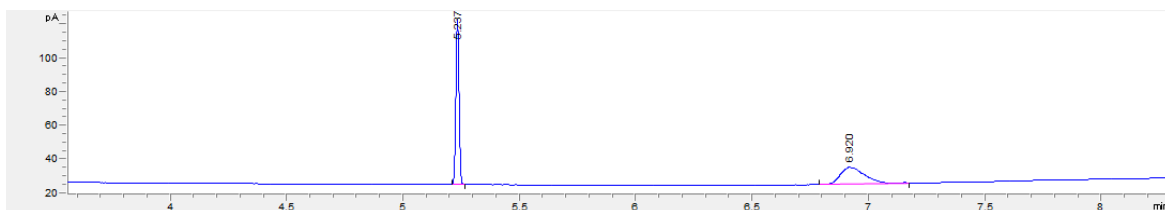

Dimethyl(thiophen-2-yl)silanol (**2g**) – enzymatic reaction:

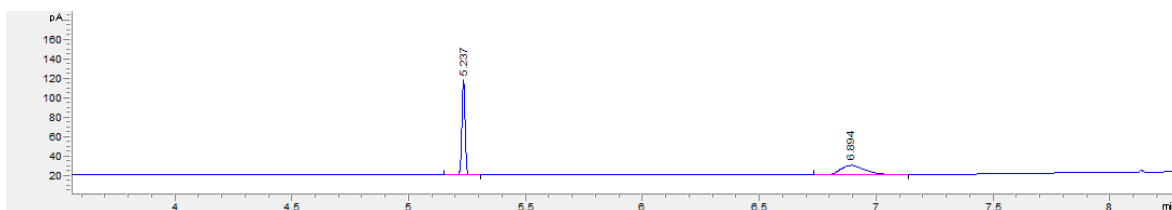

Methyldiphenylsilanol (**2i**) – standard:

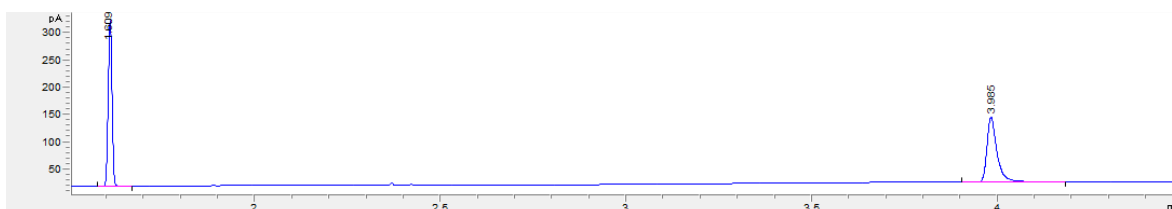

Methyldiphenylsilanol (**2i**) – enzymatic reaction:

*Note: The retention time of the starting hydrosilane **1i** is 2.43 min.*

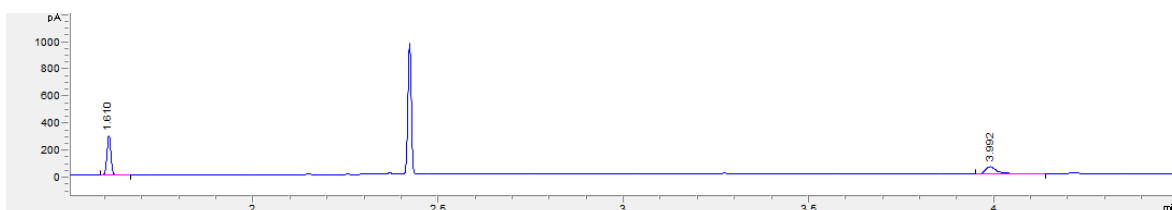

Triethylsilanol (**2j**) – standard:

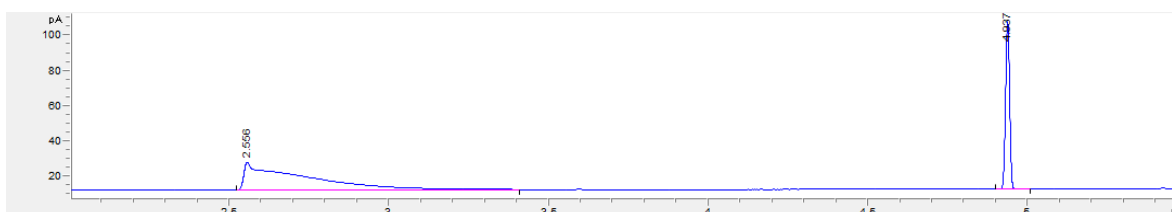

Triethylsilanol (**2j**) – enzymatic reaction:

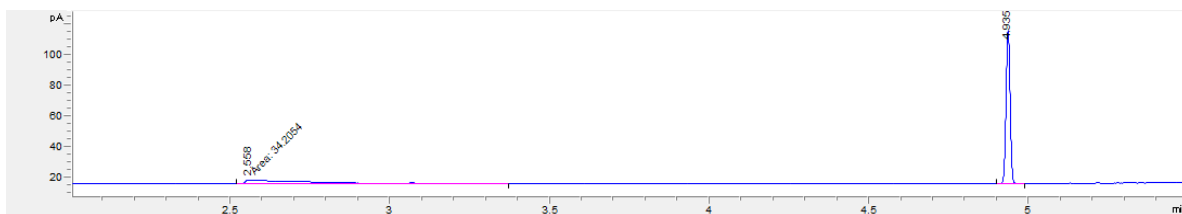

Butyldimethylsilanol (**2k**) – standard:

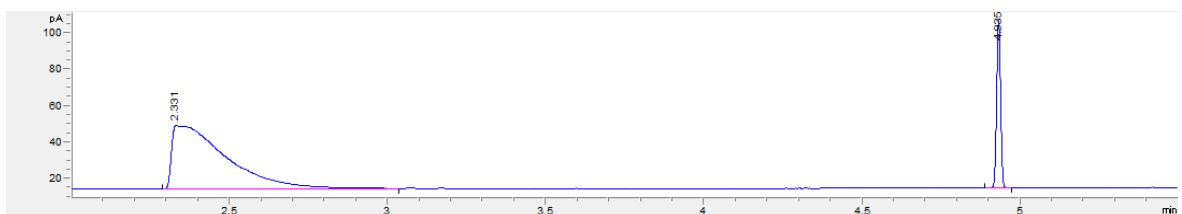

Butyldimethylsilanol (**2k**) – enzymatic reaction:

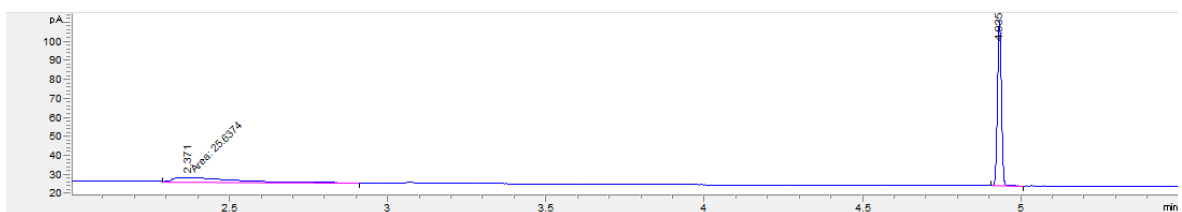

Pentamethyldisiloxanol (**2l**) – standard:

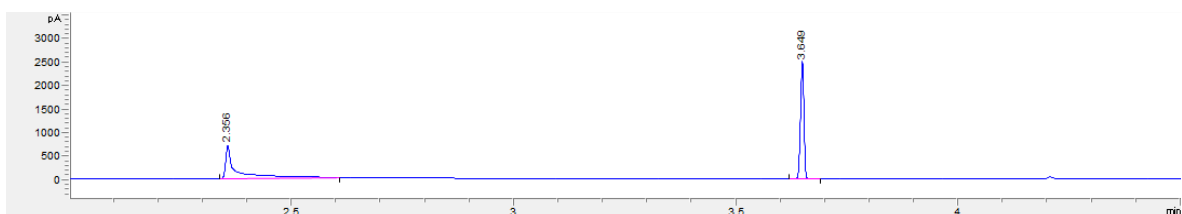

Pentamethyldisiloxanol (**2l**) – enzymatic reaction:

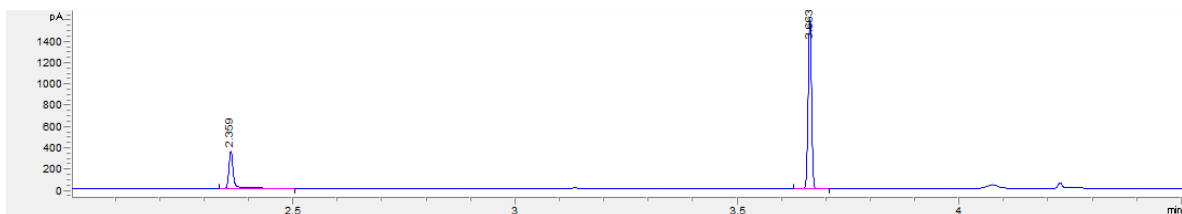

## Sequence of primers and variants

Table S5. Amino acid sequences of mutants relative to wild type (P450<sub>BM3</sub> WT).

| Variant:               | Amino acid substitutions:         |
|------------------------|-----------------------------------|
| P450 <sub>BM3</sub> WT | -                                 |
| P450 <sub>SiOx1</sub>  | P450 <sub>BM3</sub> F87G          |
| P450 <sub>SiOx2</sub>  | P450 <sub>SiOx1</sub> A328L       |
| P450 <sub>SiOx3</sub>  | P450 <sub>SiOx2</sub> L181D A184H |

### Sequences of the heme domain of all variants:

#### P450<sub>BM3</sub> WT:

ATGACAATTAAAGAAATGCCTCAGCCAAAAACGTTTGGAGAGCTTAAAAATTTACCGTTATTAACACAGATAAACCGGTT  
CAAGCTTTGATGAAAATTGCGGATGAATTAGGAGAAATCTTTAAATTCGAGGCGCCTGGTTCGTGTAACGCGCTACTTATC  
AAGTCAGCGTCTAATTAAGAAGCATGCGATGAATCACGCTTTGATAAAAACTTAAGTCAAGCGCTTAAATTTGTACGTG  
ATTTTGCAGGAGACGGGTTATTTACAAGCTGGACGCATGAAAAAATTTGAAAAAAGCGCATAATATCTTACTTCCAAGC  
TTCAGTCAGCAGGCAATGAAAGGCTATCATGCGATGATGGTCGATATCGCCGTGCAGCTTGTTCAAAGTGGGAGCGTC  
TAAATGCAGATGAGCATATTGAAGTACCGGAAGACATGACACGTTTAAACGCTTGATACAATTGGTCTTTGCGGCTTTAAC  
TATCGCTTTAACAGCTTTTACCGAGATCAGCCTCATCCATTTATTACAAGTATGGTCCGTGCACTGGATGAAGCAATGAA  
CAAGCTGCAGCGAGCAAATCCAGACGACCCAGCTTATGATGAAAACAAGCGCCAGTTTCAAGAAGATATCAAGGTGATG  
AACGACCTAGTAGATAAAATTTATGCAGATCGCAAAGCAAGCGGTGAACAAAGCGATGATTTATTAACGCATATGCTAAA  
CGGAAAAGATCCAGAAACGGGTGAGCCGCTTGATGACGAGAACATTCGCTATCAAATTATTACATTCTTAATTGCGGGA  
CACGAAACAACAAGTGGTCTTTTATCATTTGCGCTGTATTTCTTAGTGAAAAATCCACATGTATTACAAAAAGCAGCAGAA  
GAAGCAGCAGGTTCTAGTAGATCCTGTTCCAAGCTACAAACAAGTCAAACAGCTTAAATATGTCGGCATGGTCTTAAA  
CGAAGCGCTGCGCTTATGGCCAAGTCTCCTGCGTTTTCCCTATATGCAAAGAAGATACGGTGCCTTGGAGGAGAATAT  
CCTTTAGAAAAAGGCGACGAACTAATGGTTCTGATTCTCAGCTTACCGTGATAAAACAATTTGGGGAGACGATGTGG  
AAGAGTCCCGTCCAGAGCGTTTTGAAAATCCAAGTGCATTCCGCAGCATGCGTTTTAAACCGTTTTGAAAACGGTCAGCG  
TGCGTGTATCGGTCAGCAGTTGCTCTTTCATGAAGCAACGCTGGTACTTGGTATGATGCTAAAACACTTTGACTTTGAAG  
ATCATACAACTACGAGCTCGATATTAAGAACTTTAACGTTAAAAACCTGAAGGCTTTGTGGTAAAAGCAAAATCGAAAA  
AAATTCGCTTGGCGGTATTCTTCACCTAGCACTGAACAGT

#### P450<sub>SiOx1</sub>:

ATGACAATTAAAGAAATGCCTCAGCCAAAAACGTTTGGAGAGCTTAAAAATTTACCGTTATTAACACAGATAAACCGGTT  
CAAGCTTTGATGAAAATTGCGGATGAATTAGGAGAAATCTTTAAATTCGAGGCGCCTGGTTCGTGTAACGCGCTACTTATC  
AAGTCAGCGTCTAATTAAGAAGCATGCGATGAATCACGCTTTGATAAAAACTTAAGTCAAGCGCTTAAATTTGTACGTG  
ATTTTGCAGGAGACGGGTTAGGTACAAGCTGGACGCATGAAAAAATTTGAAAAAAGCGCATAATATCTTACTTCCAAGC  
TTCAGTCAGCAGGCAATGAAAGGCTATCATGCGATGATGGTCGATATCGCCGTGCAGCTTGTTCAAAGTGGGAGCGTC  
TAAATGCAGATGAGCATATTGAAGTACCGGAAGACATGACACGTTTAAACGCTTGATACAATTGGTCTTTGCGGCTTTAAC  
TATCGCTTTAACAGCTTTTACCGAGATCAGCCTCATCCATTTATTACAAGTATGGTCCGTGCACTGGATGAAGCAATGAA  
CAAGCTGCAGCGAGCAAATCCAGACGACCCAGCTTATGATGAAAACAAGCGCCAGTTTCAAGAAGATATCAAGGTGATG  
AACGACCTAGTAGATAAAATTTATGCAGATCGCAAAGCAAGCGGTGAACAAAGCGATGATTTATTAACGCATATGCTAAA  
CGGAAAAGATCCAGAAACGGGTGAGCCGCTTGATGACGAGAACATTCGCTATCAAATTATTACATTCTTAATTGCGGGA  
CACGAAACAACAAGTGGTCTTTTATCATTTGCGCTGTATTTCTTAGTGAAAAATCCACATGTATTACAAAAAGCAGCAGAA  
GAAGCAGCAGGTTCTAGTAGATCCTGTTCCAAGCTACAAACAAGTCAAACAGCTTAAATATGTCGGCATGGTCTTAAA  
CGAAGCGCTGCGCTTATGGCCAAGTCTCCTGCGTTTTCCCTATATGCAAAGAAGATACGGTGCCTTGGAGGAGAATAT

CCTTTAGAAAAAGGCGACGAACTAATGGTTCTGATTCCTCAGCTTCACCGTGATAAAAACAATTTGGGGAGACGATGTGG  
 AAGAGTTCCGTCCAGAGCGTTTTGAAAATCCAAGTGCATTCCGCAGCATGCGTTTAAACCGTTTTGAAAACGGTCAGCG  
 TGCGTGTATCGGTGAGCAGTTCGCTTTCATGAAGCAACGCTGGTACTTGGTATGATGCTAAAACACTTTGACTTTGAAG  
 ATCATACAACTACGAGCTCGATATTAAGAACTTTAACGTTAAAACCTGAAGGCTTTGTGGTAAAAGCAAAATCGAAAA  
 AAATTCGCTTGGCGGTATTCCCTTACCTAGCACTGAACAGT

### P450<sub>SiO<sub>2</sub></sub>:

ATGACAATTAAGAAATGCCTCAGCCAAAAACGTTTGGAGAGCTTAAAAATTTACCGTTATTAACACAGATAAACCGGTT  
 CAAGCTTTGATGAAAATTGCGGATGAATTAGGAGAAATCTTTAAATTCGAGGCGCCTGGTTCGTGTAACGCGCTACTTATC  
 AAGTCAGCGCTAATTAAGAAGCATGCGATGAATCACGCTTTGATAAAAACTTAAGTCAAGCGCTTAAATTTGTACGTG  
 ATTTTGCAGGAGACGGGTTAGGTACAAGCTGGACGCATGAAAAAATTTGAAAAAGCGCATAATATCTTACTTCCAAGC  
 TTCAGTCAGCAGGCAATGAAAGGCTATCATGCGATGATGGTCGATATCGCCGTGCAGCTTGTCAAAGTGGGAGCGTC  
 TAAATGCAGATGAGCATATTGAAGTACCGGAAGACATGACACGTTTAAACGCTTGATACAATTGGTCTTTGCGGCTTTAAC  
 TATCGCTTTAACAGCTTTTACCGAGATCAGCCTCATCCATTTATTACAAGTATGGTCCGTGCACTGGATGAAGCAATGAA  
 CAAGCTGCAGCGAGCAAATCCAGACGACCCAGCTTATGATGAAAACAAGCGCCAGTTTCAAGAAGATATCAAGGTGATG  
 AACGACCTAGTAGATAAAATTTATGCAGATCGCAAAGCAAGCGGTGAACAAAGCGATGATTTAATACGCATATGCTAAA  
 CGGAAAAGATCCAGAAACGGGTGAGCCGCTTATGACGAGAACATTCGCTATCAAATTATTACATTTAATTGCGGGA  
 CACGAAACAACAAGTGGTCTTTTATCATTGCGCTGTATTTCTTAGTGAAAAATCCACATGTATTACAAAAAGCAGCAGAA  
 GAAGCAGCAGGTTCTAGTAGATCCTGTTCCAAGCTACAAACAAGTCAAACAGCTTAAATATGTCGGCATGGTCTTAAA  
 CGAAGCGCTGCGCTTATGGCCAACGCTGCCTGCGTTTTCCCTATATGCAAAAAGATAACGGTGCCTTGGAGGAGAATAT  
 CCTTTAGAAAAAGGCGACGAACTAATGGTTCTGATTCCTCAGCTTCACCGTGATAAAAACAATTTGGGGAGACGATGTGG  
 AAGAGTTCCGTCCAGAGCGTTTTGAAAATCCAAGTGCATTCCGCAGCATGCGTTTAAACCGTTTTGAAAACGGTCAGCG  
 TGCGTGTATCGGTGAGCAGTTCGCTTTCATGAAGCAACGCTGGTACTTGGTATGATGCTAAAACACTTTGACTTTGAAG  
 ATCATACAACTACGAGCTCGATATTAAGAACTTTAACGTTAAAACCTGAAGGCTTTGTGGTAAAAGCAAAATCGAAAA  
 AAATTCGCTTGGCGGTATTCCCTTACCTAGCACTGAACAGT

### P450<sub>SiO<sub>3</sub></sub>:

ATGACAATTAAGAAATGCCTCAGCCAAAAACGTTTGGAGAGCTTAAAAATTTACCGTTATTAACACAGATAAACCGGTT  
 CAAGCTTTGATGAAAATTGCGGATGAATTAGGAGAAATCTTTAAATTCGAGGCGCCTGGTTCGTGTAACGCGCTACTTATC  
 AAGTCAGCGCTAATTAAGAAGCATGCGATGAATCACGCTTTGATAAAAACTTAAGTCAAGCGCTTAAATTTGTACGTG  
 ATTTTGCAGGAGACGGGTTAGGTACAAGCTGGACGCATGAAAAAATTTGAAAAAGCGCATAATATCTTACTTCCAAGC  
 TTCAGTCAGCAGGCAATGAAAGGCTATCATGCGATGATGGTCGATATCGCCGTGCAGCTTGTCAAAGTGGGAGCGTC  
 TAAATGCAGATGAGCATATTGAAGTACCGGAAGACATGACACGTTTAAACGCTTGATACAATTGGTCTTTGCGGCTTTAAC  
 TATCGCTTTAACAGCTTTTACCGAGATCAGCCTCATCCATTTATTACAAGTATGGTCCGTGCAATGATGAACATATGAAC  
 AAGCTGCAGCGAGCAAATCCAGACGACCCAGCTTATGATGAAAACAAGCGCCAGTTTCAAGAAGATATCAAGGTGATGA  
 ACGACCTAGTAGATAAAATTTATGCAGATCGCAAAGCAAGCGGTGAACAAAGCGATGATTTAATACGCATATGCTAAAC  
 GGAAAAGATCCAGAAACGGGTGAGCCGCTTATGACGAGAACATTCGCTATCAAATTATTACATTTAATTGCGGGACA  
 CGAAACAACAAGTGGTCTTTTATCATTGCGCTGTATTTCTTAGTGAAAAATCCACATGTATTACAAAAAGCAGCAGAAGA  
 AGCAGCAGGTTCTAGTAGATCCTGTTCCAAGCTACAAACAAGTCAAACAGCTTAAATATGTCGGCATGGTCTTAAACG  
 AAGCGCTGCGCTTATGGCCAACGCTGCCTGCGTTTTCCCTATATGCAAAAAGATAACGGTGCCTTGGAGGAGAATATCC  
 TTTAGAAAAAGGCGACGAACTAATGGTTCTGATTCCTCAGCTTCACCGTGATAAAAACAATTTGGGGAGACGATGTGGAA  
 GAGTTCCGTCCAGAGCGTTTTGAAAATCCAAGTGCATTCCGCAGCATGCGTTTAAACCGTTTTGAAAACGGTCAGCGTG  
 CGTGTATCGGTGAGCAGTTCGCTTTCATGAAGCAACGCTGGTACTTGGTATGATGCTAAAACACTTTGACTTTGAAGAT  
 CATACAACTACGAGCTCGATATTAAGAACTTTAACGTTAAAACCTGAAGGCTTTGTGGTAAAAGCAAAATCGAAAAA  
 ATTCCGCTTGGCGGTATTCCCTTACCTAGCACTGAACAGT

## Primers

Table S6. Primer sequences.

| Primer | Sequence                                           |
|--------|----------------------------------------------------|
| 005    | AACTTTAAGAAGGAGATATACATATGACAATTAAGAAATGCCTCAGCCA  |
| 006    | CAGTGCTAGGTGAAGGAATACCGCCAAGCGGAA                  |
| 007    | TGGCTGAGGCATTTCTTTAATTGTCATATGTATATCTCCTTCTTAAAGTT |
| 008    | TTCCGCTTGGCGGTATTCCCTTACCTAGCACTG                  |
| T7     | TAATACGACTCACTATAGGG                               |



Table S7. Primers for 87 single site-saturation library generation.

|           |                                              |
|-----------|----------------------------------------------|
| 87NNK_for | TGCAGGAGACGGGTT <b>ANNK</b> ACAAGCTGGACGCATG |
| 87NNK_rev | CATGCGTCCAGCTTGT <b>MNNT</b> AACCCGTCTCCTGCA |

Table S8. Primers for 327/328 double site-saturation library generation.

|                   |                                         |
|-------------------|-----------------------------------------|
| 327NDT_328NDT_for | GCTTATGGCC <b>ANDTNDT</b> CCTGCGTTTTCC  |
| 327NDT_328NDT_rev | GGAAAACGCAGG <b>AHNAHNT</b> GGCCATAAGC  |
| 327VHG_328VHG_for | GCTTATGGCC <b>AVHGVHGC</b> CTGCGTTTTCC  |
| 327VHG_328VHG_rev | GGAAAACGCAGG <b>CDBCDBT</b> GGCCATAAGC  |
| 327NDT_328VHG_for | GCTTATGGCC <b>ANDTVHGC</b> CTGCGTTTTCC  |
| 327NDT_328VHG_rev | GGAAAACGCAGG <b>CDBAHNT</b> GGCCATAAGC  |
| 327VHG_328NDT_for | GCTTATGGCC <b>AVHGNDT</b> CCTGCGTTTTCC  |
| 327VHG_328NDT_rev | GGAAAACGCAGG <b>AHNCDBT</b> GGCCATAAGC  |
| 327NDT_328TGG_for | GCTTATGGCC <b>ANDTTGGC</b> CTGCGTTTTCC  |
| 327NDT_328TGG_rev | GGAAAACGCAGG <b>CCAAHNT</b> GGCCATAAGC  |
| 327TGG_328NDT_for | GCTTATGGCC <b>ATGGNDT</b> CCTGCGTTTTCC  |
| 327TGG_328NDT_rev | GGAAAACGCAGG <b>AHNC</b> ATGGCCATAAGC   |
| 327VHG_328TGG_for | GCTTATGGCC <b>AVHGTGGC</b> CTGCGTTTTCC  |
| 327VHG_328TGG_rev | GGAAAACGCAGG <b>CCACDBT</b> GGCCATAAGC  |
| 327TGG_328VHG_for | GCTTATGGCC <b>ATGGVHGC</b> CTGCGTTTTCC  |
| 327TGG_328VHG_rev | GGAAAACGCAGG <b>CDBCC</b> ATGGCCATAAGC  |
| 327TGG_328TGG_for | GCTTATGGCC <b>ATGGTGGC</b> CTGCGTTTTCC  |
| 327TGG_328TGG_rev | GGAAAACGCAGG <b>CCACCA</b> ATGGCCATAAGC |

Table S9. Primers for 181/184 double site-saturation library generation.

|                   |                                                    |
|-------------------|----------------------------------------------------|
| 181NDT_184NDT_for | GGTCCGTGC <b>ANDT</b> GATGA <b>ANDT</b> ATGAACAAGC |
| 181NDT_184NDT_rev | GCTTGTTCA <b>AHNTT</b> CAT <b>CAHNT</b> GCACGGACC  |
| 181VHG_184VHG_for | GGTCCGTGC <b>AVHGG</b> ATGA <b>AVH</b> GATGAACAAGC |
| 181VHG_184VHG_rev | GCTTGTTCA <b>CDBTTC</b> CAT <b>CDBT</b> GCACGGACC  |
| 181NDT_184VHG_for | GGTCCGTGC <b>ANDT</b> GATGA <b>AVH</b> GATGAACAAGC |
| 181NDT_184VHG_rev | GCTTGTTCA <b>CDBTTC</b> CAT <b>CAHNT</b> GCACGGACC |
| 181VHG_184NDT_for | GGTCCGTGC <b>AVHGG</b> ATGA <b>ANDT</b> ATGAACAAGC |
| 181VHG_184NDT_rev | GCTTGTTCA <b>AHNTT</b> CAT <b>CDBT</b> GCACGGACC   |
| 181NDT_184TGG_for | GGTCCGTGC <b>ANDT</b> GATGA <b>ATGG</b> ATGAACAAGC |
| 181NDT_184TGG_rev | GCTTGTTCA <b>CCATT</b> CAT <b>CAHNT</b> GCACGGACC  |

|                   |                                               |
|-------------------|-----------------------------------------------|
| 181TGG_184NDT_for | GGTCCGTGCATGGGATGAANDTATGAACAAGC              |
| 181TGG_184NDT_rev | GCTTGTTCA <del>A</del> HNTTCATCCCATGCACGGACC  |
| 181VHG_184TGG_for | GGTCCGTGCAVHGGATGAATGGATGAACAAGC              |
| 181VHG_184TGG_rev | GCTTGTTCA <del>T</del> CCATTCATCCDBTGCACGGACC |
| 181TGG_184VHG_for | GGTCCGTGCATGGGATGAAVHGATGAACAAGC              |
| 181TGG_184VHG_rev | GCTTGTTCA <del>T</del> CDBTTCATCCCATGCACGGACC |
| 181TGG_184TGG_for | GGTCCGTGCATGGGATGAATGGATGAACAAGC              |
| 181TGG_184TGG_rev | GCTTGTTCA <del>T</del> CCATTCATCCCATGCACGGACC |

## Syntheses and characterization of authentic standards

### Syntheses

Silanol **2a** was purchased from commercial vendors. Other silanols were synthesized as described below.

**General Procedure 1 (GP 1):** According to a literature procedure,<sup>8</sup> the hydrosilane (1–5 mmol, 1.0 equiv) was added dropwise to a suspension of Pd/C (10 w-%, 0.1–0.4 mol-%) and H<sub>2</sub>O (3 equiv) in ethyl acetate (0.8–1 M). The mixture was stirred at room temperature until H<sub>2</sub> evolution ceased (0.5–4 h). The suspension was filtered over neutral Al<sub>2</sub>O<sub>3</sub> with ethyl acetate, and the solvent was removed under reduced pressure. Column chromatography on silica gel (eluent: hexanes/ethyl acetate) was carried out if necessary.

**Dimethyl(phenyl)silanol (2a).** <sup>1</sup>H NMR (400 MHz, CDCl<sub>3</sub>): δ = 0.41 (s, 6H), 2.05 (br s, 1H), 7.37–7.43 (m, 3H), 7.59–7.62 (m, 2H). <sup>13</sup>C{<sup>1</sup>H} NMR (101 MHz, CDCl<sub>3</sub>): δ = 0.0, 128.0, 133.2, 139.2 ppm. GC (DB-WAXetr, Method A): *t*<sub>R</sub> = 3.02 min.

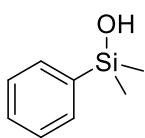

**Ethyl(methyl)(phenyl)silanol (2b).** Obtained from **1b** (0.15 g, 1.0 mmol) according to GP1 as a clear liquid (0.17 g, 1.0 mmol, quant.). <sup>1</sup>H NMR (400 MHz, CDCl<sub>3</sub>): δ = 0.39 (s, 1H), 0.83–0.88 (m, 2H), 0.99–1.03 (m, 3H), 1.81 (br s, 1H), 7.36–7.41 (m, 3H), 7.58–7.60 (m, 2H) ppm. <sup>13</sup>C{<sup>1</sup>H} NMR (101

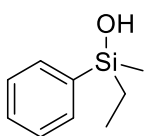

MHz, CDCl<sub>3</sub>):  $\delta$  = -2.1, 6.8, 8.3, 128.0, 129.8, 133.4, 138.3 ppm. GC (DB-WAXetr, Method B):  $t_R$  = 6.76 min.

**Methyl(phenyl)(vinyl)silanol (2c).** According to a literature procedure,<sup>1c</sup> the

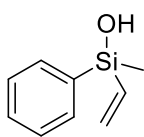

hydrosilane **1c** (0.37 mmol, 1.0 equiv) was dropwise added to a solution of [Ru(*p*-cymene)<sub>2</sub>Cl<sub>2</sub>] (0.88 mol-%) and H<sub>2</sub>O (12 equiv) in MeCN (0.5 M). The mixture was stirred at room temperature until H<sub>2</sub> evolution ceased (45 min). The solvent was evaporated, the residue was filtered over neutral Al<sub>2</sub>O<sub>3</sub> with hexanes and the solvent was removed under reduced pressure. Silanol **1c** (55 mg, 4.3 mmol, 90%) was obtained as a clear liquid. <sup>1</sup>H NMR (400 MHz, CDCl<sub>3</sub>):  $\delta$  = 0.48 (s, 3H), 1.83 (br s, 1H), 5.89 (dd,  $J$  = 20.3, 3.9 Hz, 1H), 6.14 (dd,  $J$  = 14.8, 3.9 Hz, 1H), 6.31 (dd,  $J$  = 20.3, 14.8 Hz, 1H), 7.36–7.44 (m, 3H), 7.60–7.62 (m, 2H) ppm. <sup>13</sup>C{<sup>1</sup>H} NMR (101 MHz, CDCl<sub>3</sub>):  $\delta$  = -1.56, 128.1, 130.0, 133.7, 134.8, 136.6, 137.3 ppm. (DB-WAXetr, Method B):  $t_R$  = 7.10 min. The spectroscopic data are in accordance with those reported.<sup>9</sup>

**Benzyl(dimethyl)silanol (2d).** Obtained from **1d** (0.15 g, 1.0 mmol) according to

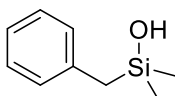

GP1. The crude product was purified via column chromatography on silica gel (eluent: hexanes/ethyl acetate) to afford **2d** (65 mg, 0.39 mmol, 39% yield) as a clear liquid. <sup>1</sup>H NMR (400 MHz, CDCl<sub>3</sub>):  $\delta$  = 0.14 (s, 6H), 1.60 (br s, 1H), 2.18 (s, 2H), 7.06 (m<sub>c</sub>, 2H), 7.10 (m<sub>c</sub>, 1H), 7.24 (m<sub>c</sub>, 1H) ppm. <sup>13</sup>C{<sup>1</sup>H} NMR (101 MHz, CDCl<sub>3</sub>):  $\delta$  = -0.6, 28.2, 124.4, 128.3, 128.6, 139.1 ppm. GC (DB-WAXetr, Method B):  $t_R$  = 6.61 min. The spectroscopic data are in accordance with those reported.<sup>10</sup>

**Dimethyl(*p*-tolyl)silanol (2e).** Obtained from **1e** (0.15 g, 1.0 mmol) according to

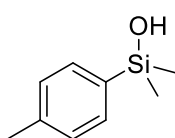

GP1. The crude product was purified via column chromatography on silica gel (eluent: hexanes/ethyl acetate) to afford **2e** (0.10 g, 0.67 mmol, 67% yield) as a clear liquid. <sup>1</sup>H NMR (400 MHz, CDCl<sub>3</sub>):  $\delta$  = 0.40 (s, 6H), 1.80 (br s, 1H), 2.37 (s, 3H), 7.22 (m<sub>c</sub>, 2H), 7.50 (m<sub>c</sub>, 2H) ppm. <sup>13</sup>C NMR (101 MHz, CDCl<sub>3</sub>)  $\delta$  = 0.2, 21.6, 128.9, 133.3, 135.7, 139.8 ppm. GC (DB-WAXetr,

Method B):  $t_R = 6.75$  min. The spectroscopic data are in accordance with those reported.<sup>11</sup>

**Dimethyl(thiophen-2-yl)silanol (2g).** Obtained from **1g** (0.14 g, 1.0 mmol)

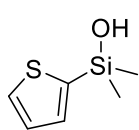

according to GP1 as a clear liquid (0.15 g, 0.92 mmol, 92%).  $^1\text{H}$  NMR (400 MHz,  $\text{CDCl}_3$ ):  $\delta = 0.47$  (s, 6H), 2.05 (br s, 1H), 7.22 (dd,  $J = 4.7, 3.3$  Hz, 1H), 7.37 (dd,  $J = 3.3, 0.8$  Hz, 1H), 7.64 (dd, 4.7, 0.8 Hz, 1H) ppm.  $^{13}\text{C}\{^1\text{H}\}$  NMR (101 MHz,  $\text{CDCl}_3$ ):  $\delta = 1.1, 128.4, 131.3, 134.8, 138.7$  ppm. (DB-WAXetr, Method B):  $t_R = 6.77$  min. The spectroscopic data are in accordance with those reported.<sup>12</sup>

**Methyldiphenylsilanol (2i).** Obtained from **1i** (0.85 g, 4.3 mmol) according to GP1

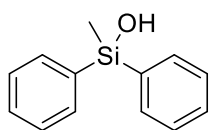

yield as a clear liquid (0.92 g, 4.3 mmol, quant.).  $^1\text{H}$  NMR (400 MHz,  $\text{CDCl}_3$ ):  $\delta = 0.68$  (s, 3H), 2.34 (br s, 1H), 7.36–7.45 (m, 6H), 7.62 (m<sub>c</sub>, 4H) ppm.  $^{13}\text{C}\{^1\text{H}\}$  NMR (101 MHz,  $\text{CDCl}_3$ ):  $\delta = -1.1, 128.1, 130.0, 134.1, 137.2$  ppm. (DB-WAXetr, Method E):  $t_R = 3.99$  min. The spectroscopic data are in accordance with those reported.<sup>12</sup>

**Triethylsilanol (2j).** Obtained from **1j** (0.50 g, 4.3 mmol) according to GP1 as a clear

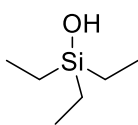

liquid (0.53 g, 4.0 mmol, 93%).  $^1\text{H}$  NMR (400 MHz,  $\text{CDCl}_3$ ):  $\delta = 0.55$ –0.62 (m, 6H), 0.94–0.99 (m, 9H), 1.88 (br s, 1H) ppm.  $^{13}\text{C}\{^1\text{H}\}$  NMR (101 MHz,  $\text{CDCl}_3$ ):  $\delta = 5.9, 6.7$  ppm. GC (DB-WAXetr, Method C):  $t_R = 2.56$  min. The spectroscopic data are in accordance with those reported.<sup>8</sup>

**Butyldimethylsilanol (2k).** Obtained from **1k** (0.50 g, 4.3 mmol) according to GP1

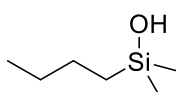

in as a clear liquid (0.47 g, 0.36 mmol, 83%).  $^1\text{H}$  NMR (400 MHz,  $\text{CDCl}_3$ ):  $\delta = 0.11$  (s, 6H), 0.57–0.61 (m, 2H), 0.88 (m<sub>c</sub>, 3H), 1.29–1.37 (m, 4H), 1.94 (br s, 1H) ppm.  $^{13}\text{C}\{^1\text{H}\}$  NMR (101 MHz,  $\text{CDCl}_3$ ):  $\delta = -0.2, 13.9, 17.6, 25.5, 26.5$  ppm. GC (DB-WAXetr, Method C):  $t_R = 2.33$  min. The spectroscopic data are in accordance with those reported.<sup>13</sup>

**Pentamethyldisiloxanol (2I)**. Obtained from **1I** (0.15 g, 4.3 mmol) according to GP1

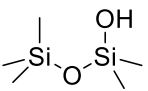 as a clear liquid (0.17 mg, 4.3 mmol, quant.).  $^1\text{H}$  NMR (400 MHz,  $\text{CDCl}_3$ ):  $\delta$  = 0.11 (s, 9H), 0.12 (s, 6H), 1.97 (br s, 1H) ppm.  $^{13}\text{C}\{^1\text{H}\}$  NMR (101 MHz,  $\text{CDCl}_3$ ):  $\delta$  = 0.6, 1.9 ppm. GC (DB-WAXetr, Method D):  $t_{\text{R}}$  = 2.37 min.

## NMR Spectra

## Dimethyl(phenyl)silanol (2a)

$^1\text{H}$  NMR (400 MHz,  $\text{CDCl}_3$ ):  
*enzymatic reaction*

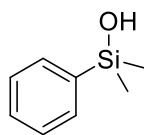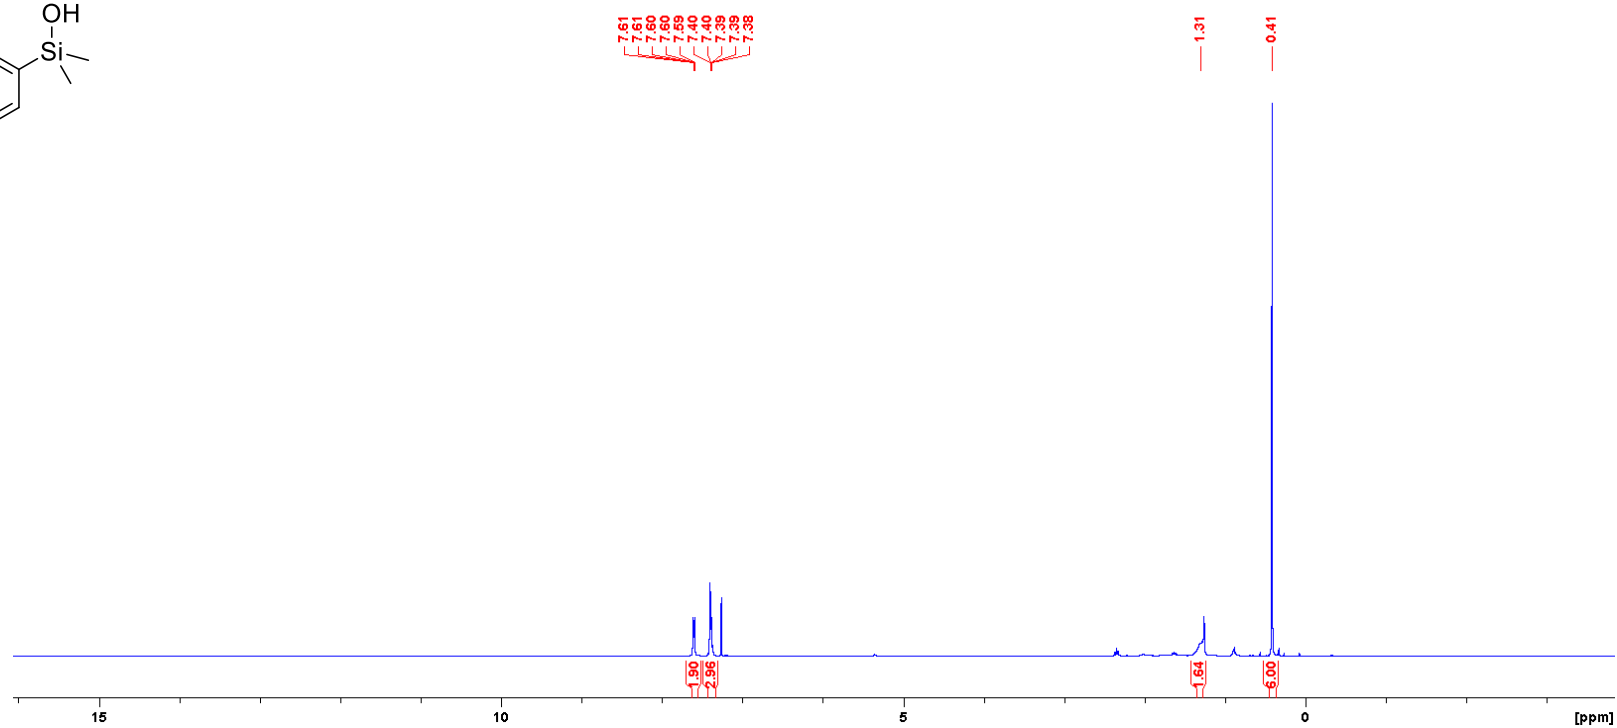

$^1\text{H}$  NMR (400 MHz,  $\text{CDCl}_3$ ):

*authentic standard*

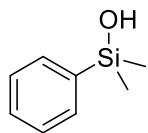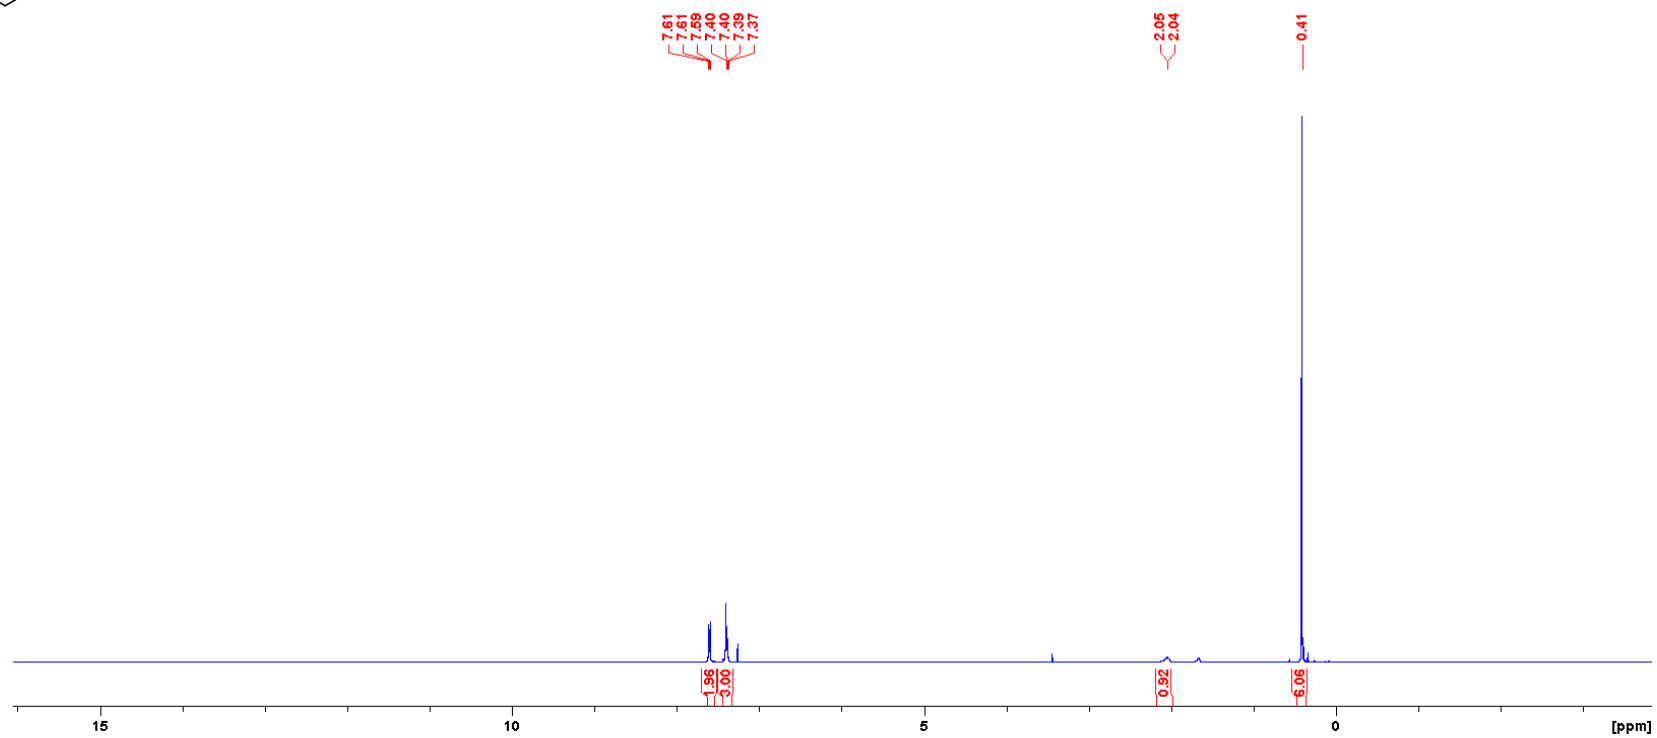

$^{13}\text{C}\{^1\text{H}\}$  NMR (101 MHz,  $\text{CDCl}_3$ ):

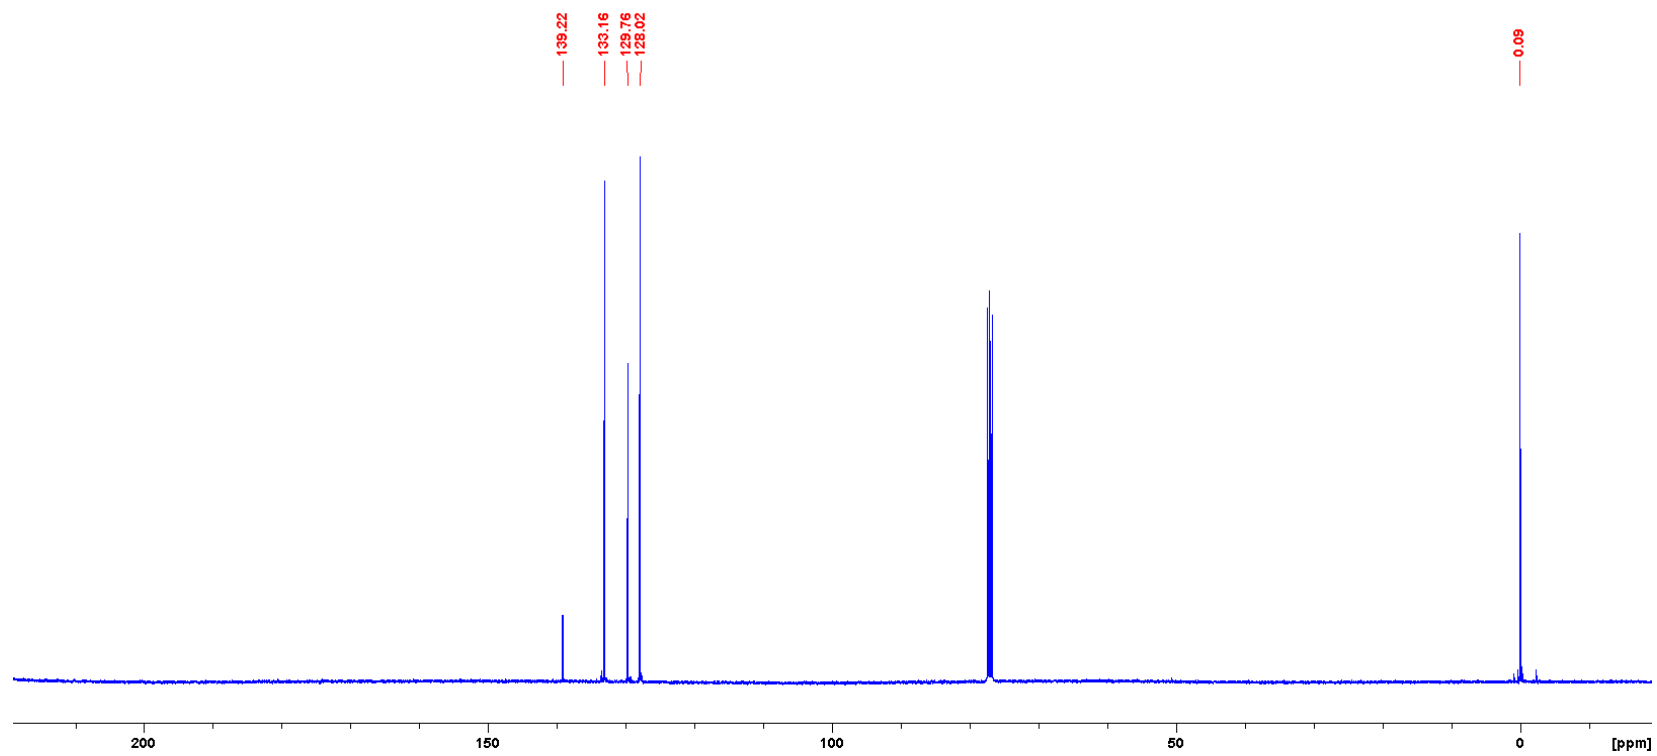



**Ethyl(methyl)(phenyl)silanol (2b)**<sup>1</sup>H NMR (400 MHz, CDCl<sub>3</sub>):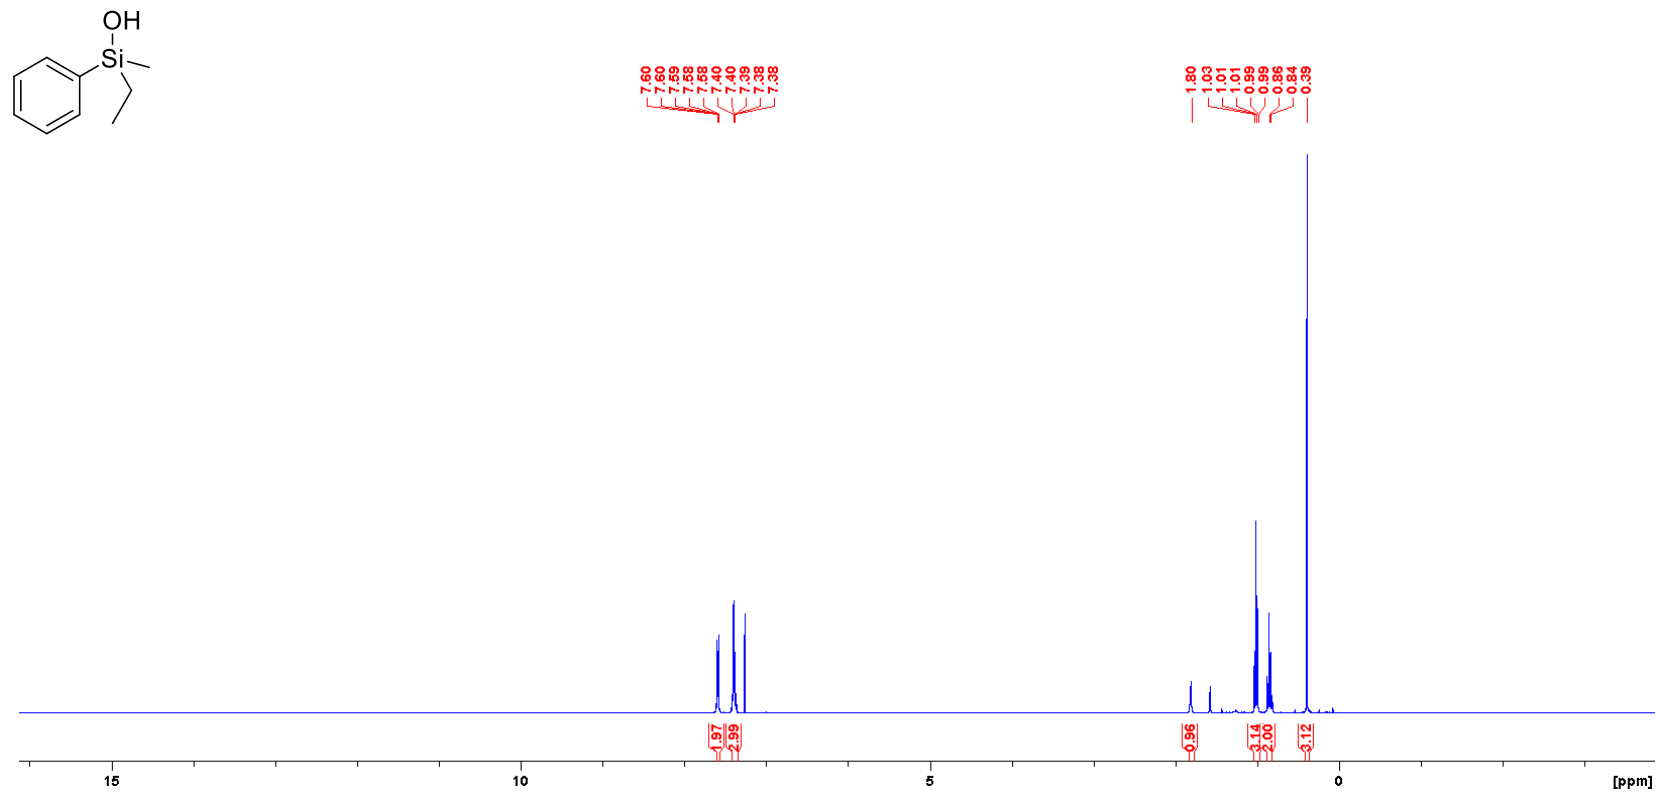

$^{13}\text{C}\{^1\text{H}\}$  NMR (101 MHz,  $\text{CDCl}_3$ ):

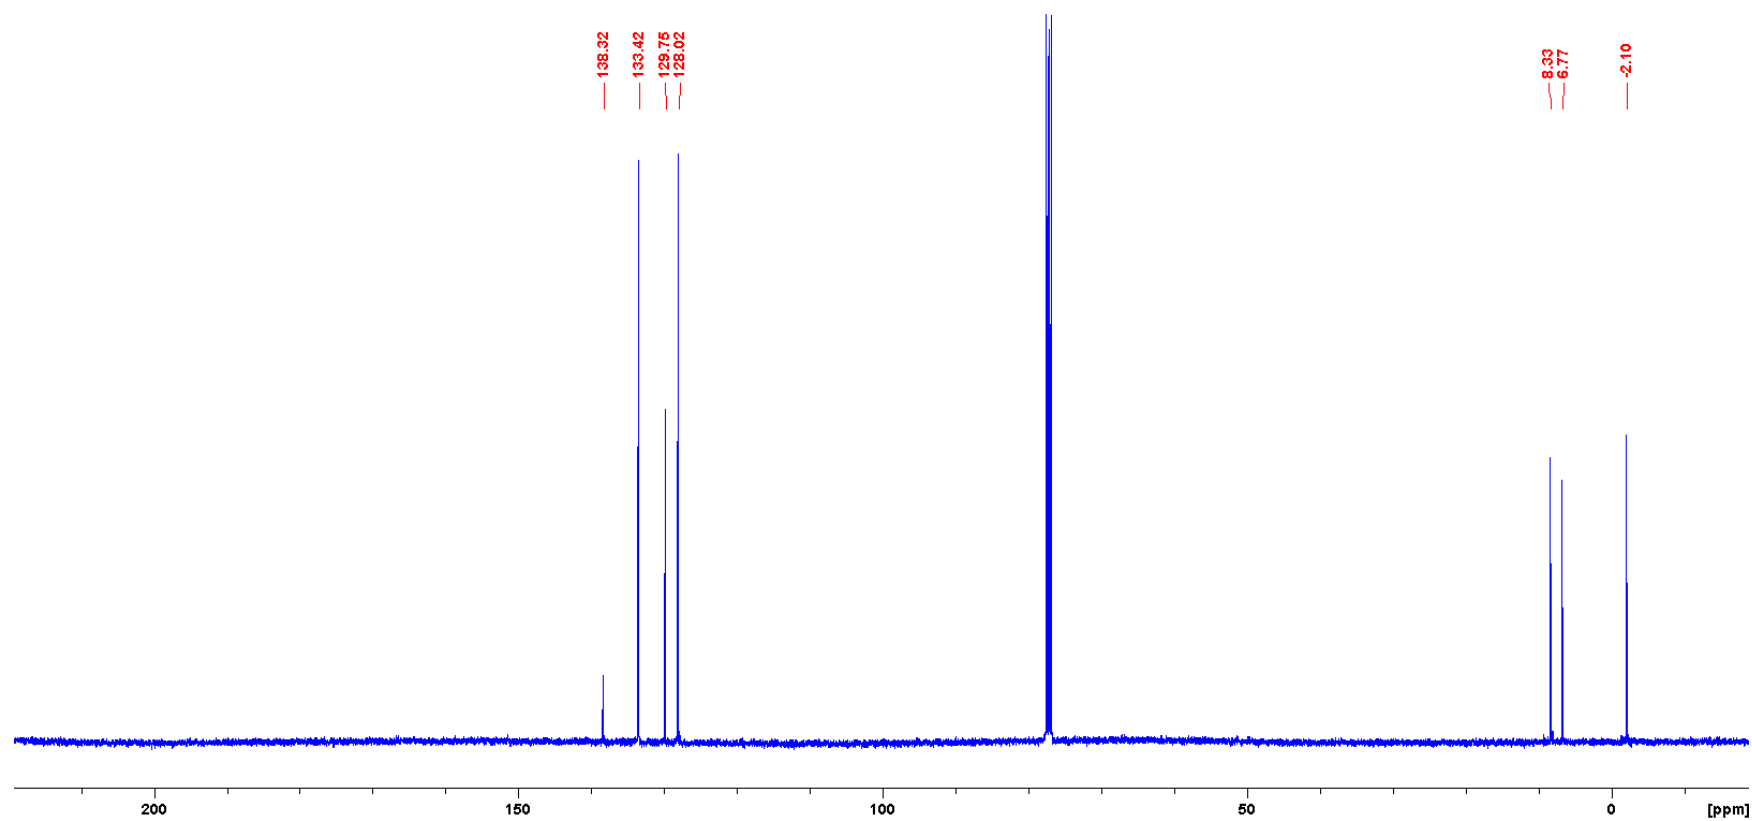

**Methyl(phenyl)(vinyl)silanol (2c)**<sup>1</sup>H NMR (400 MHz, CDCl<sub>3</sub>):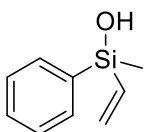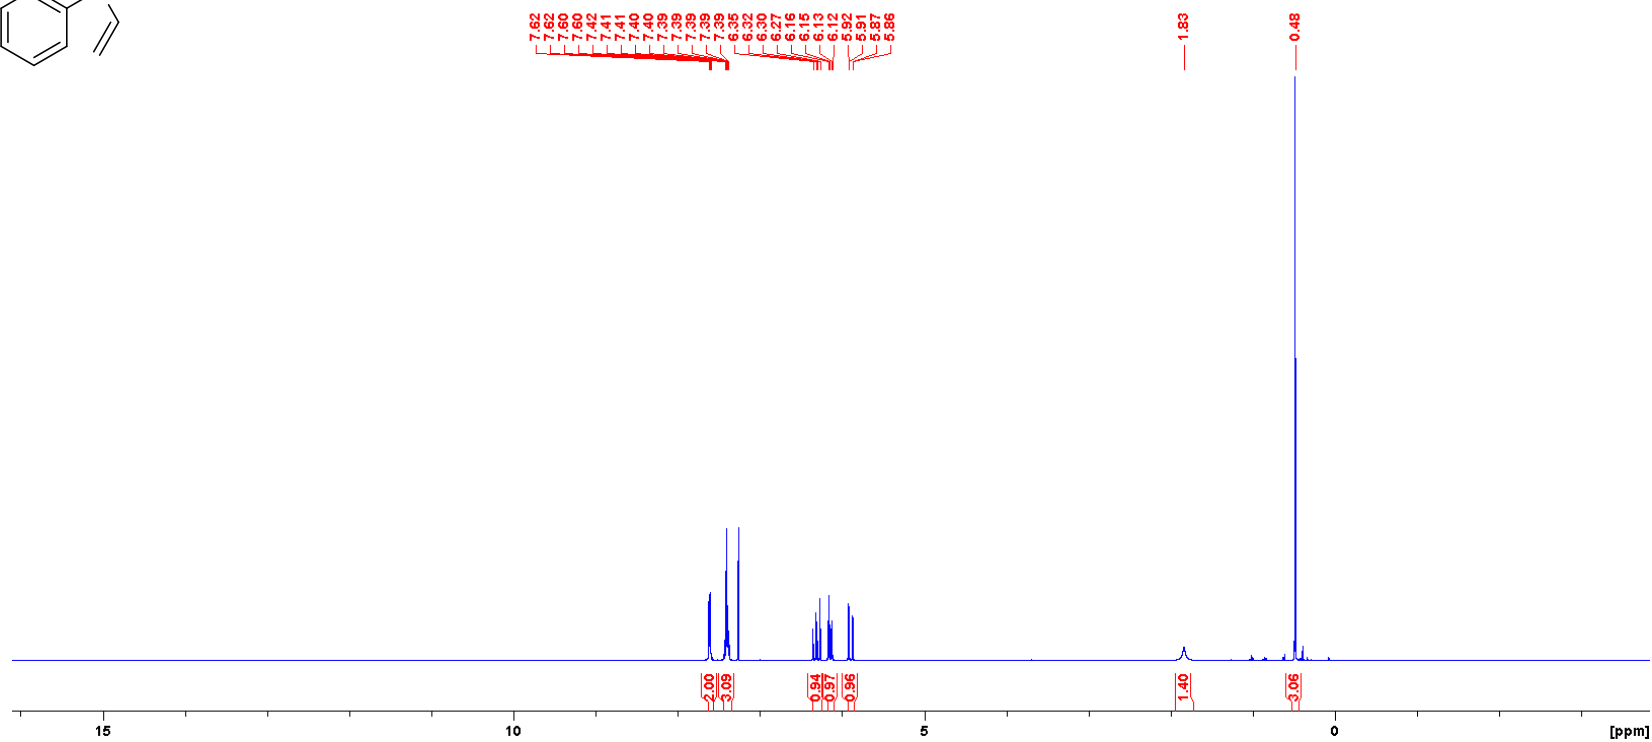

$^{13}\text{C}\{^1\text{H}\}$  NMR (101 MHz,  $\text{CDCl}_3$ ):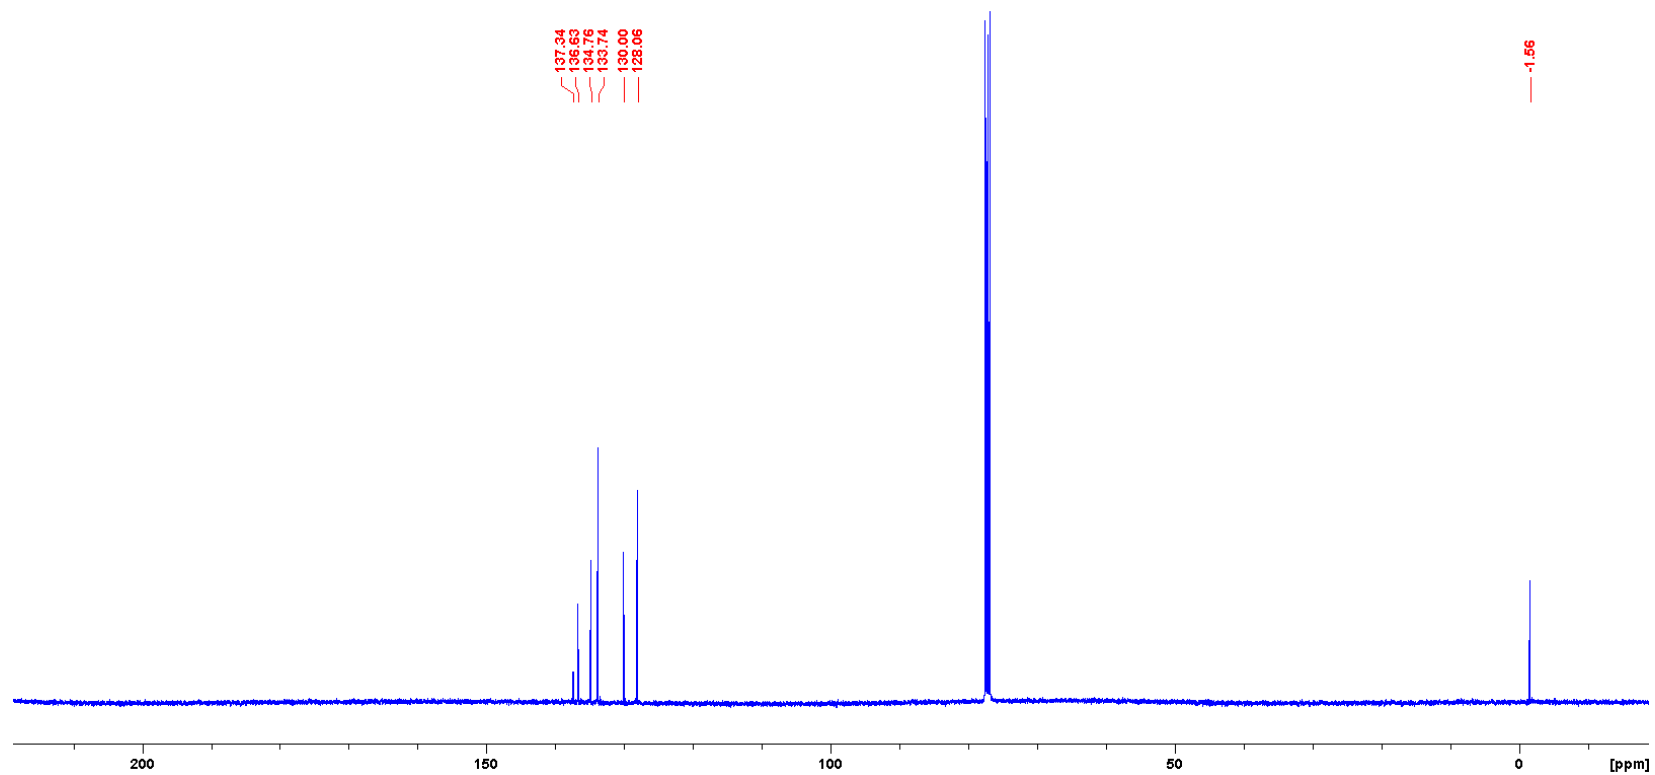

**Benzyltrimethylsilanol (2d)** $^1\text{H}$  NMR (400 MHz,  $\text{CDCl}_3$ ):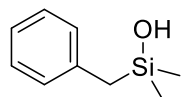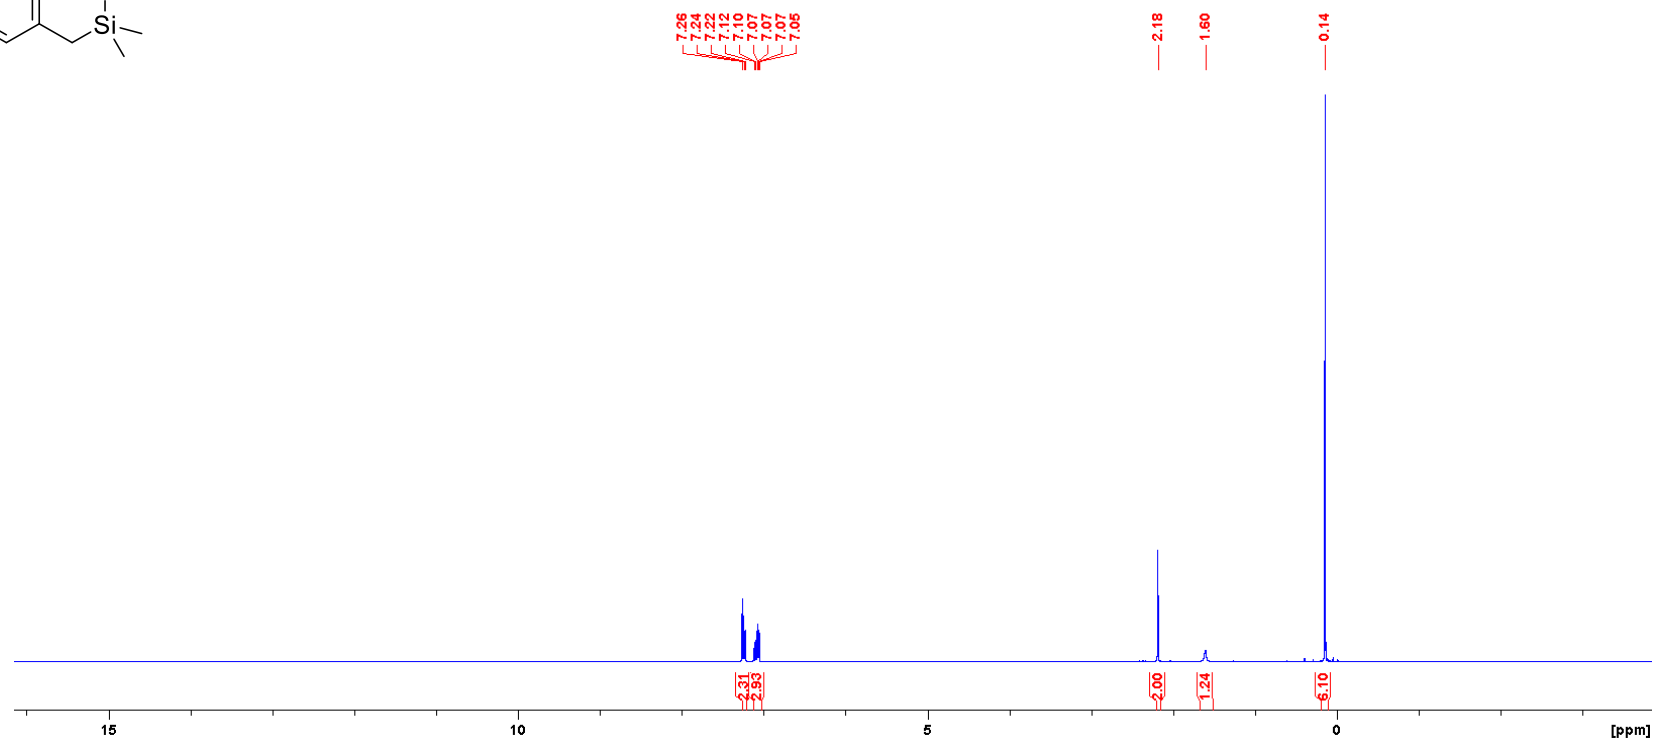

$^{13}\text{C}\{^1\text{H}\}$  NMR (101 MHz,  $\text{CDCl}_3$ ):

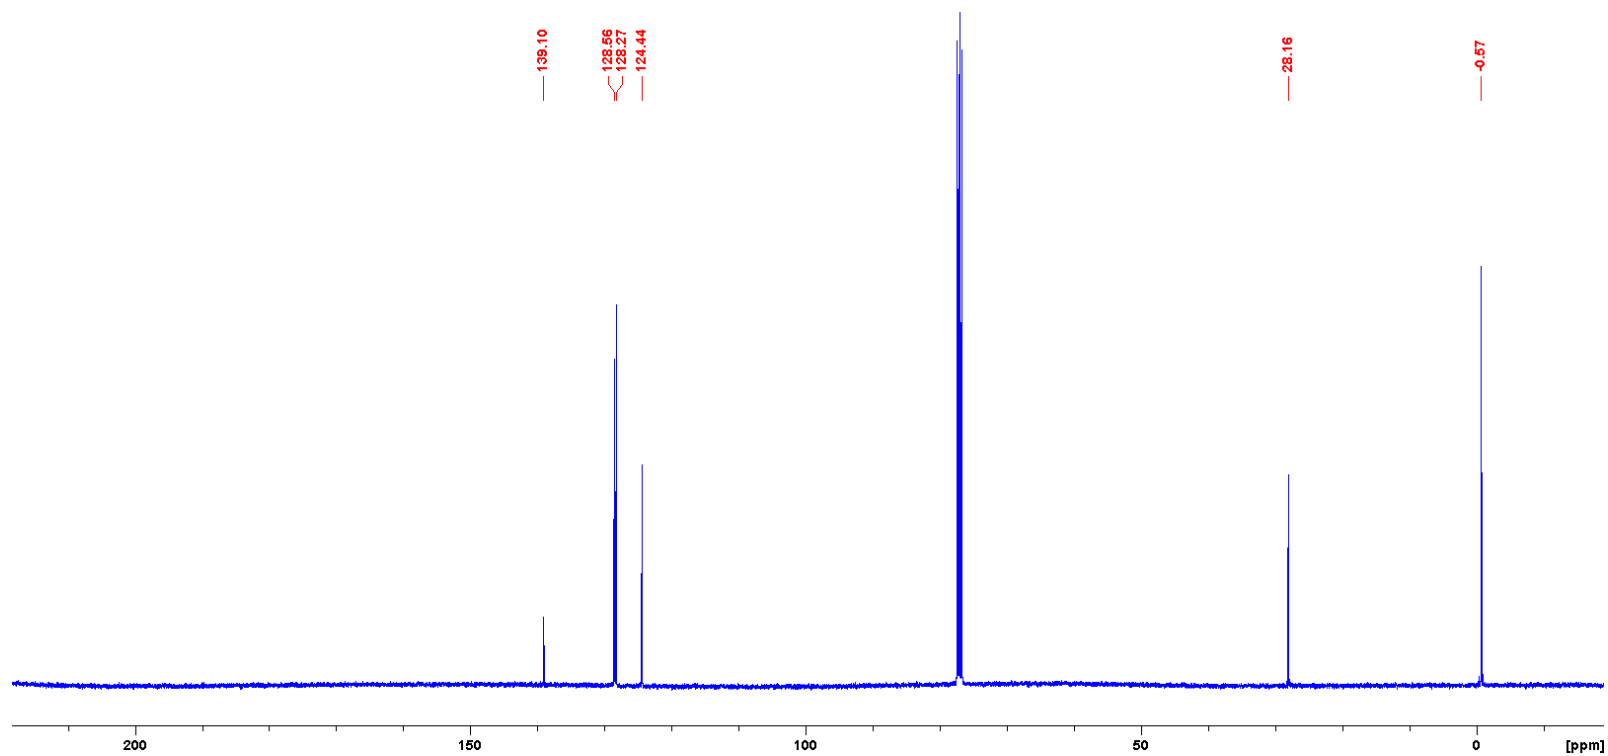

**Dimethyl(*p*-tolyl)silanol (2e)**<sup>1</sup>H NMR (400 MHz, CDCl<sub>3</sub>):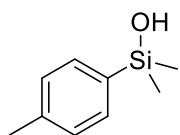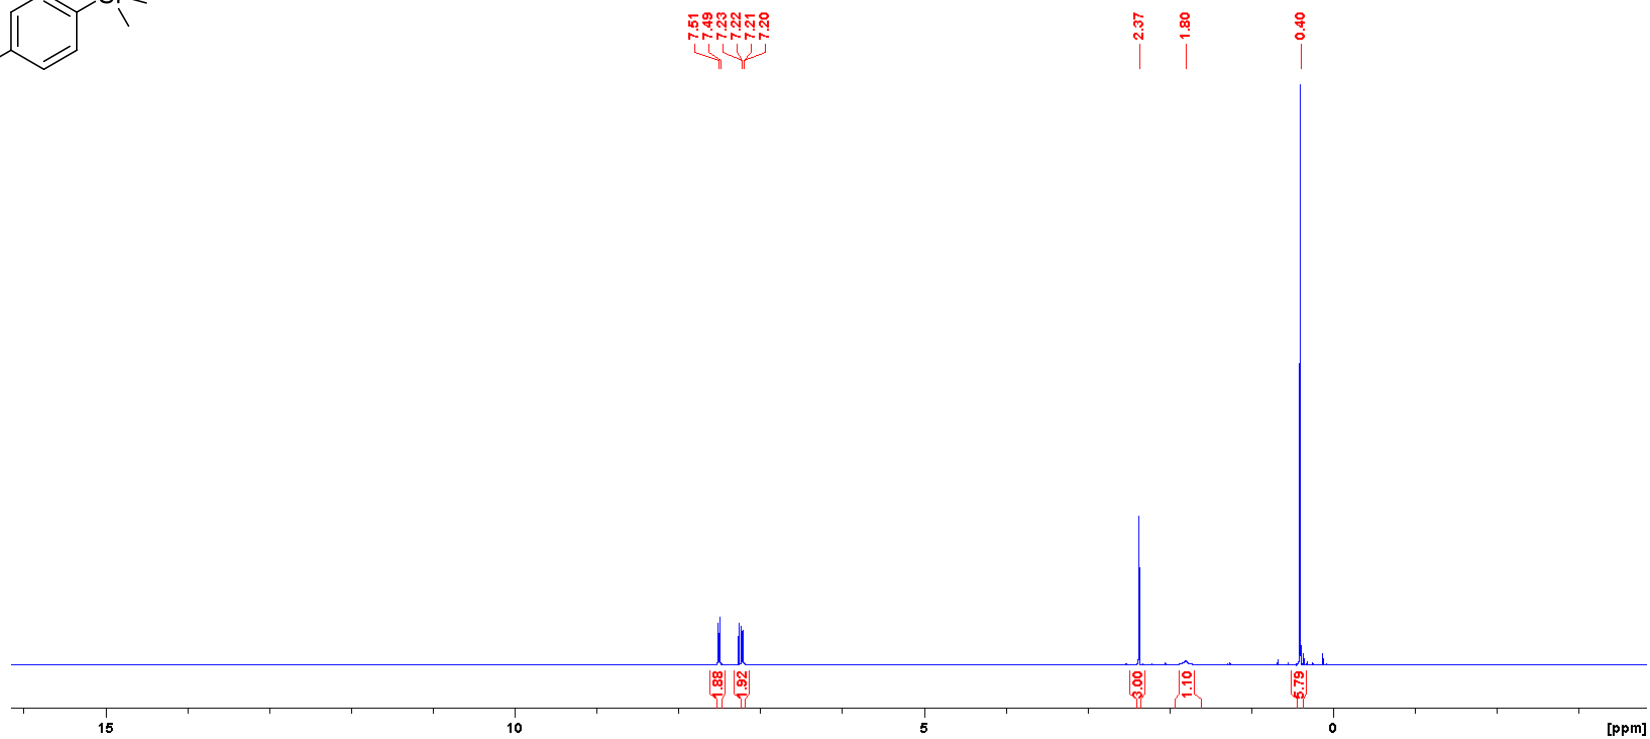

$^{13}\text{C}\{^1\text{H}\}$  NMR (101 MHz,  $\text{CDCl}_3$ ):

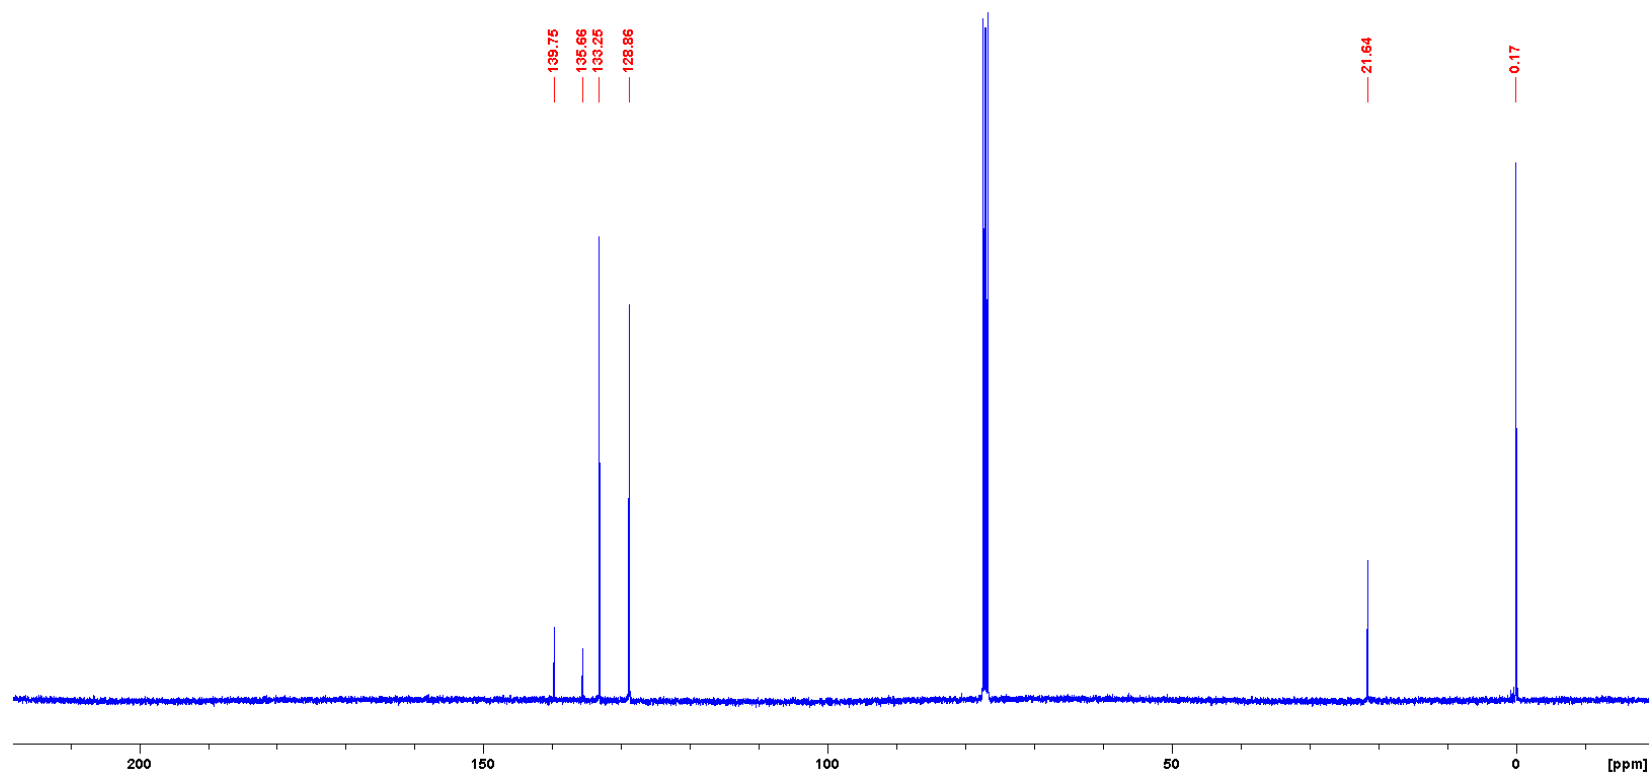



**Dimethyl(thiophen-2-yl)silanol (2g)** $^1\text{H}$  NMR (400 MHz,  $\text{CDCl}_3$ ):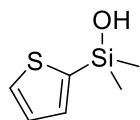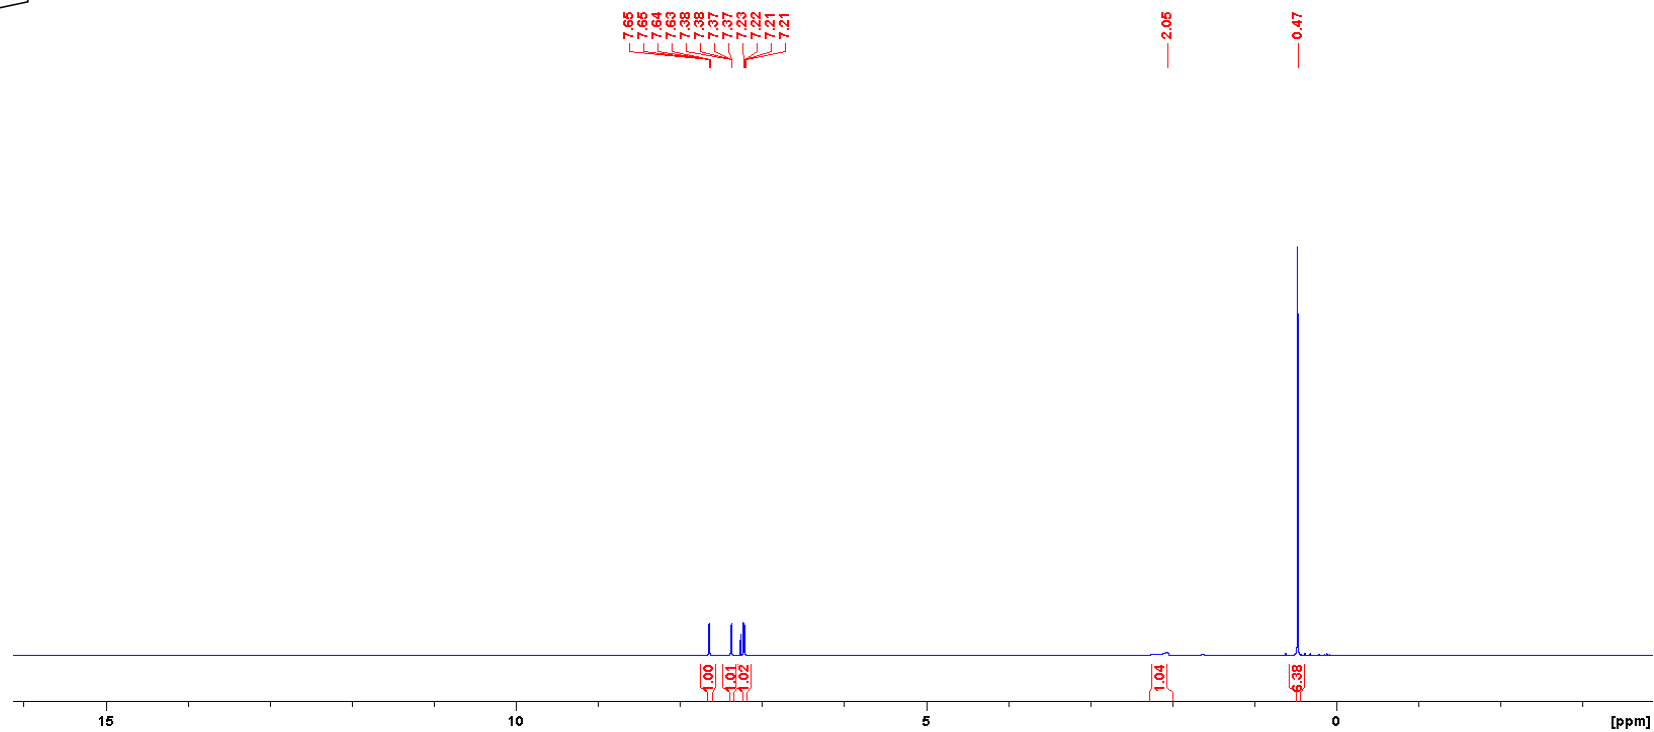

$^{13}\text{C}\{^1\text{H}\}$  NMR (101 MHz,  $\text{CDCl}_3$ ):

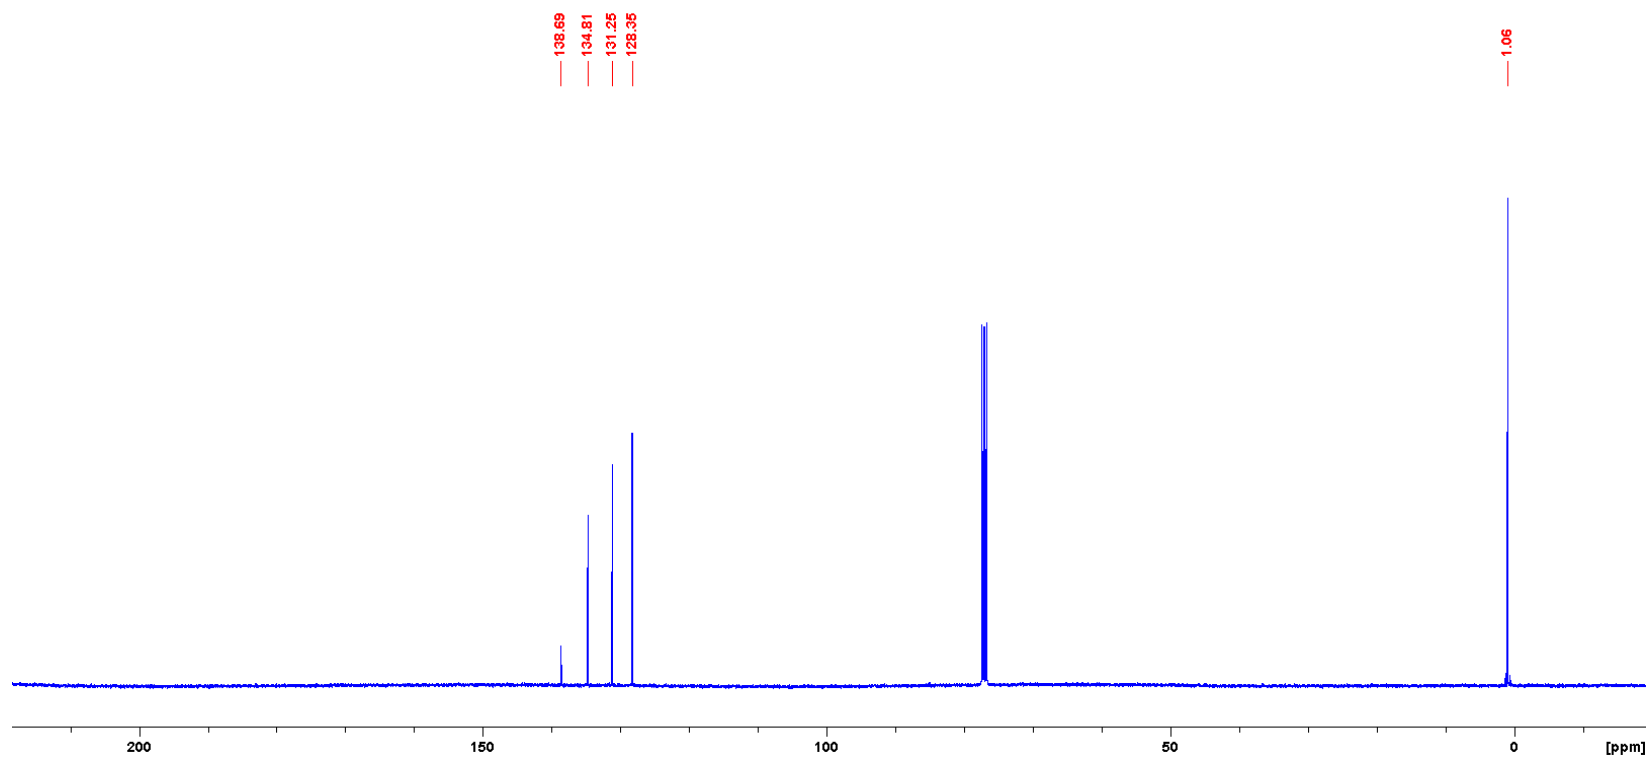

**Methyldiphenylsilanol (2i)**<sup>1</sup>H NMR (400 MHz, CDCl<sub>3</sub>):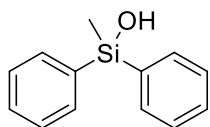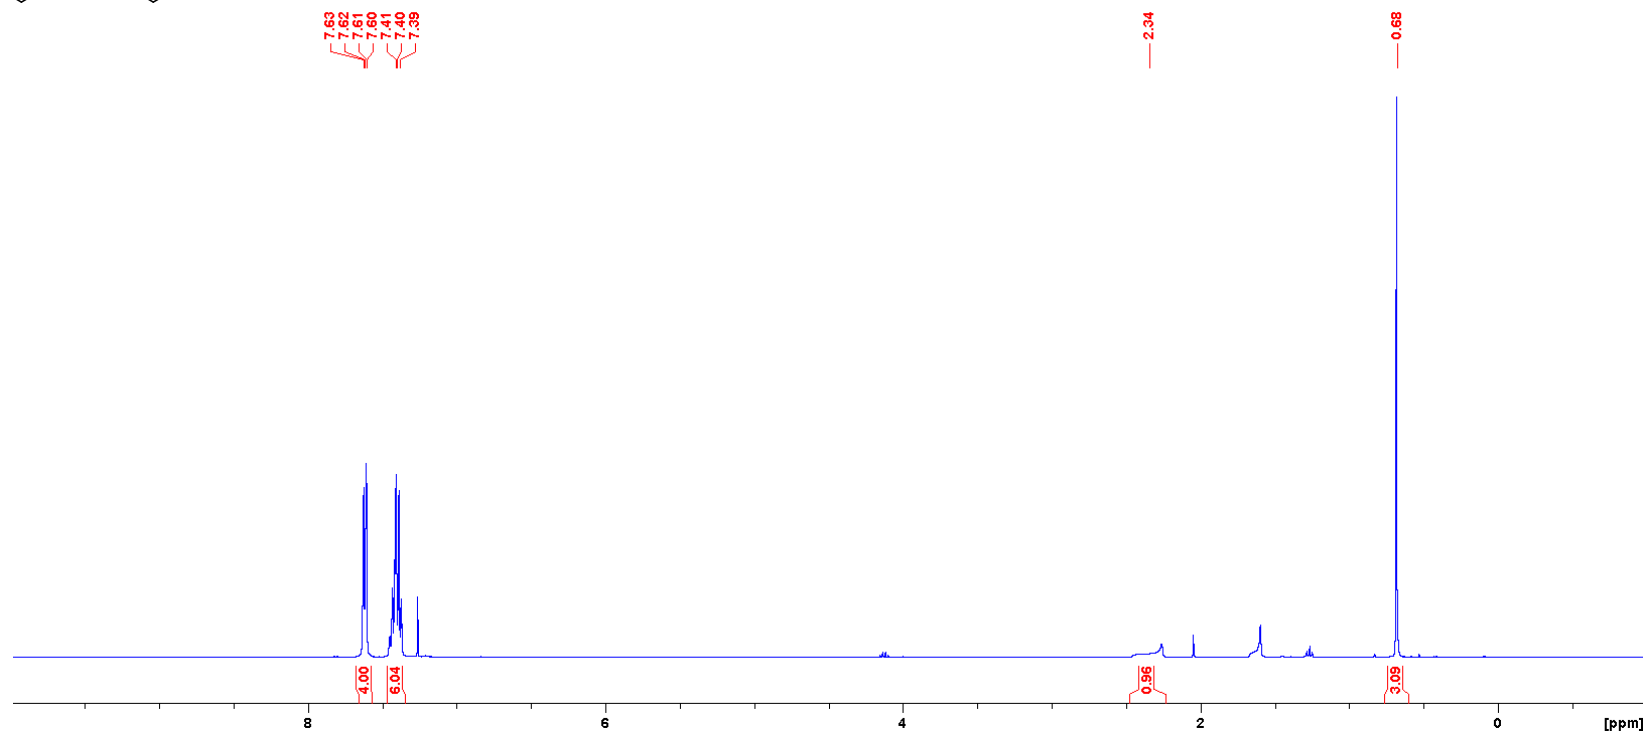

$^{13}\text{C}\{^1\text{H}\}$  NMR (101 MHz,  $\text{CDCl}_3$ ):

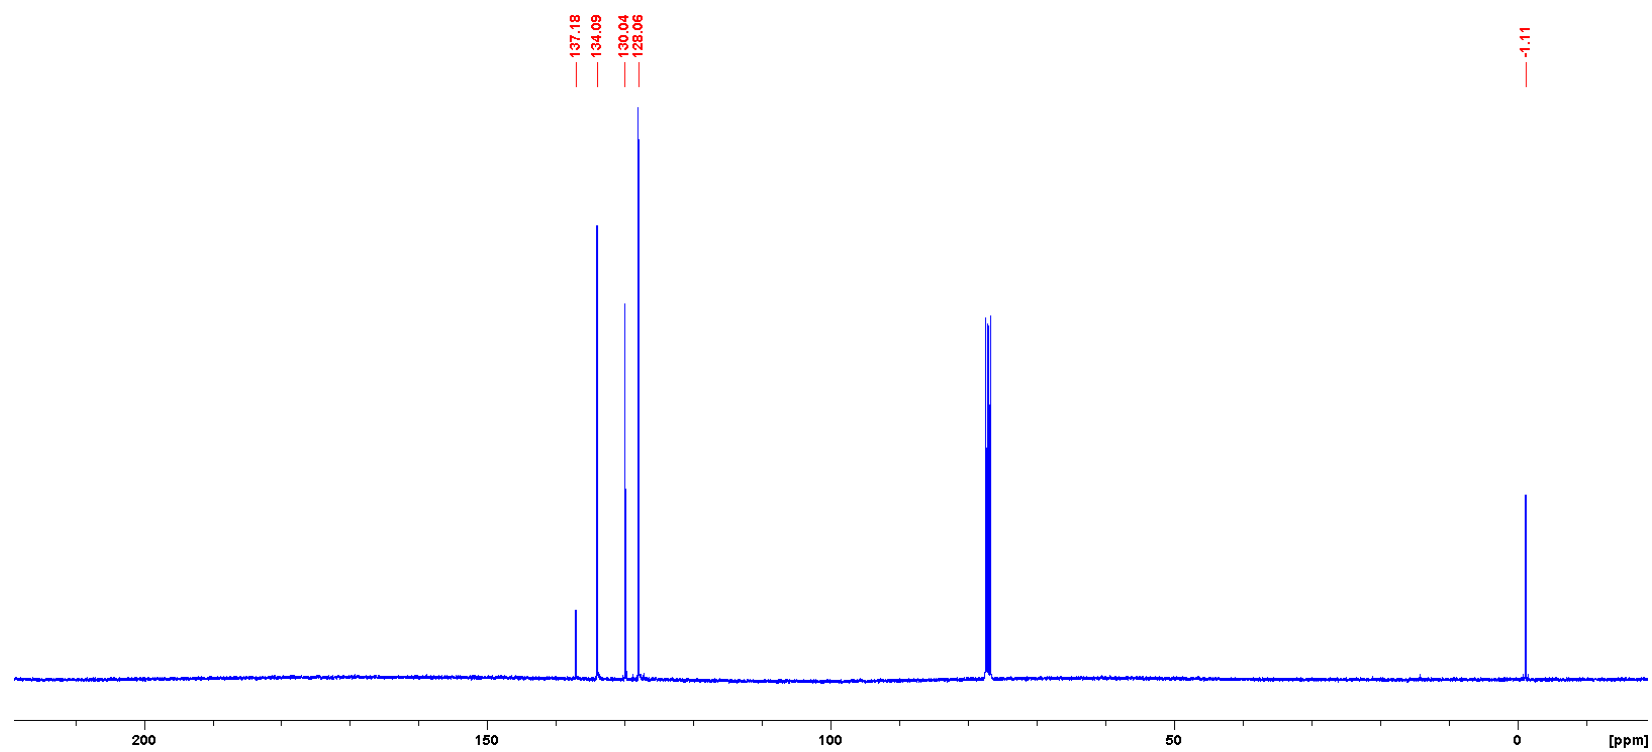

**Triethylsilanol (2j)** $^1\text{H}$  NMR (400 MHz,  $\text{CDCl}_3$ ):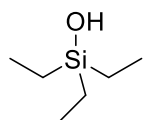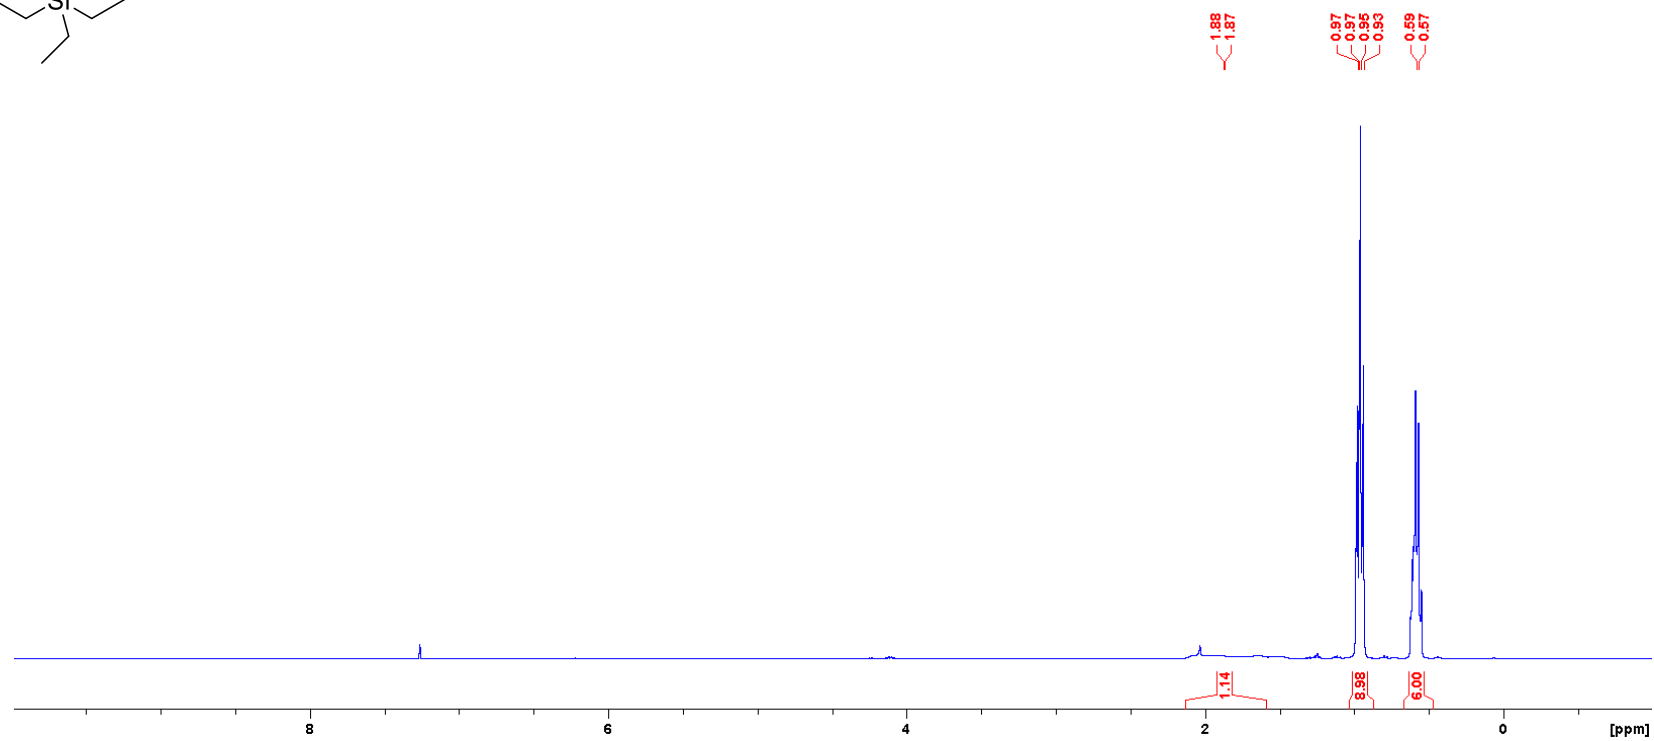

$^{13}\text{C}\{^1\text{H}\}$  NMR (101 MHz,  $\text{CDCl}_3$ ):

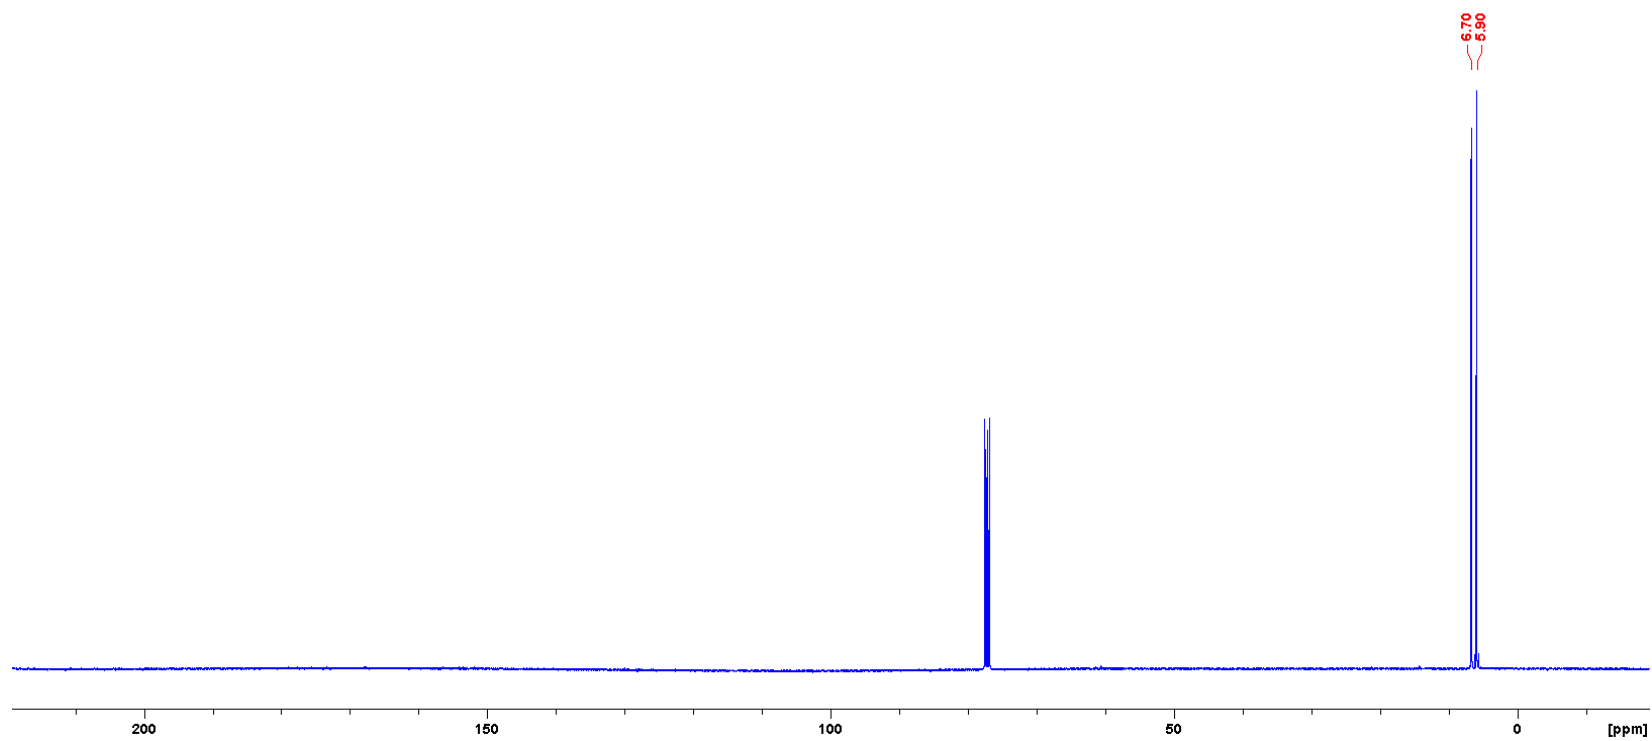

**Butyldimethylsilanol (2k)** $^1\text{H}$  NMR (400 MHz,  $\text{CDCl}_3$ ):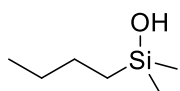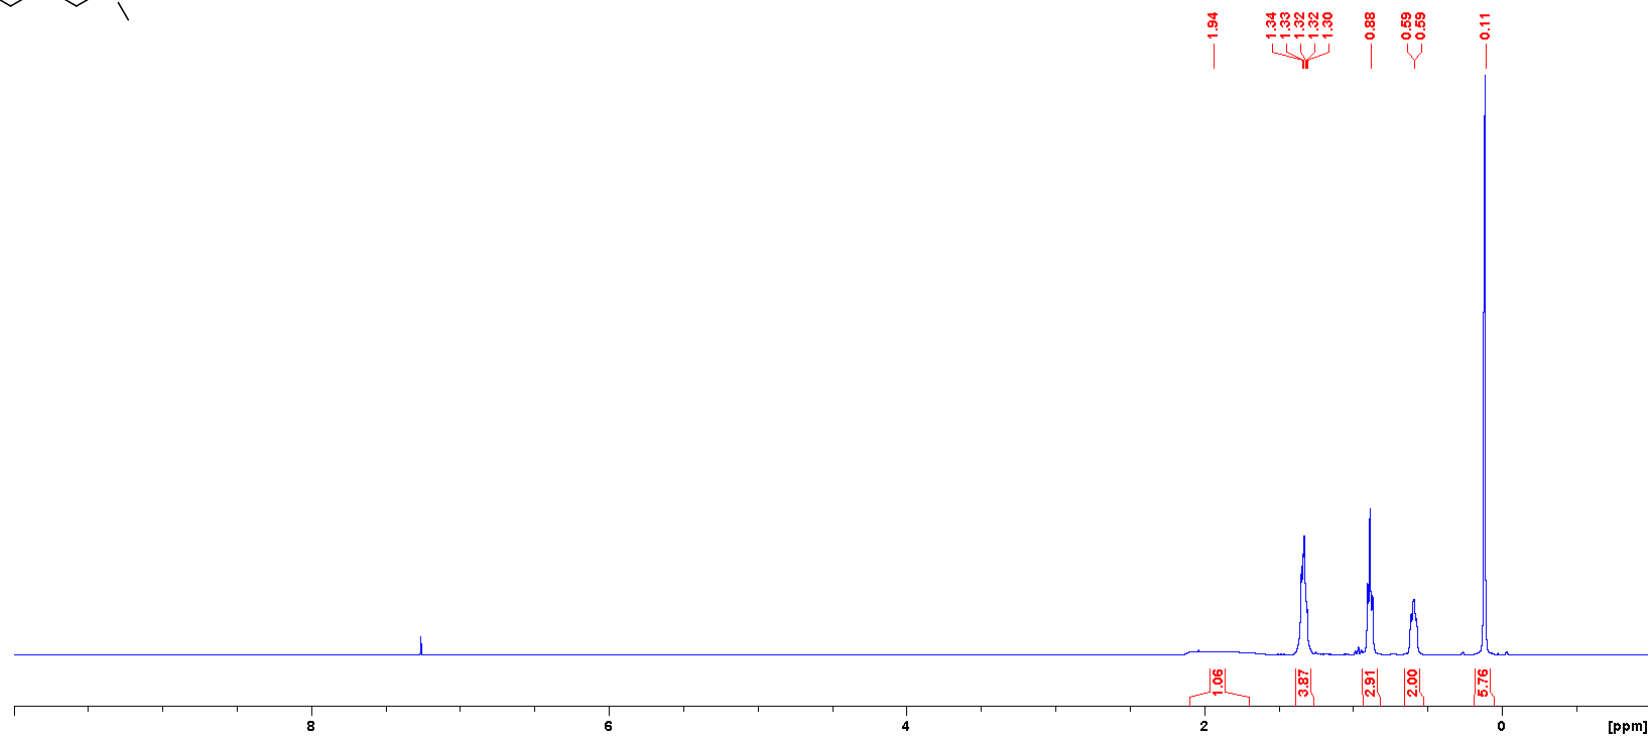

$^{13}\text{C}\{^1\text{H}\}$  NMR (101 MHz,  $\text{CDCl}_3$ ):

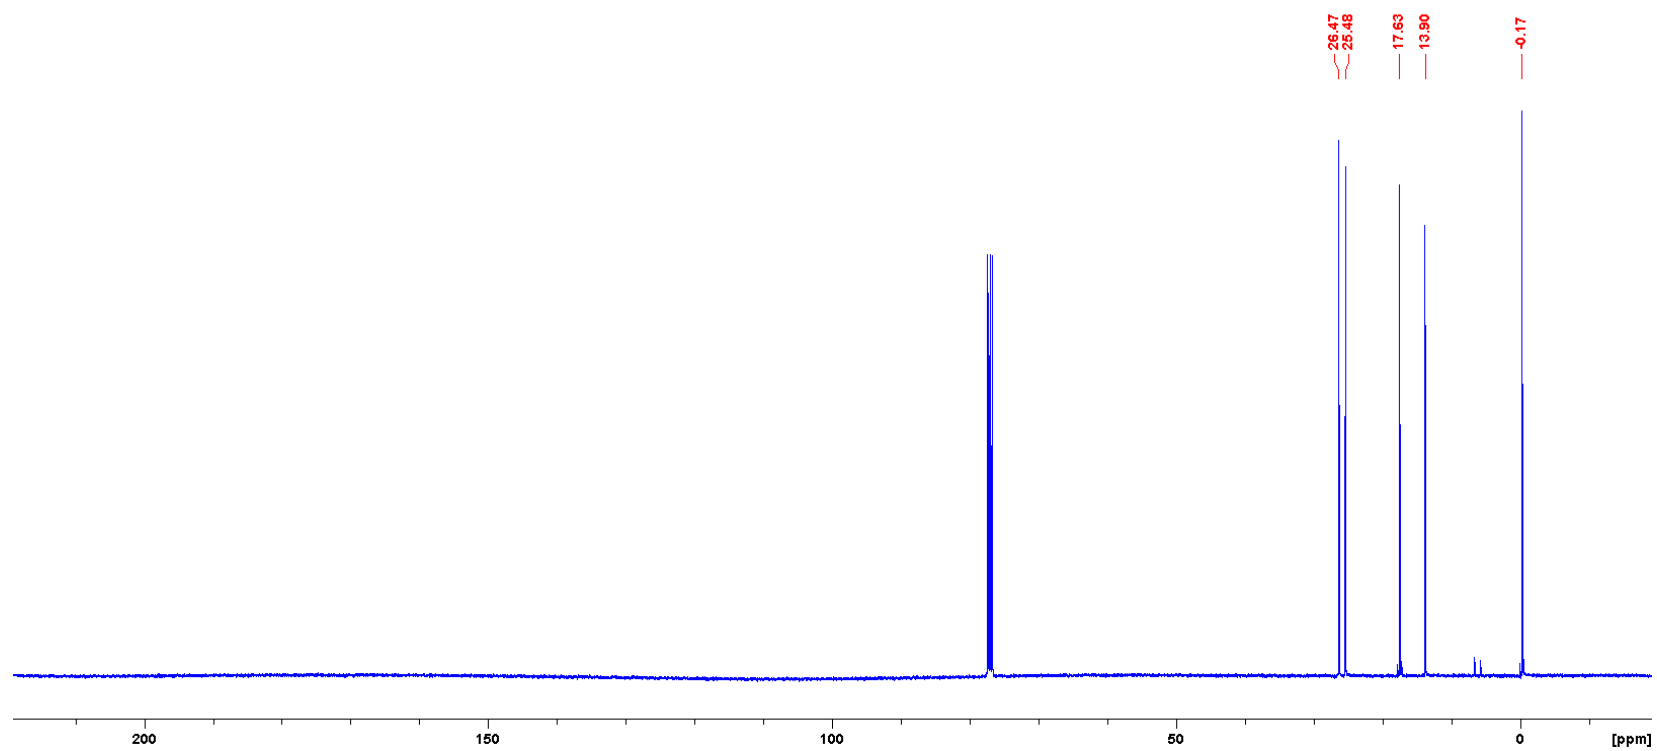



**Pentamethyldisiloxanol (2I)** $^1\text{H}$  NMR (400 MHz,  $\text{CDCl}_3$ ):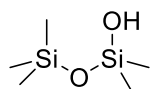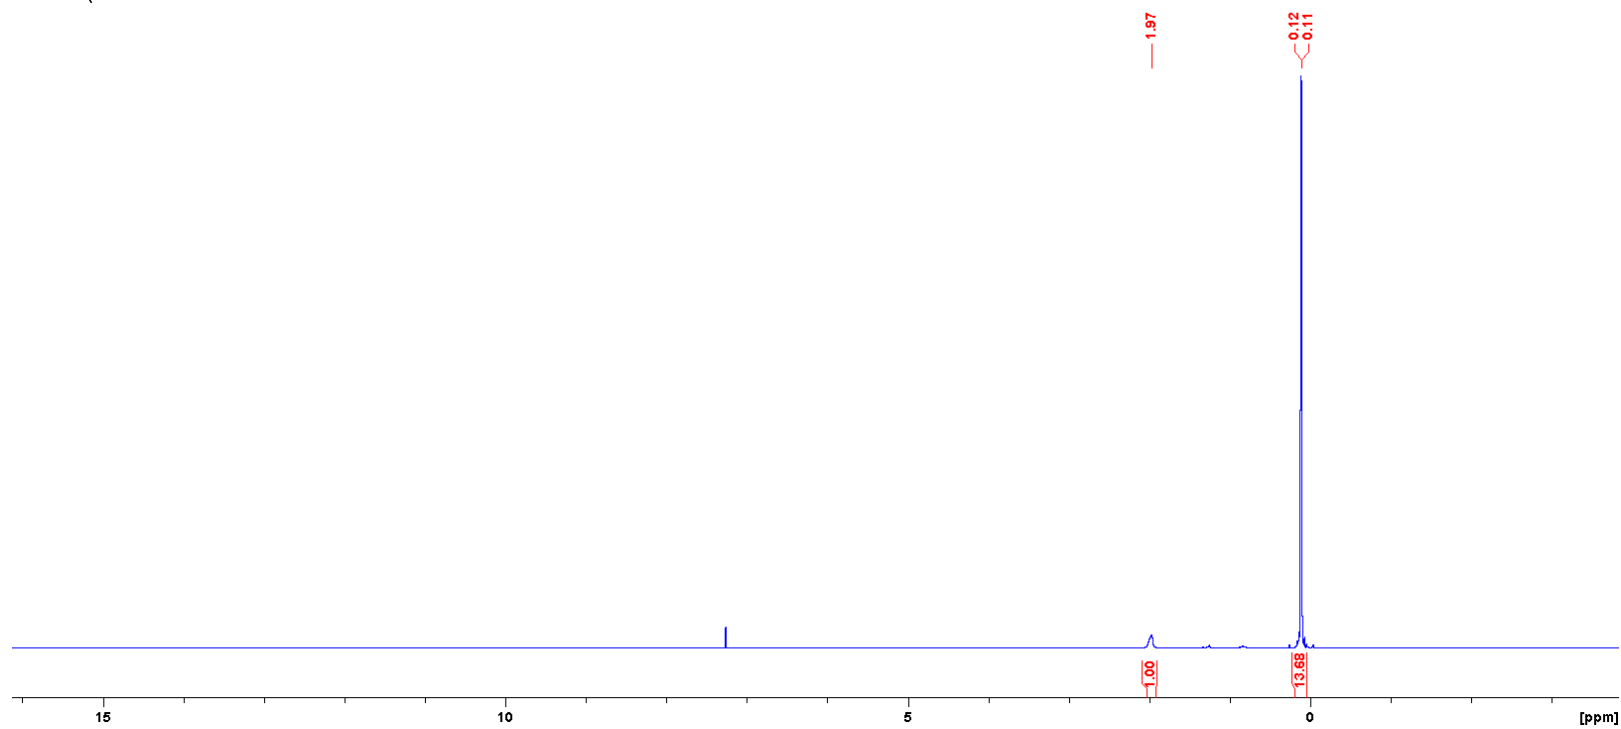

$^{13}\text{C}\{^1\text{H}\}$  NMR (101 MHz,  $\text{CDCl}_3$ ):

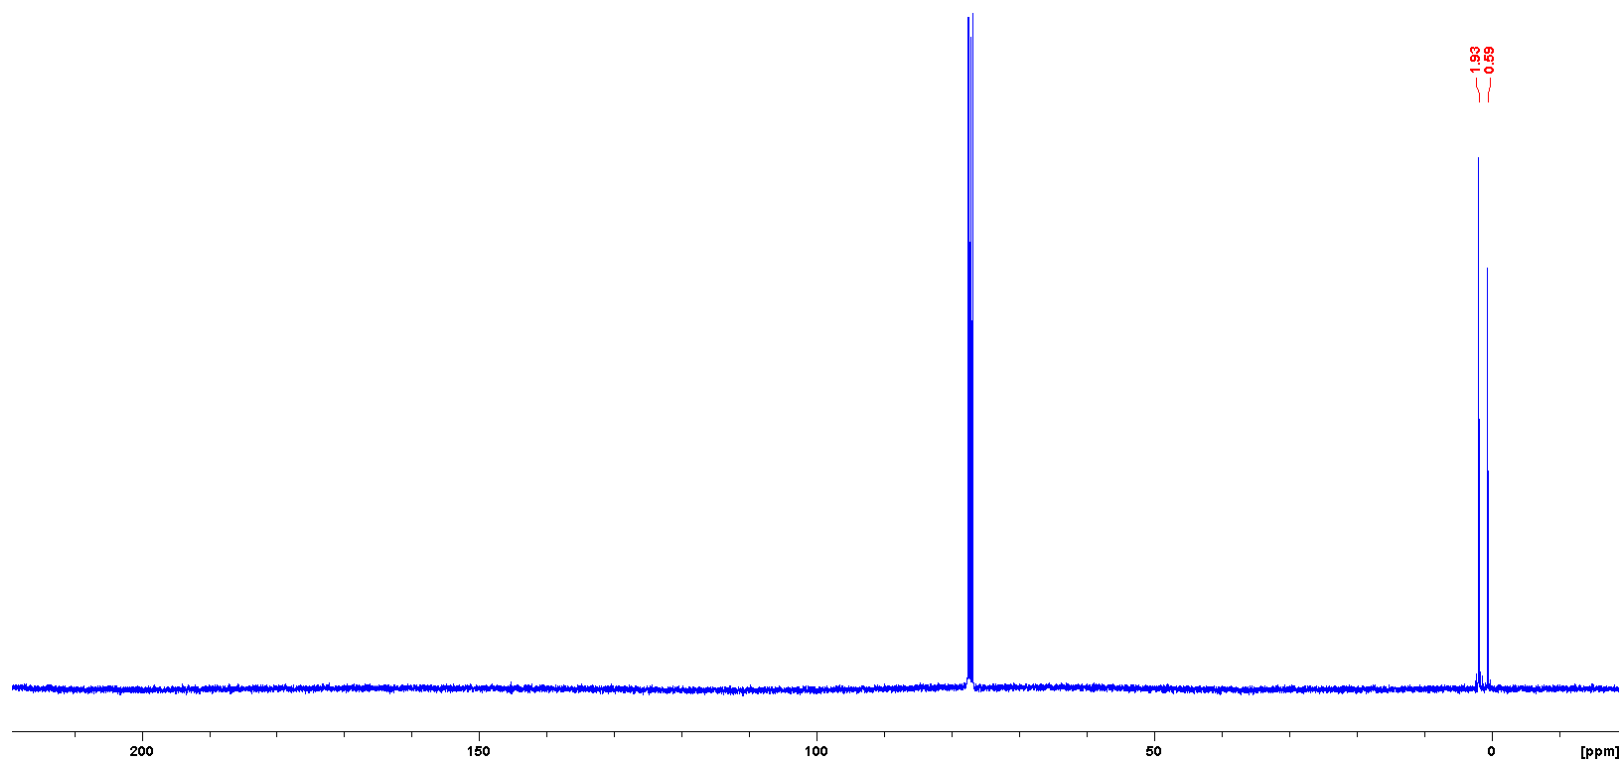

## Computational Methods

### Quantum Mechanics (Density Functional Theory) calculations

Density Functional Theory (DFT) calculations were carried out using Gaussian09.<sup>14</sup> A truncated model containing the porphyrin pyrrole core, Fe center, and a methanethiol to mimic cysteine as Fe-axial ligand was used. Geometry optimizations and frequency calculations were performed using (U)B3LYP<sup>15</sup> functional with the SDD basis set for iron and 6-31G(d) on all other atoms. Transition states had one negative force constant corresponding to the desired reaction coordinate. All stationary points were verified as minima or first-order saddle points by a vibrational frequency analysis. Intrinsic reaction coordinate (IRC) calculations were performed to ensure that the optimized transition states connect the corresponding desired reactants and products. Enthalpies and entropies were calculated for 1 atm and 298.15 K. A correction to the harmonic oscillator approximation, as discussed by Truhlar and co-workers, was also applied to the entropy calculations by raising all frequencies below 100 cm<sup>-1</sup> to 100 cm<sup>-116</sup> using Goodvibes v.1.0.1 python script.<sup>17</sup> Single-point energy calculations were performed using the dispersion-corrected functional (U)B3LYP-D3(BJ)<sup>18</sup> with the Def2TZVP basis set on all atoms. The CPCM polarizable conductor model (diethyl ether,  $\epsilon = 4$ )<sup>19</sup> to have an estimation of the dielectric permittivity in the enzyme active site was used during both the optimizations and single point calculations. The use of a dielectric constant  $\epsilon = 4$  has been proved to be a good and general model to account for electronic polarization and small backbone fluctuations in enzyme active sites.<sup>20</sup> The methodology employed in this study, based on the use of (U)B3LYP density functional, has been extensively proved to accurately perform in the computational modeling of iron-oxo chemistry.<sup>21</sup> Optimized DFT structures are illustrated with CYLView.<sup>22</sup>

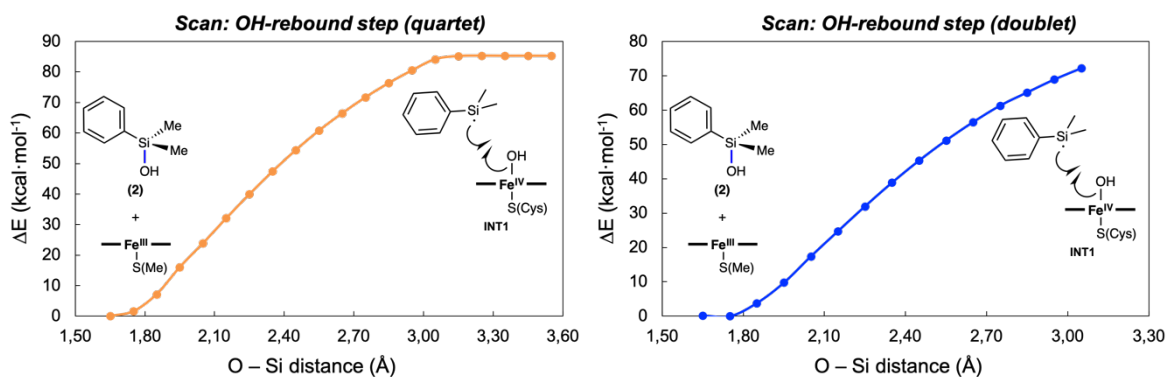

**Figure S1.** Relaxed scan calculations along the new Si–O bond formation coordinate in porphyrin-Fe-oxo catalyzed Si–H oxidations. The scan along the Si–O bond coordinate starts from the radical intermediate (INT1), generated after the first Si–H abstraction step (TS1) considering PhMe<sub>2</sub>SiH (1a) as substrate and considering both quartet and doublet electronic states. Scan calculations show the OH-rebound step (TS2) forms the new Si–O bond during the second step of the reaction mechanism corresponding to a barrierless process that generates the final product 2a.

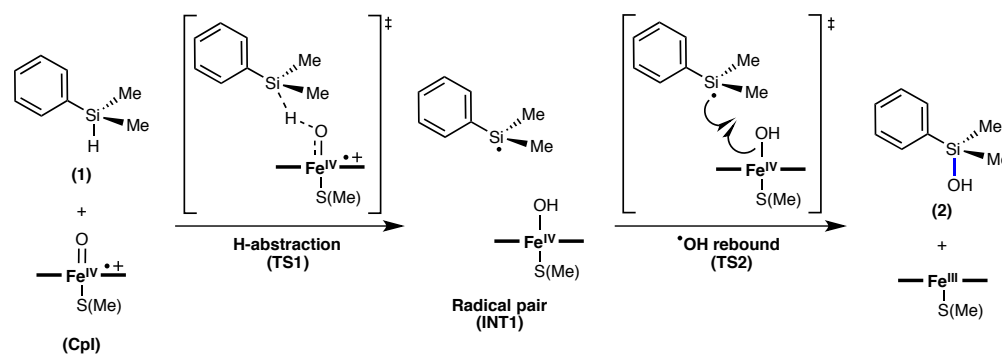

| Substrate                                 | spin state | $\Delta G^\ddagger$ TS1 | $\Delta G$ INT1 | $\Delta E^\ddagger$ TS1 | $\Delta E$ INT1 |
|-------------------------------------------|------------|-------------------------|-----------------|-------------------------|-----------------|
| PhMe <sub>2</sub> SiH<br>(1a)             | doublet    | 20.6                    | 7.0             | 7.0                     | -9.4            |
|                                           | quartet    | <b>18.1</b>             | <b>6.6</b>      | <b>5.2</b>              | <b>-9.3</b>     |
| BnMe <sub>2</sub> SiH                     | doublet    | 20.2                    | <b>8.1</b>      | 6.8                     | -8.3            |
|                                           | quartet    | <b>19.6</b>             | <b>8.4</b>      | <b>6.7</b>              | <b>-7.6</b>     |
| PhSiH <sub>3</sub>                        | doublet    | 21.3                    | 7.1             | 8.9                     | -8.5            |
|                                           | quartet    | <b>19.0</b>             | <b>5.7</b>      | <b>6.4</b>              | <b>-9.6</b>     |
| BnSiH <sub>3</sub>                        | doublet    | 22.0                    | 9.4             | 9.5                     | -6.4            |
|                                           | quartet    | <b>20.7</b>             | <b>8.8</b>      | <b>8.0</b>              | <b>-6.7</b>     |
| Me <sub>2</sub> HSi-O-SiMe <sub>2</sub> H | doublet    | 19.9                    | - <sup>a</sup>  | 6.6                     | - <sup>a</sup>  |
|                                           | quartet    | <b>17.7</b>             | <b>7.6</b>      | <b>4.8</b>              | <b>-8.7</b>     |

<sup>a</sup> Me<sub>2</sub>HSi-O-SiMe<sub>2</sub>H INT1 in the doublet electronic state could not be optimized.

**Figure S2.** Computed Gibbs energy barriers ( $\Delta G^\ddagger$  TS1) and electronic activation barriers ( $\Delta E^\ddagger$  TS1) for the rate-limiting H-abstraction step in porphyrin-Fe-oxo catalyzed Si-H oxidations for different hydrosilane substrates and the corresponding radical intermediate ( $\Delta G$  INT1 and  $\Delta E$  INT1) stabilities. Two electronic states (doublet and quartet) are considered. Electronic and Gibbs energies are given in kcal·mol<sup>-1</sup>.

The phenyl (Ph) group substituent on the silicon center does not help stabilizing the silyl radical as compared to the benzyl (Bn) substituent, because orbital overlap between the phenyl  $\pi$ -aromatic system and the silicon 3p-orbital is difficult due to the long Si-C  $\sigma$ -bond and poor overlap between C<sub>2p</sub> and Si<sub>3p</sub> orbitals (see Ref. 23).

**Figure S3.** DFT optimized geometries for the lowest in energy H-abstraction transition states (**TS1**) and radical intermediates (**INT1**) of porphyrin-Fe-oxo catalyzed Si–H oxidation reactions involving **a)**  $\text{BnMe}_2\text{SiH}$  and **b)**  $\text{Me}_2\text{HSi–O–SiMe}_2\text{H}$  substrates. Distances are given in Å, angles in degrees, and spin densities ( $\rho_{\text{spin}}(\text{Si})$ ) in atomic units.

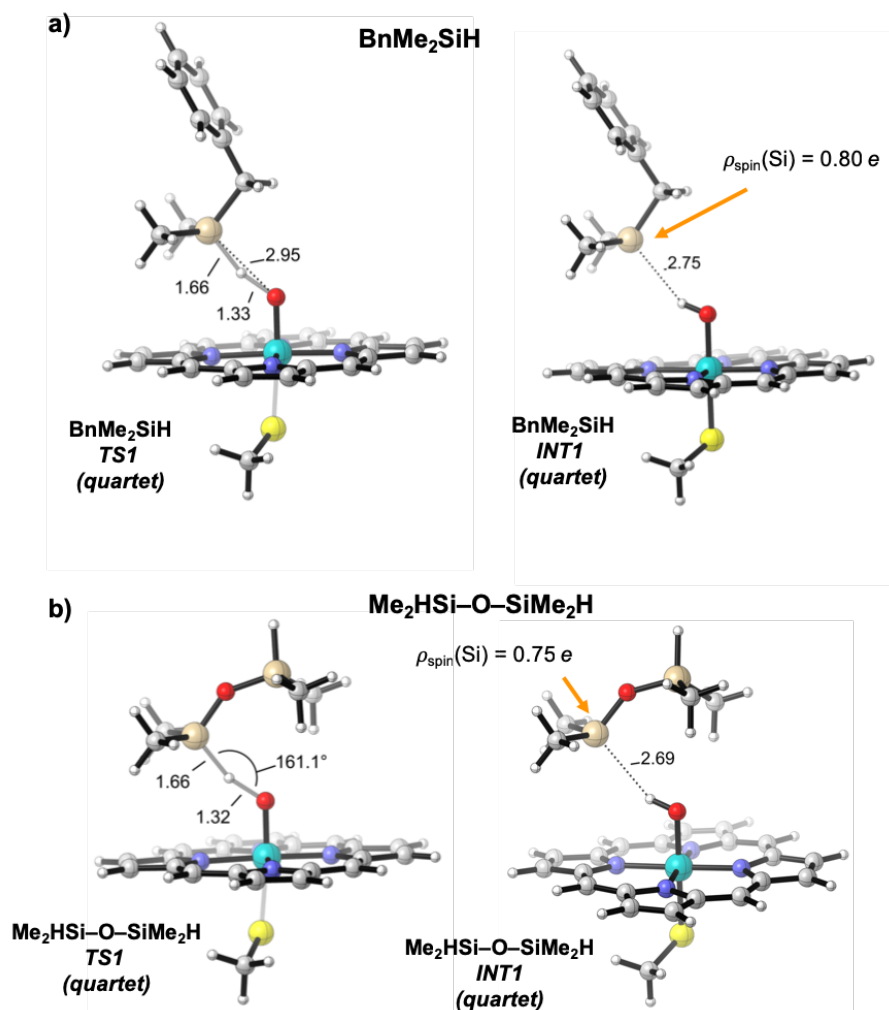

**Figure S4.** Spin density distribution in DFT optimized lowest in energy H-abstraction transition states (**TS1**) and radical intermediates (**INT1**) considering a)  $\text{PhMe}_2\text{SiH}$  (**1a**), b)  $\text{BnMe}_2\text{SiH}$  (**1d**), and c)  $\text{Me}_2\text{HSi-O-SiMe}_2\text{H}$  as substrates. Spin density in the intermediate is highly localized on the Si atom, without delocalization on the neighboring substituents.

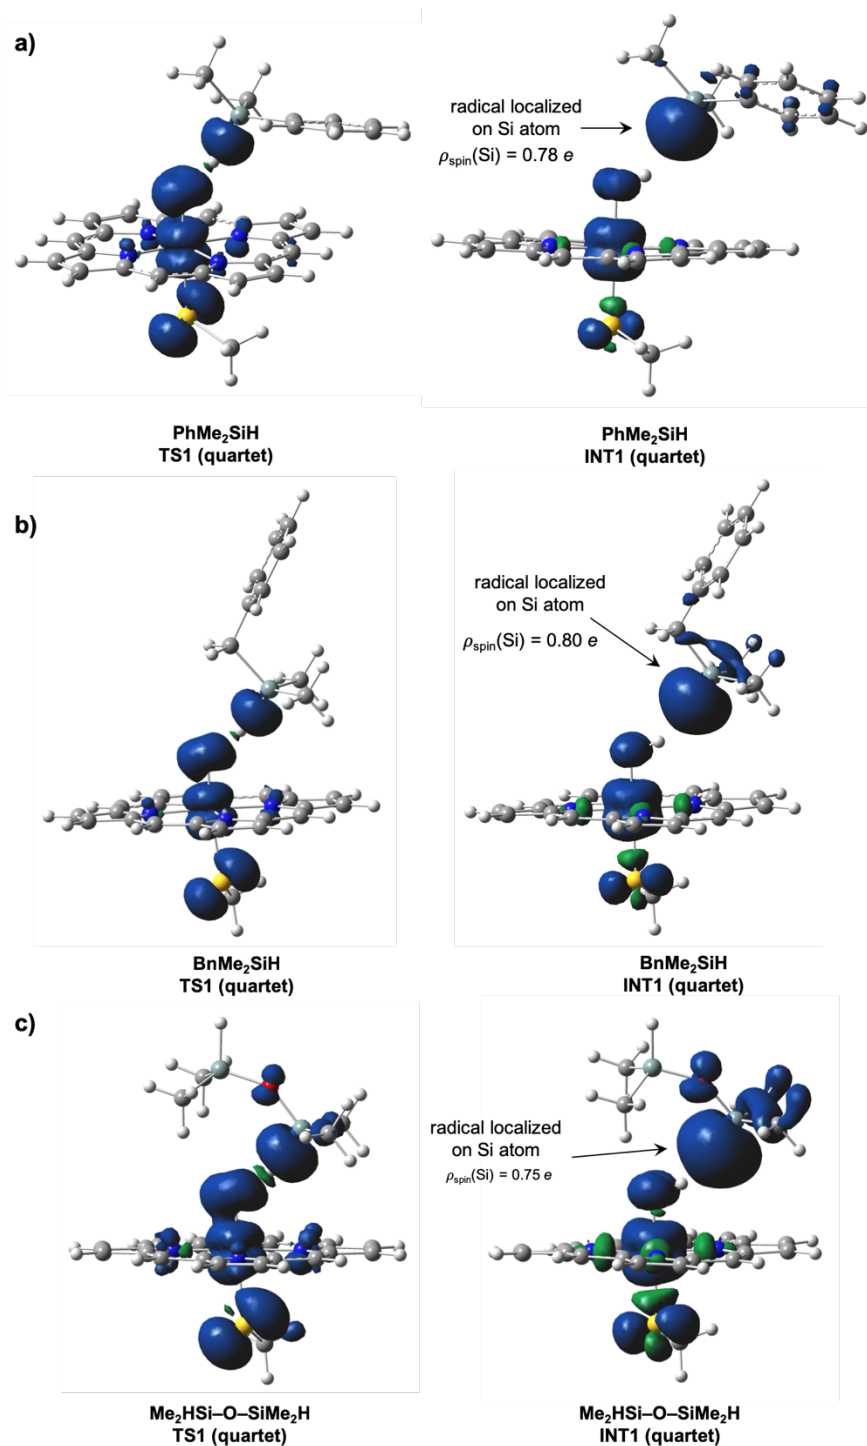

**Figure S5.** Bond Dissociation Energies (BDE) for selected X–H (X = Si, C) bonds computed at (U)B3LYP/Def2TZVP // (U)B3LYP/6-31G(d)+SDD(Fe) level. BDE is defined as the change in enthalpy,  $\Delta H$ , for homolysis of the X–H bond:  $\Delta H \quad \text{X-H(g)} \rightarrow \text{A}^{\cdot}(\text{g}) + \text{X}^{\cdot}(\text{g})$

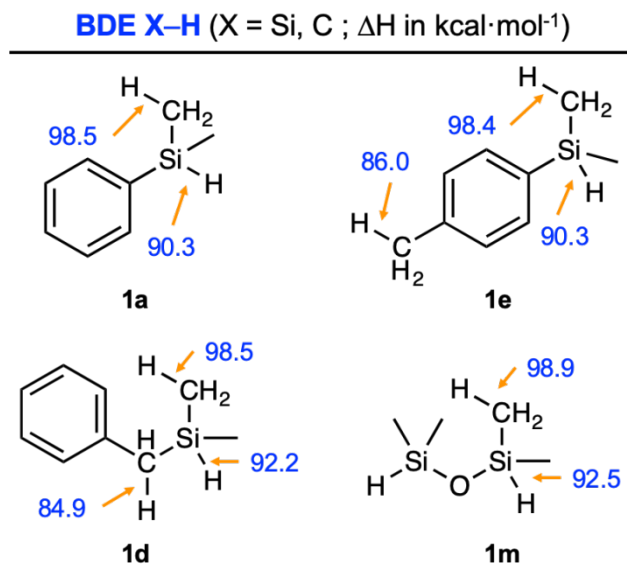

Direct conjugation of the methyl group to the phenyl ring decreases the computed C–H BDE by ca. 12 kcal·mol<sup>-1</sup> (BDE = 86.0 kcal·mol<sup>-1</sup> for PhCH<sub>2</sub>–H in **1e**; and BDE = 98.4 kcal·mol<sup>-1</sup> for PhHSi(CH<sub>3</sub>)CH<sub>2</sub>–H in **1e**).

Direct conjugation of the silyl group to the phenyl ring decreases the computed Si–H BDE by only ca. 2 kcal·mol<sup>-1</sup> (BDE = 90.3 kcal·mol<sup>-1</sup> for **1a** and **1e**; BDE = 92.2 and 92.5 kcal·mol<sup>-1</sup> for **1d** and **1m**, respectively).

The high chemoselectivity observed for enzymatic Si–H oxidations over other possible C–H oxidations can be directly attributed to the lower bond dissociation energies (BDE) of the Si–H bonds as compared to the sterically accessible C–H bonds from neighboring Si–Me groups.

On the other hand, lower BDEs are found for C–H bonds directly conjugated to the phenyl ring (in **1d** and **1e**), as compared to Si–H ones. The latter indicates that the enzyme active site is preventing the substrates to bind in catalytic poses that could allow the remote *para*-CH<sub>3</sub> group in **1e**, and the sterically hindered benzylic CH<sub>2</sub> group in **1d**, to be close enough to the catalytic Fe-oxo to react with it through an H-abstraction TS.



**Table S10. Energies of all DFT optimized structures.** Energies and thermochemistry parameters (at T = 298.15 K and P = 1 atm) of all computationally characterized stationary points: Electronic energies (E), electronic energies from high level single point calculations (E (SP)), Zero point energy (ZPE), enthalpy (H), entropic term (T·S), quasi-harmonic corrected entropic term (T·S-qh), free energy (G(T)), quasi-harmonic corrected free energy (G(T)-qh). All energies are given in a.u.

| Structure                            | E/au             | ZPE/au       | H/au             | T.S/au       | T.qh-S/au | G(T)/au          | qh-G(T)/au       | E/au SP             |
|--------------------------------------|------------------|--------------|------------------|--------------|-----------|------------------|------------------|---------------------|
| BnMe <sub>2</sub> SiH - INT1 doublet | -<br>2266.515737 | 0.52120<br>2 | -<br>2265.956618 | 0.11258<br>2 | 0.099124  | -<br>2266.069200 | -<br>2266.055742 | -<br>3407.159543370 |
| BnMe <sub>2</sub> SiH - INT1 quartet | -<br>2266.515328 | 0.52124<br>3 | -<br>2265.956057 | 0.11495<br>4 | 0.099965  | -<br>2266.071011 | -<br>2266.056022 | -<br>3407.158322640 |
| BnMe <sub>2</sub> SiH - TS1 doublet  | -<br>2266.493424 | 0.51597<br>6 | -<br>2265.940412 | 0.10915<br>5 | 0.097840  | -<br>2266.049567 | -<br>2266.038253 | -<br>3407.135394300 |
| BnMe <sub>2</sub> SiH - TS1 quartet  | -<br>2266.494717 | 0.51566<br>1 | -<br>2265.942104 | 0.11004<br>5 | 0.098343  | -<br>2266.052149 | -<br>2266.040447 | -<br>3407.135559810 |
| Fe-OH reduced, doublet               | -<br>1626.402321 | 0.32759<br>1 | -<br>1626.050823 | 0.07444<br>9 | 0.072655  | -<br>1626.125272 | -<br>1626.123478 | -<br>2766.825006130 |
| Fe-OH singlet                        | -<br>1626.234697 | 0.32923<br>3 | -<br>1625.882021 | 0.07249<br>3 | 0.071021  | -<br>1625.954514 | -<br>1625.953041 | -<br>2766.655548200 |
| Fe-OH triplet                        | -<br>1626.258064 | 0.32843<br>1 | -<br>1625.905521 | 0.07572<br>0 | 0.073366  | -<br>1625.981240 | -<br>1625.978886 | -<br>2766.677979470 |
| Fe-oxo doublet                       | -<br>1625.614413 | 0.31763<br>7 | -<br>1625.273163 | 0.07466<br>4 | 0.072514  | -<br>1625.347827 | -<br>1625.345677 | -<br>2766.021307700 |
| Fe-oxo quartet                       | -<br>1625.614147 | 0.31767<br>8 | -<br>1625.272893 | 0.07524<br>7 | 0.073058  | -<br>1625.348140 | -<br>1625.345951 | -<br>2766.020965580 |
| PhMe <sub>2</sub> SiH - INT1 doublet | -<br>2227.202345 | 0.49354<br>2 | -<br>2226.672235 | 0.10877<br>3 | 0.096662  | -<br>2226.781008 | -<br>2226.768898 | -<br>3367.823277960 |
| PhMe <sub>2</sub> SiH - INT1 quartet | -<br>2227.202138 | 0.49338<br>7 | -<br>2226.672003 | 0.11133<br>1 | 0.097534  | -<br>2226.783333 | -<br>2226.769537 | -<br>3367.823089250 |
| PhMe <sub>2</sub> SiH - TS1 doublet  | -<br>2227.178279 | 0.48846<br>3 | -<br>2226.654173 | 0.10566<br>8 | 0.095097  | -<br>2226.759840 | -<br>2226.749270 | -<br>3367.797101390 |
| PhMe <sub>2</sub> SiH - TS1 quartet  | -<br>2227.179828 | 0.48801<br>6 | -<br>2226.656282 | 0.10404<br>7 | 0.095603  | -<br>2226.760329 | -<br>2226.751885 | -<br>3367.799972480 |
| [BnMe <sub>2</sub> Si] <sup>+</sup>  | -640.096402      | 0.19448<br>0 | -639.889780      | 0.04907<br>2 | 0.048272  | -639.938852      | -639.938052      | -640.306612183      |

|                                                                |                  |              |                  |              |          |                  |                  |                     |
|----------------------------------------------------------------|------------------|--------------|------------------|--------------|----------|------------------|------------------|---------------------|
| [BnMe <sub>2</sub> Si] <sup>-</sup>                            | -640.253956      | 0.19261<br>9 | -640.048831      | 0.05147<br>0 | 0.049682 | -640.100301      | -640.098513      | -640.469745873      |
| benzyl(dimethyl)silane ( <b>1d</b> ,)<br>BnMe <sub>2</sub> SiH | -640.906867      | 0.20171<br>8 | -640.692558      | 0.05086<br>0 | 0.049021 | -640.743419      | -640.741579      | -641.124964833      |
| [PhMe <sub>2</sub> Si] <sup>+</sup>                            | -600.784131      | 0.16603<br>7 | -600.606928      | 0.04722<br>9 | 0.046601 | -600.654157      | -600.653529      | -600.973221168      |
| [PhMe <sub>2</sub> Si] <sup>-</sup>                            | -600.940985      | 0.16471<br>4 | -600.765024      | 0.04828<br>3 | 0.047177 | -600.813307      | -600.812201      | -601.134044453      |
| phenyldimethylsilane ( <b>1a</b> ), PhMe <sub>2</sub> SiH      | -601.591838      | 0.17387<br>4 | -601.406626      | 0.04789<br>5 | 0.046455 | -601.454522      | -601.453081      | -601.786939477      |
| Me <sub>2</sub> HSi-O-SiMe <sub>2</sub> H - TS1 doublet        | -<br>2440.785437 | 0.48440<br>3 | -<br>2440.263976 | 0.10562<br>3 | 0.098096 | -<br>2440.369598 | -<br>2440.362072 | -<br>3581.419541110 |
| Me <sub>2</sub> HSi-O-SiMe <sub>2</sub> H - TS1 quartet        | -<br>2440.785424 | 0.48484<br>4 | -<br>2440.262687 | 0.11055<br>0 | 0.100144 | -<br>2440.373238 | -<br>2440.362831 | -<br>3581.422328230 |
| [Me <sub>2</sub> HSi-O-SiMe <sub>2</sub> ] <sup>-</sup>        | -814.542275      | 0.16139<br>2 | -814.367166      | 0.05506<br>8 | 0.051578 | -814.422234      | -814.418744      | -814.751928188      |
| Me <sub>2</sub> HSi-O-SiMe <sub>2</sub> H                      | -815.196441      | 0.17066<br>0 | -815.011982      | 0.05511<br>8 | 0.050839 | -815.067100      | -815.062821      | -815.408718805      |
| Me <sub>2</sub> HSi-O-SiMe <sub>2</sub> H - INT1 quartet       | -<br>2440.805027 | 0.49057<br>4 | -<br>2440.275584 | 0.11537<br>2 | 0.101398 | -<br>2440.390956 | -<br>2440.376982 | -<br>3581.443857210 |
| PhSiH <sub>3</sub> - INT1 doublet                              | -<br>2148.549811 | 0.43473<br>6 | -<br>2148.081819 | 0.10286<br>7 | 0.090054 | -<br>2148.184686 | -<br>2148.171873 | -<br>3289.122346540 |
| PhSiH <sub>3</sub> - INT1 quartet                              | -<br>2148.549841 | 0.43482<br>0 | -<br>2148.081824 | 0.10259<br>7 | 0.090524 | -<br>2148.184421 | -<br>2148.172349 | -<br>3289.124151320 |
| PhSiH <sub>3</sub> - TS1 doublet                               | -<br>2148.526152 | 0.42902<br>2 | -<br>2148.064997 | 0.09775<br>1 | 0.088230 | -<br>2148.162749 | -<br>2148.153228 | -<br>3289.094705590 |
| PhSiH <sub>3</sub> - TS1 quartet                               | -<br>2148.526745 | 0.42956<br>1 | -<br>2148.065331 | 0.09678<br>3 | 0.088233 | -<br>2148.162115 | -<br>2148.153565 | -<br>3289.098690270 |
| BnSiH <sub>3</sub> - INT1 doublet                              | -<br>2187.863145 | 0.46270<br>1 | -<br>2187.365858 | 0.10690<br>5 | 0.092786 | -<br>2187.472762 | -<br>2187.458643 | -<br>3328.456585310 |
| BnSiH <sub>3</sub> - INT1 quartet                              | -<br>2187.863014 | 0.46277<br>9 | -<br>2187.365653 | 0.10815<br>9 | 0.093421 | -<br>2187.473812 | -<br>2187.459074 | -<br>3328.457060480 |
| BnSiH <sub>3</sub> - TS1 doublet                               | -<br>2187.841236 | 0.45688<br>1 | -<br>2187.350872 | 0.10134<br>7 | 0.091040 | -<br>2187.452219 | -<br>2187.441912 | -<br>3328.431325750 |
| BnSiH <sub>3</sub> - TS1 quartet                               | -<br>2187.841758 | 0.45728<br>7 | -<br>2187.351163 | 0.10127<br>8 | 0.091173 | -<br>2187.452441 | -<br>2187.442336 | -<br>3328.433621740 |

|                    |             |              |             |              |          |             |             |                |
|--------------------|-------------|--------------|-------------|--------------|----------|-------------|-------------|----------------|
| PhSiH <sub>3</sub> | -522.937826 | 0.11555<br>7 | -522.814280 | 0.04057<br>0 | 0.039009 | -522.854849 | -522.853288 | -523.087513806 |
| BnSiH <sub>3</sub> | -562.253712 | 0.14355<br>6 | -562.101001 | 0.04287<br>0 | 0.041952 | -562.143871 | -562.142953 | -562.425103201 |

Table S11. Cartesian coordinates of optimized stationary points. XYZ structures

Fe-oxo doublet

|    |          |          |          |
|----|----------|----------|----------|
| Fe | 0.09068  | 0.04068  | -0.37939 |
| N  | 1.83605  | -0.95266 | -0.13980 |
| N  | -0.89460 | -1.72644 | -0.26448 |
| N  | 1.05836  | 1.79050  | -0.13876 |
| N  | -1.67215 | 1.01450  | -0.29077 |
| C  | 3.08986  | -0.39855 | -0.03343 |
| C  | -2.25773 | -1.91646 | -0.32449 |
| C  | 2.02949  | -2.30951 | -0.20327 |
| C  | -0.33662 | -2.98888 | -0.30988 |
| C  | 2.41247  | 1.97551  | -0.02837 |
| C  | -2.92496 | 0.46144  | -0.36070 |
| C  | 0.50933  | 3.04679  | -0.17617 |
| C  | -1.86043 | 2.37699  | -0.31610 |
| C  | 4.09459  | -1.43348 | -0.01736 |
| C  | -2.56321 | -3.32535 | -0.37428 |
| C  | 3.43656  | -2.61979 | -0.13012 |
| C  | -1.37430 | -3.98778 | -0.37116 |
| C  | 2.72585  | 3.38297  | 0.01082  |
| C  | -3.92886 | 1.49569  | -0.41868 |
| C  | 1.54214  | 4.04953  | -0.08544 |
| C  | -3.26727 | 2.68562  | -0.39240 |
| H  | 5.15897  | -1.25569 | 0.06688  |
| H  | -3.56427 | -3.73506 | -0.41559 |
| H  | 3.84700  | -3.62104 | -0.15463 |
| H  | -1.19645 | -5.05491 | -0.40603 |
| H  | 3.72545  | 3.78847  | 0.09999  |
| H  | -4.99492 | 1.31577  | -0.47166 |
| H  | 1.36532  | 5.11737  | -0.09009 |
| H  | -3.67640 | 3.68738  | -0.41901 |
| C  | 3.36165  | 0.96044  | 0.03249  |
| C  | -3.20406 | -0.90259 | -0.36357 |
| C  | -0.84991 | 3.32642  | -0.26413 |
| C  | 1.02069  | -3.26252 | -0.29772 |
| H  | 4.40215  | 1.25703  | 0.12022  |
| H  | -4.24738 | -1.19695 | -0.42043 |
| H  | -1.14425 | 4.37100  | -0.28694 |
| H  | 1.32109  | -4.30445 | -0.34481 |
| O  | 0.16369  | 0.04653  | -2.00171 |
| S  | -0.02840 | -0.38366 | 2.20800  |
| C  | -1.71003 | -0.04437 | 2.80906  |
| H  | -2.41412 | -0.73229 | 2.32525  |
| H  | -1.74465 | -0.22260 | 3.88791  |
| H  | -2.01527 | 0.98066  | 2.58484  |

Fe-oxo quartet

|    |          |          |          |
|----|----------|----------|----------|
| Fe | 0.08915  | 0.03752  | -0.38148 |
| N  | 1.84386  | -0.93800 | -0.14395 |
| N  | -0.87793 | -1.73359 | -0.26855 |
| N  | 1.04202  | 1.79902  | -0.13287 |
| N  | -1.68226 | 0.99739  | -0.29264 |
| C  | 3.09253  | -0.37167 | -0.03502 |

|   |          |          |          |
|---|----------|----------|----------|
| C | -2.24030 | -1.93627 | -0.32358 |
| C | 2.05071  | -2.29267 | -0.20696 |
| C | -0.30896 | -2.99200 | -0.30818 |
| C | 2.39414  | 1.99619  | -0.02474 |
| C | -2.92998 | 0.43436  | -0.36525 |
| C | 0.48141  | 3.04986  | -0.16972 |
| C | -1.88194 | 2.35864  | -0.31459 |
| C | 4.10692  | -1.39711 | -0.01883 |
| C | -2.53272 | -3.34783 | -0.36634 |
| C | 3.46050  | -2.58965 | -0.13292 |
| C | -1.33799 | -3.99971 | -0.36270 |
| C | 2.69501  | 3.40652  | 0.01420  |
| C | -3.94273 | 1.45992  | -0.42362 |
| C | 1.50509  | 4.06221  | -0.08013 |
| C | -3.29131 | 2.65532  | -0.39322 |

|   |          |          |          |
|---|----------|----------|----------|
| H | 5.16942  | -1.20918 | 0.06711  |
| H | -3.53015 | -3.76661 | -0.40403 |
| H | 3.88046  | -3.58694 | -0.15715 |
| H | -1.15077 | -5.06535 | -0.39330 |
| H | 3.69105  | 3.82105  | 0.10156  |
| H | -5.00709 | 1.27095  | -0.47893 |
| H | 1.31840  | 5.12838  | -0.08481 |
| H | -3.70891 | 3.65362  | -0.41826 |
| C | 3.35230  | 0.98928  | 0.03428  |
| C | -3.19645 | -0.93226 | -0.36663 |
| C | -0.88043 | 3.31703  | -0.25739 |
| C | 1.05028  | -3.25469 | -0.29918 |
| H | 4.39020  | 1.29469  | 0.12266  |
| H | -4.23681 | -1.23695 | -0.42285 |
| H | -1.18436 | 4.35891  | -0.27799 |
| H | 1.35913  | -4.29421 | -0.34440 |
| O | 0.17116  | 0.07540  | -2.00313 |
| S | -0.02502 | -0.38302 | 2.20488  |
| C | -1.70981 | -0.05937 | 2.80592  |
| H | -2.40803 | -0.75244 | 2.32096  |
| H | -1.74294 | -0.24022 | 3.88442  |
| H | -2.02379 | 0.96350  | 2.58401  |

Fe-OH singlet

|    |          |          |          |
|----|----------|----------|----------|
| Fe | 0.08220  | 0.09047  | -0.18783 |
| N  | 1.69434  | -1.18403 | -0.14281 |
| N  | -1.18637 | -1.56929 | -0.22614 |
| N  | 1.29320  | 1.61827  | -0.15735 |
| N  | -1.51773 | 1.26841  | -0.24891 |
| C  | 3.01509  | -0.83888 | -0.07113 |
| C  | -2.54439 | -1.56364 | -0.32414 |
| C  | 1.65885  | -2.55974 | -0.16170 |
| C  | -0.80019 | -2.88697 | -0.26237 |
| C  | 2.67497  | 1.60718  | -0.08825 |
| C  | -2.84407 | 0.89495  | -0.33108 |
| C  | 0.93029  | 2.94952  | -0.16112 |
| C  | -1.51515 | 2.63881  | -0.24909 |
| C  | 3.84524  | -2.01812 | -0.04507 |
| C  | -3.05080 | -2.91798 | -0.40198 |
| C  | 3.00145  | -3.08735 | -0.10525 |
| C  | -1.96602 | -3.73904 | -0.36475 |

|   |          |          |          |
|---|----------|----------|----------|
| C | 3.18042  | 2.95809  | -0.05715 |
| C | -3.68784 | 2.06713  | -0.37232 |
| C | 2.10337  | 3.78721  | -0.10288 |
| C | -2.86461 | 3.14894  | -0.31940 |
| H | 4.92647  | -2.01293 | 0.00754  |
| H | -4.09739 | -3.18328 | -0.48181 |
| H | 3.24874  | -4.14137 | -0.11120 |
| H | -1.93628 | -4.82046 | -0.40736 |
| H | 4.23025  | 3.21715  | -0.00576 |
| H | -4.76825 | 2.04309  | -0.43658 |
| H | 2.08314  | 4.86948  | -0.09705 |
| H | -3.12597 | 4.19936  | -0.33163 |
| C | 3.47564  | 0.47682  | -0.04400 |
| C | -3.32364 | -0.40661 | -0.36400 |
| C | -0.37061 | 3.42773  | -0.20463 |
| C | 0.51084  | -3.34492 | -0.22919 |
| H | 4.54881  | 0.63102  | 0.01320  |
| H | -4.39948 | -0.53381 | -0.43911 |
| H | -0.50499 | 4.50497  | -0.20612 |
| H | 0.65628  | -4.42069 | -0.25820 |
| O | 0.04073  | -0.17854 | -1.98296 |
| S | 0.04747  | -0.31543 | 2.00192  |
| C | -1.61760 | -0.03736 | 2.69043  |
| H | -2.33839 | -0.74204 | 2.26446  |
| H | -1.55627 | -0.20980 | 3.76920  |
| H | -1.95975 | 0.98184  | 2.49588  |
| H | 0.91902  | -0.52784 | -2.21809 |

Fe-OH triplet

|    |          |          |          |
|----|----------|----------|----------|
| Fe | 0.06062  | -0.00524 | -0.22430 |
| N  | 1.13312  | 1.70983  | -0.21601 |
| N  | 1.77354  | -1.06433 | -0.09795 |
| N  | -1.63976 | 1.06642  | -0.23386 |
| N  | -1.00154 | -1.70614 | -0.27277 |
| C  | 0.63856  | 2.99271  | -0.14334 |
| C  | 1.88422  | -2.43255 | -0.03868 |
| C  | 2.50479  | 1.82463  | -0.20309 |
| C  | 3.05450  | -0.57202 | -0.12017 |
| C  | -1.75692 | 2.43557  | -0.18192 |
| C  | -0.50857 | -2.98630 | -0.19471 |
| C  | -2.91624 | 0.57470  | -0.38172 |
| C  | -2.36344 | -1.82216 | -0.41002 |
| C  | 1.72609  | 3.93740  | -0.11081 |
| C  | 3.27520  | -2.81106 | -0.00126 |
| C  | 2.88024  | 3.21528  | -0.15564 |
| C  | 3.99995  | -1.65964 | -0.05901 |
| C  | -3.14485 | 2.81331  | -0.27018 |
| C  | -1.59015 | -3.93465 | -0.28948 |
| C  | -3.86130 | 1.66193  | -0.40302 |
| C  | -2.73778 | -3.21436 | -0.43060 |
| H  | 1.60284  | 5.01162  | -0.06026 |
| H  | 3.63109  | -3.83212 | 0.04791  |
| H  | 3.90174  | 3.57330  | -0.14519 |
| H  | 5.07544  | -1.53715 | -0.06216 |
| H  | -3.50427 | 3.83410  | -0.24776 |
| H  | -1.46706 | -5.00956 | -0.25617 |
| H  | -4.93184 | 1.54087  | -0.50817 |
| H  | -3.75346 | -3.57437 | -0.53313 |

|   |          |          |          |
|---|----------|----------|----------|
| C | -0.70417 | 3.33884  | -0.11616 |
| C | 0.82918  | -3.33313 | -0.06664 |
| C | -3.26176 | -0.76558 | -0.47710 |
| C | 3.40564  | 0.76992  | -0.18094 |
| H | -0.95061 | 4.39457  | -0.07108 |
| H | 1.07060  | -4.38983 | -0.01705 |
| H | -4.31393 | -1.00658 | -0.58770 |
| H | 4.46310  | 1.01294  | -0.18012 |
| O | 0.11469  | -0.04052 | -2.05676 |
| S | 0.10849  | -0.05702 | 2.08643  |
| C | -1.60223 | 0.02603  | 2.72788  |
| H | -2.20352 | -0.80290 | 2.34644  |
| H | -1.53235 | -0.05932 | 3.81709  |
| H | -2.08202 | 0.97381  | 2.47452  |
| H | 0.40153  | 0.84961  | -2.33055 |

Fe-OH reduced, doublet

|    |          |          |          |
|----|----------|----------|----------|
| Fe | 0.06553  | -0.00047 | -0.20232 |
| N  | 1.54887  | -1.38720 | -0.14283 |
| N  | -1.34669 | -1.45351 | -0.26957 |
| N  | 1.48616  | 1.45040  | -0.14329 |
| N  | -1.40909 | 1.38614  | -0.27739 |
| C  | 2.90071  | -1.17387 | -0.08337 |
| C  | -2.70434 | -1.29948 | -0.35522 |
| C  | 1.37129  | -2.74609 | -0.16052 |
| C  | -1.10877 | -2.80123 | -0.27242 |
| C  | 2.84589  | 1.29781  | -0.08073 |
| C  | -2.75844 | 1.17142  | -0.36517 |
| C  | 1.24786  | 2.79949  | -0.16396 |
| C  | -1.23151 | 2.74275  | -0.28836 |
| C  | 3.60402  | -2.43844 | -0.06373 |
| C  | -3.35110 | -2.59425 | -0.40273 |
| C  | 2.65477  | -3.41410 | -0.11138 |
| C  | -2.35995 | -3.52678 | -0.35086 |
| C  | 3.49195  | 2.59280  | -0.05897 |
| C  | -3.46188 | 2.43584  | -0.42219 |
| C  | 2.49997  | 3.52467  | -0.11023 |
| C  | -2.51342 | 3.41185  | -0.37416 |
| H  | 4.68111  | -2.54572 | -0.02020 |
| H  | -4.42139 | -2.74833 | -0.46962 |
| H  | 2.79146  | -4.48879 | -0.11587 |
| H  | -2.44754 | -4.60649 | -0.36627 |
| H  | 4.56313  | 2.74796  | -0.01223 |
| H  | -4.53773 | 2.54201  | -0.49204 |
| H  | 2.58817  | 4.60442  | -0.11453 |
| H  | -2.64872 | 4.48652  | -0.39583 |
| C  | 3.51419  | 0.07636  | -0.05059 |
| C  | -3.37165 | -0.07808 | -0.40035 |
| C  | -0.00547 | 3.40178  | -0.23118 |
| C  | 0.14597  | -3.40428 | -0.21998 |
| H  | 4.59926  | 0.10036  | -0.00315 |
| H  | -4.45560 | -0.10211 | -0.47056 |
| H  | -0.02938 | 4.48811  | -0.24454 |
| H  | 0.17084  | -4.49063 | -0.22873 |
| O  | 0.14208  | 0.00598  | -2.07383 |
| S  | 0.05786  | -0.00883 | 2.17383  |
| C  | -1.67274 | 0.02952  | 2.78663  |
| H  | -2.24187 | -0.83382 | 2.42778  |

|   |          |          |          |
|---|----------|----------|----------|
| H | -1.66053 | 0.00562  | 3.88225  |
| H | -2.19090 | 0.93891  | 2.46612  |
| H | 1.09461  | -0.00937 | -2.26467 |

BnMe<sub>2</sub>SiH - TS1 doublet

|    |          |          |          |
|----|----------|----------|----------|
| Fe | 1.52402  | 0.06213  | -0.02247 |
| N  | 2.33779  | 0.61078  | -1.79804 |
| N  | 1.72681  | -1.88135 | -0.53804 |
| N  | 1.51793  | 2.00000  | 0.56090  |
| N  | 0.87322  | -0.48509 | 1.78375  |
| C  | 2.56437  | 1.88988  | -2.24046 |
| C  | 1.36076  | -2.97565 | 0.20454  |
| C  | 2.68696  | -0.21817 | -2.83354 |
| C  | 2.16823  | -2.37108 | -1.74471 |
| C  | 1.87173  | 3.08806  | -0.19479 |
| C  | 0.62802  | -1.76657 | 2.22589  |
| C  | 1.12137  | 2.49532  | 1.77548  |
| C  | 0.56622  | 0.34271  | 2.84291  |
| C  | 3.07179  | 1.86686  | -3.59296 |
| C  | 1.58892  | -4.18809 | -0.54494 |
| C  | 3.14742  | 0.55927  | -3.96086 |
| C  | 2.08956  | -3.81239 | -1.75371 |
| C  | 1.68972  | 4.30352  | 0.56333  |
| C  | 0.14190  | -1.74227 | 3.58259  |
| C  | 1.22562  | 3.93510  | 1.78897  |
| C  | 0.10622  | -0.43507 | 3.96590  |
| H  | 3.33219  | 2.74719  | -4.16652 |
| H  | 1.38550  | -5.18575 | -0.17725 |
| H  | 3.48255  | 0.13930  | -4.90056 |
| H  | 2.38307  | -4.43749 | -2.58735 |
| H  | 1.89984  | 5.29778  | 0.19022  |
| H  | -0.12276 | -2.62154 | 4.15597  |
| H  | 0.97323  | 4.56280  | 2.63404  |
| H  | -0.19503 | -0.01873 | 4.91865  |
| C  | 2.35389  | 3.04409  | -1.49806 |
| C  | 0.84328  | -2.92701 | 1.49301  |
| C  | 0.67984  | 1.72662  | 2.84508  |
| C  | 2.61383  | -1.60508 | -2.81273 |
| H  | 2.58996  | 3.99131  | -1.97290 |
| H  | 0.59964  | -3.87088 | 1.97069  |
| H  | 0.40104  | 2.24817  | 3.75541  |
| H  | 2.92789  | -2.13398 | -3.70715 |
| O  | 0.01476  | 0.18416  | -0.78700 |
| S  | 3.89249  | -0.07901 | 0.63988  |
| C  | 4.03579  | -1.24874 | 2.03732  |
| H  | 3.69460  | -2.24904 | 1.75444  |
| H  | 5.09837  | -1.31145 | 2.29696  |
| H  | 3.47512  | -0.91034 | 2.91242  |
| H  | -1.19986 | 0.03306  | -0.12444 |
| C  | -3.70568 | 0.25939  | -1.33184 |
| Si | -2.75479 | -0.07713 | 0.29630  |
| H  | -3.40000 | 1.24808  | -1.69523 |
| H  | -3.36196 | -0.47233 | -2.07305 |
| C  | -5.20420 | 0.18846  | -1.16273 |
| C  | -5.94823 | 1.32702  | -0.80845 |
| C  | -5.89511 | -1.02441 | -1.32756 |
| C  | -7.33081 | 1.25747  | -0.62830 |
| H  | -5.43709 | 2.27903  | -0.68341 |

|   |          |          |          |
|---|----------|----------|----------|
| C | -7.27760 | -1.09680 | -1.14809 |
| H | -5.34225 | -1.91775 | -1.60962 |
| C | -8.00308 | 0.04422  | -0.79609 |
| H | -7.88392 | 2.15450  | -0.36139 |
| H | -7.78895 | -2.04580 | -1.28869 |
| H | -9.07960 | -0.01041 | -0.65893 |
| C | -3.11558 | 1.24175  | 1.60175  |
| H | -2.86392 | 2.24247  | 1.23283  |
| H | -4.17768 | 1.23792  | 1.87702  |
| H | -2.52780 | 1.05864  | 2.50799  |
| C | -3.08381 | -1.82029 | 0.94926  |
| H | -2.79326 | -2.57958 | 0.21442  |
| H | -2.51397 | -2.00267 | 1.86701  |
| H | -4.14884 | -1.95636 | 1.17512  |

BnMe<sub>2</sub>SiH - TS1 quartet

|    |          |          |          |
|----|----------|----------|----------|
| Fe | -1.56152 | 0.09374  | -0.04040 |
| N  | -1.40173 | 1.92471  | 0.80584  |
| N  | -0.84408 | -0.73443 | 1.69355  |
| N  | -2.33722 | 0.90541  | -1.69211 |
| N  | -1.90657 | -1.74513 | -0.76770 |
| C  | -1.69039 | 3.12364  | 0.20706  |
| C  | -0.66964 | -2.06887 | 1.95091  |
| C  | -0.89808 | 2.22904  | 2.04941  |
| C  | -0.42679 | -0.06854 | 2.82112  |
| C  | -2.49816 | 2.24416  | -1.95474 |
| C  | -1.56092 | -2.94261 | -0.18494 |
| C  | -2.80442 | 0.24312  | -2.80075 |
| C  | -2.42353 | -2.05749 | -2.00054 |
| C  | -1.37680 | 4.21411  | 1.09790  |
| C  | -0.12017 | -2.25473 | 3.27457  |
| C  | -0.88526 | 3.65874  | 2.24057  |
| C  | 0.03028  | -1.01280 | 3.81409  |
| C  | -3.06430 | 2.42971  | -3.27174 |
| C  | -1.88809 | -4.03560 | -1.06771 |
| C  | -3.25580 | 1.18948  | -3.79540 |
| C  | -2.42624 | -3.48704 | -2.19247 |
| H  | -1.51770 | 5.26117  | 0.86175  |
| H  | 0.10709  | -3.21589 | 3.71800  |
| H  | -0.53843 | 4.15546  | 3.13772  |
| H  | 0.40740  | -0.74307 | 4.79238  |
| H  | -3.28578 | 3.39245  | -3.71440 |
| H  | -1.71903 | -5.08050 | -0.84035 |
| H  | -3.66671 | 0.91807  | -4.75941 |
| H  | -2.78891 | -3.98737 | -3.08128 |
| C  | -2.20087 | 3.27802  | -1.07813 |
| C  | -0.99206 | -3.10003 | 1.07313  |
| C  | -2.85520 | -1.13575 | -2.94801 |
| C  | -0.44505 | 1.31022  | 2.98833  |
| H  | -2.38513 | 4.29118  | -1.42161 |
| H  | -0.78885 | -4.11480 | 1.40135  |
| H  | -3.24824 | -1.52590 | -3.88165 |
| H  | -0.07785 | 1.70363  | 3.93119  |
| O  | 0.02498  | 0.16532  | -0.73851 |
| S  | -3.64571 | 0.09601  | 1.17467  |
| C  | -4.25133 | -1.60824 | 1.39729  |
| H  | -3.53598 | -2.18734 | 1.99065  |

|    |          |          |          |
|----|----------|----------|----------|
| H  | -5.19571 | -1.55852 | 1.94796  |
| H  | -4.40465 | -2.10809 | 0.43818  |
| H  | 1.14271  | -0.02600 | -0.05135 |
| C  | 3.64469  | 0.24232  | -1.30272 |
| Si | 2.75010  | -0.17128 | 0.34228  |
| H  | 3.27676  | -0.45849 | -2.06223 |
| H  | 3.31796  | 1.24310  | -1.61123 |
| C  | 5.14912  | 0.17888  | -1.20064 |
| C  | 5.84336  | -1.01764 | -1.44946 |
| C  | 5.89883  | 1.30780  | -0.82767 |
| C  | 7.23286  | -1.08404 | -1.33119 |
| H  | 5.28659  | -1.90281 | -1.74913 |
| C  | 7.28834  | 1.24459  | -0.70854 |
| H  | 5.38559  | 2.24816  | -0.63896 |
| C  | 7.96336  | 0.04711  | -0.95850 |
| H  | 7.74558  | -2.02063 | -1.53596 |
| H  | 7.84454  | 2.13463  | -0.42485 |
| H  | 9.04518  | -0.00259 | -0.86907 |
| C  | 3.11315  | -1.94583 | 0.89270  |
| H  | 2.79297  | -2.66857 | 0.13356  |
| H  | 4.18723  | -2.08960 | 1.06576  |
| H  | 2.58313  | -2.17698 | 1.82334  |
| C  | 3.20229  | 1.07431  | 1.69450  |
| H  | 2.92506  | 2.09376  | 1.40318  |
| H  | 2.68104  | 0.83787  | 2.62840  |
| H  | 4.28160  | 1.05947  | 1.89214  |

BnMe<sub>2</sub>SiH - INT1 doublet

|    |          |          |          |
|----|----------|----------|----------|
| Fe | -1.73483 | 0.07941  | 0.00925  |
| N  | -1.60479 | 2.04451  | 0.45880  |
| N  | -0.79688 | -0.37946 | 1.73089  |
| N  | -2.65954 | 0.54207  | -1.72154 |
| N  | -1.98025 | -1.87744 | -0.37679 |
| C  | -1.97645 | 3.09640  | -0.34007 |
| C  | -0.47076 | -1.63695 | 2.18402  |
| C  | -1.07567 | 2.59250  | 1.60221  |
| C  | -0.38560 | 0.50229  | 2.70506  |
| C  | -2.88561 | 1.79974  | -2.22325 |
| C  | -1.47157 | -2.93073 | 0.34652  |
| C  | -3.19518 | -0.33766 | -2.62865 |
| C  | -2.59955 | -2.42655 | -1.47375 |
| C  | -1.68357 | 4.34363  | 0.32243  |
| C  | 0.18074  | -1.54296 | 3.46556  |
| C  | -1.13204 | 4.03160  | 1.52806  |
| C  | 0.22625  | -0.21930 | 3.79131  |
| C  | -3.56745 | 1.70879  | -3.49233 |
| C  | -1.79931 | -4.17596 | -0.30110 |
| C  | -3.76558 | 0.38527  | -3.74007 |
| C  | -2.50463 | -3.86434 | -1.42402 |
| H  | -1.88237 | 5.32141  | -0.09729 |
| H  | 0.53775  | -2.39126 | 4.03561  |
| H  | -0.77995 | 4.69983  | 2.30349  |
| H  | 0.63142  | 0.24279  | 4.68249  |
| H  | -3.85608 | 2.56051  | -4.09488 |
| H  | -1.51617 | -5.15258 | 0.07029  |
| H  | -4.24751 | -0.07905 | -4.59091 |
| H  | -2.91755 | -4.53149 | -2.16981 |
| C  | -2.55985 | 2.99325  | -1.59601 |

|    |          |          |          |
|----|----------|----------|----------|
| C  | -0.76150 | -2.82977 | 1.53407  |
| C  | -3.18678 | -1.71993 | -2.51475 |
| C  | -0.52007 | 1.88314  | 2.65756  |
| H  | -2.80269 | 3.91554  | -2.11354 |
| H  | -0.43311 | -3.75116 | 2.00372  |
| H  | -3.64412 | -2.29338 | -3.31439 |
| H  | -0.14143 | 2.45221  | 3.50034  |
| O  | -0.15214 | 0.12599  | -0.88704 |
| S  | -3.77194 | 0.19453  | 1.12662  |
| C  | -4.16277 | -1.44266 | 1.84326  |
| H  | -3.37967 | -1.76676 | 2.53345  |
| H  | -5.09794 | -1.32642 | 2.40067  |
| H  | -4.30233 | -2.19948 | 1.06820  |
| H  | 0.59337  | 0.12895  | -0.24277 |
| C  | 3.99923  | 0.52099  | -1.24893 |
| Si | 3.14465  | -0.15547 | 0.33364  |
| H  | 3.55173  | 0.01804  | -2.11400 |
| H  | 3.75566  | 1.58646  | -1.33501 |
| C  | 5.49486  | 0.31218  | -1.21889 |
| C  | 6.07195  | -0.86523 | -1.72561 |
| C  | 6.35002  | 1.27545  | -0.65601 |
| C  | 7.45151  | -1.07171 | -1.67356 |
| H  | 5.43155  | -1.62129 | -2.17441 |
| C  | 7.72988  | 1.07110  | -0.60287 |
| H  | 5.92784  | 2.19886  | -0.26567 |
| C  | 8.28835  | -0.10492 | -1.11021 |
| H  | 7.87336  | -1.98792 | -2.07914 |
| H  | 8.37001  | 1.83517  | -0.16887 |
| H  | 9.36259  | -0.26373 | -1.07168 |
| C  | 3.72179  | 0.76303  | 1.89010  |
| H  | 4.79695  | 0.61245  | 2.05682  |
| H  | 3.53957  | 1.84025  | 1.80791  |
| H  | 3.18481  | 0.39448  | 2.77100  |
| C  | 3.37558  | -2.02958 | 0.51107  |
| H  | 2.83549  | -2.39893 | 1.38977  |
| H  | 2.99328  | -2.56040 | -0.36767 |
| H  | 4.43712  | -2.28572 | 0.62892  |

BnMe<sub>2</sub>SiH - INT1 quartet

|    |          |          |          |
|----|----------|----------|----------|
| Fe | -1.78178 | 0.06910  | 0.00167  |
| N  | -1.63279 | 2.02666  | 0.47629  |
| N  | -0.82931 | -0.41675 | 1.72087  |
| N  | -2.69826 | 0.55533  | -1.71748 |
| N  | -2.03775 | -1.88078 | -0.40370 |
| C  | -1.99975 | 3.09078  | -0.30753 |
| C  | -0.50789 | -1.68019 | 2.15488  |
| C  | -1.09097 | 2.55684  | 1.62347  |
| C  | -0.40181 | 0.45082  | 2.69870  |
| C  | -2.91863 | 1.82148  | -2.20393 |
| C  | -1.53057 | -2.94459 | 0.30703  |
| C  | -3.24482 | -0.31027 | -2.63327 |
| C  | -2.66408 | -2.41547 | -1.50315 |
| C  | -1.69438 | 4.32759  | 0.36818  |
| C  | 0.15950  | -1.60623 | 3.43025  |
| C  | -1.13763 | 3.99689  | 1.56651  |
| C  | 0.21922  | -0.28671 | 3.76982  |
| C  | -3.60458 | 1.74914  | -3.47150 |
| C  | -1.86839 | -4.18093 | -0.35224 |

|    |          |          |          |
|----|----------|----------|----------|
| C  | -3.81298 | 0.43002  | -3.73382 |
| C  | -2.57719 | -3.85402 | -1.46866 |
| H  | -1.88762 | 5.31183  | -0.03876 |
| H  | 0.51648  | -2.46359 | 3.98656  |
| H  | -0.77520 | 4.65310  | 2.34744  |
| H  | 0.63894  | 0.16256  | 4.66082  |
| H  | -3.88932 | 2.60962  | -4.06333 |
| H  | -1.58840 | -5.16289 | 0.00727  |
| H  | -4.30125 | -0.02074 | -4.58829 |
| H  | -2.99662 | -4.51112 | -2.21969 |
| C  | -2.58652 | 3.00561  | -1.56366 |
| C  | -0.81329 | -2.86245 | 1.49144  |
| C  | -3.24923 | -1.69330 | -2.53489 |
| C  | -0.52944 | 1.83321  | 2.66582  |
| H  | -2.82588 | 3.93504  | -2.06990 |
| H  | -0.48730 | -3.79211 | 1.94629  |
| H  | -3.71403 | -2.25392 | -3.33926 |
| H  | -0.13921 | 2.39224  | 3.51003  |
| O  | -0.18179 | 0.10758  | -0.87566 |
| S  | -3.78532 | 0.18491  | 1.15880  |
| C  | -4.20284 | -1.46530 | 1.82850  |
| H  | -3.42047 | -1.82337 | 2.50252  |
| H  | -5.13175 | -1.34936 | 2.39608  |
| H  | -4.35998 | -2.19521 | 1.03137  |
| H  | 0.54656  | 0.13538  | -0.21949 |
| C  | 4.09903  | 0.38221  | -1.33976 |
| Si | 3.23268  | -0.00976 | 0.33124  |
| H  | 3.66068  | -0.26795 | -2.10583 |
| H  | 3.85041  | 1.41422  | -1.61393 |
| C  | 5.59531  | 0.19160  | -1.26534 |
| C  | 6.18231  | -1.05215 | -1.55635 |
| C  | 6.44179  | 1.24343  | -0.87385 |
| C  | 7.56251  | -1.23777 | -1.46107 |
| H  | 5.54901  | -1.87880 | -1.87065 |
| C  | 7.82234  | 1.06018  | -0.77783 |
| H  | 6.01224  | 2.21806  | -0.65275 |
| C  | 8.39050  | -0.18255 | -1.06954 |
| H  | 7.99190  | -2.20789 | -1.69870 |
| H  | 8.45545  | 1.89218  | -0.47966 |
| H  | 9.46528  | -0.32543 | -0.99769 |
| C  | 3.79329  | 1.17829  | 1.70197  |
| H  | 4.87171  | 1.08202  | 1.88715  |
| H  | 3.58763  | 2.22078  | 1.43483  |
| H  | 3.26675  | 0.95836  | 2.63730  |
| C  | 3.49299  | -1.81846 | 0.84405  |
| H  | 2.95724  | -2.03122 | 1.77575  |
| H  | 3.12049  | -2.50542 | 0.07616  |
| H  | 4.55819  | -2.03288 | 1.00470  |

PhMe<sub>2</sub>SiH - TS1 doublet

|    |         |          |          |
|----|---------|----------|----------|
| Fe | 1.12562 | 0.16235  | 0.08281  |
| N  | 1.44812 | 2.11918  | -0.34235 |
| N  | 1.49871 | -0.31296 | -1.84555 |
| N  | 0.96176 | 0.62867  | 2.04493  |
| N  | 0.97795 | -1.77959 | 0.52920  |
| C  | 1.37607 | 3.17535  | 0.53106  |
| C  | 1.46669 | -1.56310 | -2.41086 |
| C  | 1.68427 | 2.66296  | -1.57913 |

|    |          |          |          |
|----|----------|----------|----------|
| C  | 1.73497  | 0.56462  | -2.87770 |
| C  | 0.97059  | 1.88363  | 2.59657  |
| C  | 1.02502  | -2.84099 | -0.34764 |
| C  | 0.76733  | -0.24126 | 3.08584  |
| C  | 0.79202  | -2.33236 | 1.77802  |
| C  | 1.57559  | 4.42015  | -0.17459 |
| C  | 1.70134  | -1.47579 | -3.83243 |
| C  | 1.76700  | 4.10222  | -1.48337 |
| C  | 1.86771  | -0.15598 | -4.12113 |
| C  | 0.77395  | 1.80323  | 4.02495  |
| C  | 0.85068  | -4.08338 | 0.36212  |
| C  | 0.65022  | 0.48225  | 4.32959  |
| C  | 0.71039  | -3.76829 | 1.68045  |
| H  | 1.56836  | 5.39779  | 0.29005  |
| H  | 1.73047  | -2.32396 | -4.50448 |
| H  | 1.94966  | 4.76384  | -2.32040 |
| H  | 2.06163  | 0.30666  | -5.08038 |
| H  | 0.74273  | 2.65661  | 4.69020  |
| H  | 0.84932  | -5.06129 | -0.10222 |
| H  | 0.49499  | 0.02216  | 5.29709  |
| H  | 0.56944  | -4.43373 | 2.52260  |
| C  | 1.15816  | 3.07112  | 1.89808  |
| C  | 1.24120  | -2.74558 | -1.71690 |
| C  | 0.69246  | -1.62337 | 2.96789  |
| C  | 1.82225  | 1.94468  | -2.75995 |
| H  | 1.13713  | 3.99322  | 2.47062  |
| H  | 1.24904  | -3.66982 | -2.28633 |
| H  | 0.54312  | -2.19603 | 3.87798  |
| H  | 2.00882  | 2.51002  | -3.66773 |
| O  | -0.51262 | 0.46764  | -0.22206 |
| S  | 3.58398  | 0.16398  | 0.34194  |
| C  | 4.20115  | -1.52931 | 0.03805  |
| H  | 3.95147  | -1.86698 | -0.97222 |
| H  | 5.29276  | -1.49513 | 0.12601  |
| H  | 3.80778  | -2.24441 | 0.76505  |
| H  | -1.54903 | -0.45909 | -0.09827 |
| C  | -4.32118 | -0.02806 | -0.31624 |
| C  | -5.01376 | 0.48414  | 0.79898  |
| C  | -4.68941 | 0.45141  | -1.58956 |
| C  | -6.03398 | 1.42563  | 0.65048  |
| H  | -4.75805 | 0.14273  | 1.79920  |
| C  | -5.70796 | 1.39295  | -1.74391 |
| H  | -4.17594 | 0.08563  | -2.47573 |
| C  | -6.38367 | 1.88219  | -0.62271 |
| H  | -6.55572 | 1.80213  | 1.52667  |
| H  | -5.97488 | 1.74476  | -2.73719 |
| H  | -7.17702 | 2.61568  | -0.74078 |
| Si | -2.93569 | -1.28748 | -0.11190 |
| C  | -3.08366 | -2.21741 | 1.52755  |
| H  | -2.27650 | -2.95269 | 1.61724  |
| H  | -3.01511 | -1.54261 | 2.38768  |
| H  | -4.04065 | -2.75127 | 1.58830  |
| C  | -2.85374 | -2.47675 | -1.57974 |
| H  | -2.74746 | -1.94363 | -2.53065 |
| H  | -1.99160 | -3.14494 | -1.47560 |
| H  | -3.76007 | -3.09324 | -1.63380 |

PhMe<sub>2</sub>SiH - TS1 quartet

|    |          |         |         |
|----|----------|---------|---------|
| Fe | -1.18305 | 0.11965 | 0.14974 |
|----|----------|---------|---------|



|    |          |          |          |
|----|----------|----------|----------|
| N  | -2.60421 | 0.99147  | -0.95096 |
| N  | -0.31707 | 1.90878  | 0.47697  |
| N  | -2.15278 | -1.64361 | 0.02971  |
| N  | 0.22265  | -0.76015 | 1.35649  |
| C  | -3.69024 | 0.38384  | -1.53141 |
| C  | 0.84635  | 2.15358  | 1.16711  |
| C  | -2.68848 | 2.32020  | -1.28932 |
| C  | -0.70032 | 3.11164  | -0.06045 |
| C  | -3.29830 | -1.89966 | -0.68098 |
| C  | 1.29351  | -0.14742 | 1.95506  |
| C  | -1.75147 | -2.85074 | 0.55558  |
| C  | 0.29137  | -2.08444 | 1.71254  |
| C  | -4.46824 | 1.35120  | -2.27166 |
| C  | 1.19077  | 3.55141  | 1.07920  |
| C  | -3.84710 | 2.55157  | -2.12165 |
| C  | 0.22956  | 4.14685  | 0.31907  |
| C  | -3.63986 | -3.29783 | -0.58887 |
| C  | 2.06428  | -1.11142 | 2.70633  |
| C  | -2.67925 | -3.88756 | 0.17596  |
| C  | 1.44215  | -2.31365 | 2.55551  |
| H  | -5.37211 | 1.12106  | -2.82115 |
| H  | 2.06098  | 3.99984  | 1.54126  |
| H  | -4.13257 | 3.51605  | -2.52186 |
| H  | 0.14598  | 5.18581  | 0.02671  |
| H  | -4.50267 | -3.75215 | -1.05897 |
| H  | 2.95906  | -0.87901 | 3.26934  |
| H  | -2.58999 | -4.92693 | 0.46524  |
| H  | 1.71671  | -3.27379 | 2.97376  |
| C  | -4.02075 | -0.95845 | -1.40653 |
| C  | 1.59262  | 1.20773  | 1.86122  |
| C  | -0.61871 | -3.06220 | 1.33154  |
| C  | -1.80945 | 3.31101  | -0.87617 |
| H  | -4.91361 | -1.30279 | -1.91905 |
| H  | 2.48696  | 1.55624  | 2.36810  |
| H  | -0.43704 | -4.07493 | 1.67793  |
| H  | -1.99714 | 4.32221  | -1.22368 |
| O  | -0.23877 | -0.16979 | -1.27219 |
| S  | -2.42056 | 0.27565  | 2.22621  |
| C  | -1.67901 | 1.52538  | 3.32547  |
| H  | -1.65617 | 2.51155  | 2.85633  |
| H  | -2.27671 | 1.56162  | 4.24157  |
| H  | -0.65767 | 1.23333  | 3.59189  |
| H  | 0.95815  | -0.75524 | -1.26583 |
| C  | 3.81530  | -0.33335 | -1.12993 |
| C  | 4.01324  | 0.98313  | -1.59422 |
| C  | 4.70399  | -0.81827 | -0.15055 |
| C  | 5.05495  | 1.77595  | -1.11015 |
| H  | 3.34494  | 1.39779  | -2.34584 |
| C  | 5.75011  | -0.03053 | 0.33609  |
| H  | 4.58417  | -1.82696 | 0.23683  |
| C  | 5.92803  | 1.26950  | -0.14299 |
| H  | 5.18717  | 2.78688  | -1.48748 |
| H  | 6.42708  | -0.43189 | 1.08631  |
| H  | 6.74170  | 1.88407  | 0.23364  |
| Si | 2.39804  | -1.38584 | -1.79723 |
| C  | 2.55543  | -3.18944 | -1.24667 |
| H  | 2.54840  | -3.28537 | -0.15591 |
| H  | 1.71393  | -3.77301 | -1.63736 |
| H  | 3.48208  | -3.63903 | -1.62626 |
| C  | 2.30539  | -1.26684 | -3.68509 |
| H  | 1.44134  | -1.82757 | -4.05968 |

|   |         |          |          |
|---|---------|----------|----------|
| H | 2.19859 | -0.22933 | -4.02018 |
| H | 3.20896 | -1.68234 | -4.14930 |

PhMe<sub>2</sub>SiH - INT1 doublet

|    |          |          |          |
|----|----------|----------|----------|
| Fe | 1.32245  | 0.15676  | 0.15281  |
| N  | 1.97639  | 1.83488  | -0.75089 |
| N  | 2.06045  | -0.94743 | -1.35481 |
| N  | 0.68410  | 1.25581  | 1.72260  |
| N  | 0.66897  | -1.51678 | 1.05916  |
| C  | 1.80166  | 3.12487  | -0.31502 |
| C  | 1.89428  | -2.29933 | -1.54350 |
| C  | 2.68662  | 1.91519  | -1.92233 |
| C  | 2.75137  | -0.48663 | -2.44956 |
| C  | 0.68628  | 2.62449  | 1.82058  |
| C  | 0.71382  | -2.79701 | 0.55708  |
| C  | 0.12019  | 0.78345  | 2.88280  |
| C  | 0.11593  | -1.61215 | 2.31650  |
| C  | 2.40565  | 4.04584  | -1.24811 |
| C  | 2.51108  | -2.70205 | -2.78268 |
| C  | 2.96179  | 3.29627  | -2.23878 |
| C  | 3.05067  | -1.58162 | -3.33865 |
| C  | 0.11289  | 3.02724  | 3.08135  |
| C  | 0.15993  | -3.71903 | 1.51579  |
| C  | -0.22951 | 1.88698  | 3.74285  |
| C  | -0.20041 | -2.98676 | 2.60856  |
| H  | 2.40153  | 5.12245  | -1.13563 |
| H  | 2.52112  | -3.71624 | -3.16119 |
| H  | 3.50614  | 3.62788  | -3.11369 |
| H  | 3.59112  | -1.48315 | -4.27137 |
| H  | -0.00121 | 4.05490  | 3.40183  |
| H  | 0.07925  | -4.78763 | 1.36267  |
| H  | -0.68824 | 1.78286  | 4.71777  |
| H  | -0.64313 | -3.33014 | 3.53481  |
| C  | 1.18740  | 3.50379  | 0.86973  |
| C  | 1.25738  | -3.16637 | -0.66712 |
| C  | -0.13092 | -0.54981 | 3.17552  |
| C  | 3.06965  | 0.83950  | -2.71002 |
| H  | 1.12349  | 4.56526  | 1.08540  |
| H  | 1.21509  | -4.21602 | -0.93939 |
| H  | -0.58057 | -0.77664 | 4.13671  |
| H  | 3.62501  | 1.05320  | -3.61743 |
| O  | -0.27013 | 0.37209  | -0.70094 |
| S  | 3.33130  | 0.03346  | 1.31546  |
| C  | 4.13750  | -1.56696 | 0.94977  |
| H  | 4.40721  | -1.64963 | -0.10552 |
| H  | 5.04897  | -1.60601 | 1.55505  |
| H  | 3.49342  | -2.40489 | 1.22830  |
| H  | -0.97230 | -0.12722 | -0.22592 |
| C  | -4.62083 | 0.01592  | -0.74999 |
| C  | -5.46205 | 0.55554  | 0.24672  |
| C  | -4.72695 | 0.55168  | -2.05160 |
| C  | -6.37553 | 1.56879  | -0.04500 |
| H  | -5.40752 | 0.17687  | 1.26466  |
| C  | -5.63909 | 1.56495  | -2.34674 |
| H  | -4.09023 | 0.17162  | -2.84682 |
| C  | -6.46779 | 2.07662  | -1.34398 |
| H  | -7.01650 | 1.96206  | 0.74010  |
| H  | -5.70422 | 1.95600  | -3.35893 |

|    |          |          |          |
|----|----------|----------|----------|
| H  | -7.17810 | 2.86680  | -1.57251 |
| Si | -3.36593 | -1.31861 | -0.34767 |
| C  | -2.96254 | -2.41746 | -1.83817 |
| H  | -2.63392 | -1.82882 | -2.70076 |
| H  | -2.15335 | -3.11081 | -1.58391 |
| H  | -3.83778 | -3.00882 | -2.13994 |
| C  | -3.86534 | -2.34742 | 1.16461  |
| H  | -3.06344 | -3.04678 | 1.42448  |
| H  | -4.05698 | -1.72085 | 2.04200  |
| H  | -4.77345 | -2.93002 | 0.95756  |

PhMe<sub>2</sub>SiH - INT1 quartet

|    |          |          |          |
|----|----------|----------|----------|
| Fe | 1.37142  | -0.09276 | 0.16635  |
| N  | 2.86202  | -0.41297 | -1.13924 |
| N  | 0.92021  | -2.05054 | 0.14792  |
| N  | 1.90163  | 1.85202  | 0.29156  |
| N  | -0.15424 | 0.24185  | 1.45358  |
| C  | 3.71198  | 0.52810  | -1.66889 |
| C  | -0.15940 | -2.65385 | 0.75083  |
| C  | 3.25077  | -1.62207 | -1.66320 |
| C  | 1.56527  | -3.03407 | -0.56140 |
| C  | 2.88031  | 2.48456  | -0.43215 |
| C  | -1.07361 | -0.67771 | 1.89886  |
| C  | 1.31035  | 2.81716  | 1.07251  |
| C  | -0.45796 | 1.42877  | 2.07814  |
| C  | 4.64642  | -0.10364 | -2.56861 |
| C  | -0.17730 | -4.05930 | 0.43181  |
| C  | 4.36565  | -1.43551 | -2.55952 |
| C  | 0.89536  | -4.29660 | -0.37376 |
| C  | 2.91949  | 3.88444  | -0.08799 |
| C  | -1.99535 | -0.04812 | 2.81030  |
| C  | 1.95153  | 4.08894  | 0.84828  |
| C  | -1.60916 | 1.25426  | 2.92729  |
| H  | 5.41694  | 0.42140  | -3.11852 |
| H  | -0.92481 | -4.75777 | 0.78565  |
| H  | 4.85429  | -2.23369 | -3.10345 |
| H  | 1.21067  | -5.22969 | -0.82281 |
| H  | 3.60547  | 4.60222  | -0.51929 |
| H  | -2.81993 | -0.55476 | 3.29487  |
| H  | 1.67424  | 5.01046  | 1.34394  |
| H  | -2.05046 | 2.03816  | 3.52957  |
| C  | 3.72070  | 1.87924  | -1.35753 |
| C  | -1.09494 | -2.02483 | 1.55950  |
| C  | 0.22440  | 2.62709  | 1.91507  |
| C  | 2.66502  | -2.84846 | -1.38882 |
| H  | 4.45428  | 2.50526  | -1.85483 |
| H  | -1.89090 | -2.63449 | 1.97419  |
| H  | -0.13418 | 3.48708  | 2.47134  |
| H  | 3.07467  | -3.72344 | -1.88277 |
| O  | 0.25174  | 0.23846  | -1.23825 |
| S  | 2.81868  | -0.35625 | 1.95936  |
| C  | 2.33372  | -1.82844 | 2.93142  |
| H  | 2.42264  | -2.74607 | 2.34582  |
| H  | 3.01701  | -1.88124 | 3.78519  |
| H  | 1.31099  | -1.73094 | 3.30438  |
| H  | -0.60804 | 0.56117  | -0.89446 |
| C  | -4.42741 | 0.29531  | -0.97512 |
| C  | -4.76693 | -0.84569 | -1.73374 |

|    |          |          |          |
|----|----------|----------|----------|
| C  | -5.09867 | 0.48342  | 0.25225  |
| C  | -5.73890 | -1.74578 | -1.29628 |
| H  | -4.26757 | -1.03307 | -2.68147 |
| C  | -6.07206 | -0.41412 | 0.69254  |
| H  | -4.86221 | 1.34548  | 0.87127  |
| C  | -6.39625 | -1.53234 | -0.08109 |
| H  | -5.98551 | -2.61310 | -1.90355 |
| H  | -6.58069 | -0.24047 | 1.63768  |
| H  | -7.15436 | -2.23224 | 0.26047  |
| Si | -3.09127 | 1.48125  | -1.55050 |
| C  | -2.96751 | 1.56632  | -3.43992 |
| H  | -2.13914 | 2.22027  | -3.73349 |
| H  | -2.78413 | 0.58126  | -3.88137 |
| H  | -3.89129 | 1.96960  | -3.87669 |
| C  | -3.27588 | 3.20451  | -0.77953 |
| H  | -3.23181 | 3.16867  | 0.31406  |
| H  | -2.46468 | 3.85583  | -1.12337 |
| H  | -4.22878 | 3.66852  | -1.06840 |

BnMe<sub>2</sub>SiH

|    |         |          |          |
|----|---------|----------|----------|
| C  | 3.99150 | 0.26165  | -1.60145 |
| Si | 2.91394 | 0.99698  | -0.20021 |
| H  | 3.59058 | -0.73270 | -1.83789 |
| H  | 3.83733 | 0.88077  | -2.49492 |
| C  | 5.46241 | 0.17146  | -1.27106 |
| C  | 5.99737 | -0.96953 | -0.64977 |
| C  | 6.33501 | 1.23615  | -1.55185 |
| C  | 7.35198 | -1.04385 | -0.31932 |
| H  | 5.34454 | -1.81173 | -0.43076 |
| C  | 7.69017 | 1.16534  | -1.22285 |
| H  | 5.94756 | 2.12705  | -2.04138 |
| C  | 8.20604 | 0.02458  | -0.60317 |
| H  | 7.74072 | -1.94079 | 0.15643  |
| H  | 8.34430 | 2.00184  | -1.45597 |
| H  | 9.26107 | -0.03313 | -0.34949 |
| H  | 1.50510 | 1.01300  | -0.70820 |
| C  | 3.43421 | 2.77184  | 0.19195  |
| H  | 4.47736 | 2.81316  | 0.52618  |
| H  | 3.33788 | 3.41977  | -0.68737 |
| H  | 2.80953 | 3.19445  | 0.98790  |
| C  | 2.98480 | -0.08792 | 1.34660  |
| H  | 2.35880 | 0.32915  | 2.14444  |
| H  | 2.62750 | -1.10344 | 1.13838  |
| H  | 4.00915 | -0.16479 | 1.72917  |

[BnMe<sub>2</sub>Si]<sup>+</sup>

|    |         |          |          |
|----|---------|----------|----------|
| C  | 3.94576 | 0.53740  | -1.79974 |
| Si | 3.64544 | 0.11535  | -0.02865 |
| H  | 3.52901 | -0.15530 | -2.53128 |
| H  | 3.76049 | 1.57443  | -2.07974 |
| C  | 5.41563 | 0.25531  | -1.47613 |
| C  | 5.95017 | -1.04763 | -1.62764 |
| C  | 6.25852 | 1.28055  | -0.98084 |
| C  | 7.28127 | -1.30560 | -1.31444 |

|   |         |          |          |
|---|---------|----------|----------|
| H | 5.32255 | -1.84215 | -2.02123 |
| C | 7.58881 | 1.01150  | -0.66936 |
| H | 5.87236 | 2.29068  | -0.87597 |
| C | 8.10095 | -0.27864 | -0.83514 |
| H | 7.68193 | -2.30486 | -1.45176 |
| H | 8.22782 | 1.81027  | -0.30679 |
| H | 9.13957 | -0.48353 | -0.59453 |
| C | 3.67374 | 1.42374  | 1.28821  |
| H | 4.41713 | 1.19102  | 2.05801  |
| H | 3.86723 | 2.42080  | 0.88567  |
| H | 2.68966 | 1.43106  | 1.77573  |
| C | 3.31129 | -1.63385 | 0.49427  |
| H | 2.30301 | -1.66887 | 0.92834  |
| H | 3.35423 | -2.33715 | -0.34072 |
| H | 4.01363 | -1.95040 | 1.27270  |

phenyldimethylsilane (1a), PhMe<sub>2</sub>SiH

|    |         |          |          |
|----|---------|----------|----------|
| C  | 5.33768 | -0.10941 | -1.16325 |
| C  | 6.25577 | -0.81757 | -1.96060 |
| C  | 5.85532 | 0.66437  | -0.10575 |
| C  | 7.63050 | -0.75899 | -1.71528 |
| H  | 5.89360 | -1.42485 | -2.78747 |
| C  | 7.22705 | 0.72807  | 0.14555  |
| H  | 5.18055 | 1.22922  | 0.53537  |
| C  | 8.11876 | 0.01470  | -0.66055 |
| H  | 8.31839 | -1.31581 | -2.34667 |
| H  | 7.60104 | 1.33272  | 0.96803  |
| H  | 9.18729 | 0.06272  | -0.46702 |
| Si | 3.48115 | -0.20011 | -1.50003 |
| H  | 3.31477 | -1.05795 | -2.71306 |
| C  | 2.77171 | 1.51737  | -1.85581 |
| H  | 3.26019 | 1.97691  | -2.72260 |
| H  | 1.69674 | 1.45956  | -2.06544 |
| H  | 2.90818 | 2.18963  | -1.00003 |
| C  | 2.56545 | -1.00090 | -0.05079 |
| H  | 1.49033 | -1.06712 | -0.25730 |
| H  | 2.93517 | -2.01471 | 0.14068  |
| H  | 2.69300 | -0.41924 | 0.87020  |

[PhMe<sub>2</sub>Si]<sup>+</sup>

|    |         |          |          |
|----|---------|----------|----------|
| C  | 5.40928 | 0.18899  | -1.10683 |
| C  | 6.32021 | 0.26518  | -2.19159 |
| C  | 5.90982 | -0.10187 | 0.18816  |
| C  | 7.67875 | 0.06001  | -1.98424 |
| H  | 5.96485 | 0.48484  | -3.19357 |
| C  | 7.26965 | -0.30766 | 0.38609  |
| H  | 5.23608 | -0.16537 | 1.03692  |
| C  | 8.15138 | -0.22625 | -0.69806 |
| H  | 8.37037 | 0.12092  | -2.81827 |
| H  | 7.64613 | -0.53017 | 1.37926  |
| H  | 9.21362 | -0.38706 | -0.53973 |
| Si | 3.64121 | 0.46933  | -1.37160 |
| C  | 2.98130 | 0.86984  | -3.05202 |
| H  | 3.68884 | 0.65336  | -3.85590 |
| H  | 2.05239 | 0.31543  | -3.22805 |
| H  | 2.73088 | 1.93906  | -3.08921 |

|   |         |          |          |
|---|---------|----------|----------|
| C | 2.43716 | 0.40117  | 0.03060  |
| H | 1.69879 | -0.38791 | -0.16189 |
| H | 2.90794 | 0.21577  | 0.99838  |
| H | 1.88623 | 1.34929  | 0.07795  |

[BnMe<sub>2</sub>Si]<sub>T</sub>

|    |         |          |          |
|----|---------|----------|----------|
| C  | 4.05800 | 0.49210  | -1.68560 |
| Si | 2.96630 | 0.21950  | -0.12040 |
| H  | 3.68220 | -0.16750 | -2.47680 |
| H  | 3.90430 | 1.52260  | -2.02740 |
| C  | 5.52140 | 0.22960  | -1.42220 |
| C  | 6.06970 | -1.05350 | -1.59250 |
| C  | 6.37190 | 1.25360  | -0.97040 |
| C  | 7.41600 | -1.30430 | -1.32160 |
| H  | 5.43420 | -1.86060 | -1.95030 |
| C  | 7.71850 | 1.00540  | -0.69870 |
| H  | 5.97360 | 2.25740  | -0.83980 |
| C  | 8.24800 | -0.27610 | -0.87130 |
| H  | 7.81630 | -2.30450 | -1.46790 |
| H  | 8.35610 | 1.81680  | -0.35660 |
| H  | 9.29660 | -0.46970 | -0.66250 |
| C  | 3.46030 | 1.41930  | 1.26890  |
| H  | 4.50810 | 1.26800  | 1.56190  |
| H  | 3.34490 | 2.46320  | 0.95640  |
| H  | 2.83550 | 1.26250  | 2.15550  |
| C  | 3.07470 | -1.58160 | 0.47770  |
| H  | 2.45010 | -1.73230 | 1.36550  |
| H  | 2.73580 | -2.28120 | -0.29460 |
| H  | 4.10790 | -1.84450 | 0.74190  |

[PhMe<sub>2</sub>Si]<sub>T</sub>

|    |         |          |          |
|----|---------|----------|----------|
| C  | 5.34640 | -0.06490 | -1.15800 |
| C  | 6.27300 | 0.11140  | -2.20830 |
| C  | 5.86600 | -0.22170 | 0.14520  |
| C  | 7.64700 | 0.14460  | -1.96830 |
| H  | 5.91720 | 0.22980  | -3.22930 |
| C  | 7.23920 | -0.18910 | 0.38950  |
| H  | 5.18860 | -0.36630 | 0.98380  |
| C  | 8.13560 | -0.00520 | -0.66720 |
| H  | 8.33740 | 0.28880  | -2.79560 |
| H  | 7.61110 | -0.30550 | 1.40450  |
| H  | 9.20570 | 0.01990  | -0.47860 |
| Si | 3.49960 | -0.16200 | -1.49180 |
| C  | 3.00360 | 0.82370  | -3.03800 |
| H  | 3.53660 | 0.48300  | -3.93200 |
| H  | 1.93050 | 0.71090  | -3.22910 |
| H  | 3.21220 | 1.89420  | -2.90650 |
| C  | 2.47540 | 0.37380  | 0.01550  |
| H  | 1.40600 | 0.26360  | -0.19650 |
| H  | 2.70090 | -0.22910 | 0.90160  |
| H  | 2.66290 | 1.42690  | 0.26560  |

Me<sub>2</sub>HSi-O-SiMe<sub>2</sub>H

|    |          |          |          |
|----|----------|----------|----------|
| Si | -2.84693 | 1.53819  | -0.42570 |
| H  | -3.92288 | 2.07660  | -1.31656 |
| O  | -2.66616 | -0.08868 | -0.71827 |
| Si | -3.08930 | -1.40774 | -1.63810 |
| H  | -2.28942 | -2.55038 | -1.10705 |
| C  | -3.35260 | 1.78749  | 1.36845  |
| H  | -2.58874 | 1.39736  | 2.05173  |
| H  | -3.48852 | 2.85351  | 1.58968  |
| H  | -4.29576 | 1.27548  | 1.59150  |
| C  | -1.23353 | 2.42616  | -0.80936 |
| H  | -0.41742 | 2.05195  | -0.17966 |
| H  | -0.94062 | 2.28700  | -1.85646 |
| H  | -1.33047 | 3.50400  | -0.62842 |
| C  | -4.92239 | -1.79168 | -1.44497 |
| H  | -5.18670 | -1.95398 | -0.39359 |
| H  | -5.54326 | -0.97145 | -1.82566 |
| H  | -5.18935 | -2.69876 | -2.00176 |
| C  | -2.64696 | -1.12971 | -3.44715 |
| H  | -1.58069 | -0.90545 | -3.56723 |
| H  | -2.87045 | -2.02395 | -4.04253 |
| H  | -3.21706 | -0.29476 | -3.87279 |

[Me<sub>2</sub>HSi-O-SiMe<sub>2</sub>]<sub>2</sub>

|    |          |          |          |
|----|----------|----------|----------|
| Si | -3.20310 | 1.42070  | 0.11210  |
| H  | -4.53370 | 1.22040  | 0.76610  |
| O  | -2.81780 | 0.04990  | -0.75540 |
| Si | -3.43390 | -1.29960 | -1.52520 |
| C  | -1.89360 | 1.67890  | 1.43560  |
| H  | -0.90290 | 1.82550  | 0.98910  |
| H  | -2.12350 | 2.56450  | 2.04110  |
| H  | -1.83460 | 0.81690  | 2.10990  |
| C  | -3.30530 | 2.90190  | -1.04450 |
| H  | -2.34710 | 3.07830  | -1.54780 |
| H  | -4.06890 | 2.75530  | -1.81710 |
| H  | -3.56350 | 3.81090  | -0.48670 |
| C  | -4.60300 | -0.77990 | -2.92840 |
| H  | -5.46330 | -0.21800 | -2.54890 |
| H  | -4.07530 | -0.14760 | -3.65600 |
| H  | -4.98270 | -1.66310 | -3.45530 |
| C  | -1.95950 | -2.27470 | -2.20720 |
| H  | -1.27930 | -2.58260 | -1.40620 |
| H  | -2.30230 | -3.17560 | -2.72910 |
| H  | -1.39180 | -1.66060 | -2.91970 |

Me<sub>2</sub>HSi-O-SiMe<sub>2</sub>H - TS1 doublet

|    |          |          |          |
|----|----------|----------|----------|
| Fe | -0.93140 | -0.01584 | 0.11374  |
| N  | -0.84159 | -0.28571 | 2.10707  |
| N  | -0.56554 | -1.96954 | -0.16140 |
| N  | -1.43247 | 1.93468  | 0.38935  |
| N  | -1.24660 | 0.21112  | -1.87457 |
| C  | -1.00680 | 0.67586  | 3.06996  |
| C  | -0.51122 | -2.63968 | -1.35961 |
| C  | -0.55818 | -1.44685 | 2.77806  |

|    |          |          |          |
|----|----------|----------|----------|
| C  | -0.32549 | -2.91809 | 0.80840  |
| C  | -1.50535 | 2.59706  | 1.58819  |
| C  | -1.09089 | -0.74751 | -2.84572 |
| C  | -1.68369 | 2.87252  | -0.57667 |
| C  | -1.52846 | 1.38397  | -2.54141 |
| C  | -0.82164 | 0.10664  | 4.38358  |
| C  | -0.21054 | -4.03508 | -1.14353 |
| C  | -0.54338 | -1.21451 | 4.20205  |
| C  | -0.09637 | -4.20808 | 0.20294  |
| C  | -1.81266 | 3.99316  | 1.37228  |
| C  | -1.30804 | -0.17520 | -4.15366 |
| C  | -1.91969 | 4.16494  | 0.02676  |
| C  | -1.57527 | 1.14601  | -3.96425 |
| H  | -0.89983 | 0.65976  | 5.31088  |
| H  | -0.11483 | -4.77303 | -1.92987 |
| H  | -0.34508 | -1.97279 | 4.94876  |
| H  | 0.11339  | -5.11724 | 0.75194  |
| H  | -1.92836 | 4.72749  | 2.15923  |
| H  | -1.25068 | -0.72628 | -5.08373 |
| H  | -2.14349 | 5.06977  | -0.52375 |
| H  | -1.78444 | 1.90536  | -4.70690 |
| C  | -1.31631 | 2.01323  | 2.83446  |
| C  | -0.75027 | -2.07432 | -2.60872 |
| C  | -1.72358 | 2.62080  | -1.94475 |
| C  | -0.32096 | -2.67896 | 2.17662  |
| H  | -1.41443 | 2.65670  | 3.70353  |
| H  | -0.66578 | -2.72698 | -3.47235 |
| H  | -1.93273 | 3.46091  | -2.59985 |
| H  | -0.11902 | -3.52246 | 2.82978  |
| O  | 0.70913  | 0.52210  | -0.02654 |
| S  | -3.38910 | -0.30318 | 0.10486  |
| C  | -3.79868 | -1.89633 | -0.68168 |
| H  | -3.34567 | -2.73604 | -0.14831 |
| H  | -4.88792 | -2.00481 | -0.68355 |
| H  | -3.45224 | -1.90966 | -1.72092 |
| H  | 1.70351  | -0.39155 | -0.02809 |
| Si | 3.19230  | -1.05185 | -0.06119 |
| C  | 3.35724  | -2.19980 | -1.54553 |
| H  | 3.12270  | -1.67595 | -2.47852 |
| H  | 4.38310  | -2.58350 | -1.61844 |
| H  | 2.67589  | -3.05322 | -1.45324 |
| C  | 3.52777  | -1.94411 | 1.56349  |
| H  | 3.41387  | -1.26680 | 2.41674  |
| H  | 2.83254  | -2.78044 | 1.69764  |
| H  | 4.55076  | -2.34174 | 1.57704  |
| O  | 4.25922  | 0.21321  | -0.22244 |
| Si | 4.34014  | 1.87495  | -0.39258 |
| H  | 5.79820  | 2.18637  | -0.48142 |
| C  | 3.59802  | 2.72688  | 1.10994  |
| H  | 4.09655  | 2.41715  | 2.03581  |
| H  | 3.68873  | 3.81720  | 1.02589  |
| H  | 2.53323  | 2.47850  | 1.19370  |
| C  | 3.47911  | 2.41643  | -1.97410 |
| H  | 3.57110  | 3.50044  | -2.11754 |
| H  | 3.90551  | 1.92245  | -2.85492 |
| H  | 2.41181  | 2.16960  | -1.92551 |

Me<sub>2</sub>HSi-O-SiMe<sub>2</sub>H - TS1 quartet

|    |          |          |          |
|----|----------|----------|----------|
| Fe | -0.97805 | -0.02491 | 0.10601  |
| N  | -0.85795 | -0.21111 | 2.11611  |
| N  | -0.42784 | -1.99369 | -0.07873 |
| N  | -1.58184 | 1.86797  | 0.30015  |
| N  | -1.29534 | 0.06176  | -1.87501 |
| C  | -1.06957 | 0.78103  | 3.03823  |
| C  | -0.30699 | -2.70382 | -1.24445 |
| C  | -0.45950 | -1.31845 | 2.82927  |
| C  | -0.09623 | -2.86018 | 0.93473  |
| C  | -1.69097 | 2.58273  | 1.46829  |
| C  | -1.02933 | -0.92148 | -2.80017 |
| C  | -1.96012 | 2.72428  | -0.70489 |
| C  | -1.70535 | 1.15777  | -2.59207 |
| C  | -0.81646 | 0.28641  | 4.36955  |
| C  | 0.12185  | -4.05507 | -0.96372 |
| C  | -0.43791 | -1.01563 | 4.23939  |
| C  | 0.25296  | -4.15133 | 0.38907  |
| C  | -2.13036 | 3.93121  | 1.18865  |
| C  | -1.30075 | -0.43541 | -4.13093 |
| C  | -2.29889 | 4.01844  | -0.15784 |
| C  | -1.72314 | 0.85324  | -4.00184 |
| H  | -0.91632 | 0.87391  | 5.27329  |
| H  | 0.28756  | -4.81743 | -1.71436 |
| H  | -0.16187 | -1.71936 | 5.01426  |
| H  | 0.54904  | -5.00931 | 0.97926  |
| H  | -2.29098 | 4.69269  | 1.94115  |
| H  | -1.17617 | -1.01778 | -5.03501 |
| H  | -2.62611 | 4.86685  | -0.74525 |
| H  | -2.01565 | 1.54942  | -4.77746 |
| C  | -1.45643 | 2.08438  | 2.74191  |
| C  | -0.57615 | -2.20400 | -2.51548 |
| C  | -2.02795 | 2.39814  | -2.05182 |
| C  | -0.10415 | -2.54792 | 2.28845  |
| H  | -1.58912 | 2.76591  | 3.57638  |
| H  | -0.42535 | -2.87434 | -3.35616 |
| H  | -2.34323 | 3.17585  | -2.74040 |
| H  | 0.18712  | -3.33000 | 2.98278  |
| O  | 0.66897  | 0.50844  | -0.04705 |
| S  | -3.15734 | -0.97185 | 0.49415  |
| C  | -3.81851 | -1.69726 | -1.04124 |
| H  | -3.17384 | -2.51573 | -1.37829 |
| H  | -4.80840 | -2.10708 | -0.81837 |
| H  | -3.89354 | -0.95260 | -1.83687 |
| H  | 1.70205  | -0.31421 | -0.02022 |
| Si | 3.26528  | -0.87718 | -0.06046 |
| C  | 3.51813  | -1.98731 | -1.56325 |
| H  | 3.24530  | -1.46905 | -2.48894 |
| H  | 4.57002  | -2.29188 | -1.63996 |
| H  | 2.90257  | -2.89056 | -1.48414 |
| C  | 3.68771  | -1.76968 | 1.54536  |
| H  | 3.51150  | -1.12667 | 2.41443  |
| H  | 3.07612  | -2.67162 | 1.65958  |
| H  | 4.74441  | -2.06703 | 1.54935  |
| O  | 4.23835  | 0.46516  | -0.20145 |
| Si | 4.23839  | 2.12369  | -0.40182 |
| H  | 5.67618  | 2.52466  | -0.34305 |
| C  | 3.28585  | 2.95590  | 0.98836  |
| H  | 3.70947  | 2.70994  | 1.96911  |
| H  | 3.30278  | 4.04740  | 0.87674  |
| H  | 2.24050  | 2.62520  | 0.97406  |
| C  | 3.53272  | 2.58760  | -2.08308 |

|   |         |         |          |
|---|---------|---------|----------|
| H | 3.60123 | 3.67063 | -2.24641 |
| H | 4.07351 | 2.09030 | -2.89668 |
| H | 2.47585 | 2.30311 | -2.15185 |

Me<sub>2</sub>HSi-O-SiMe<sub>2</sub>H - INT1 quartet

|    |          |          |          |
|----|----------|----------|----------|
| Fe | -1.12118 | -0.07434 | 0.19858  |
| N  | -0.71989 | 0.76454  | 1.99157  |
| N  | -0.20457 | -1.77816 | 0.79386  |
| N  | -2.00001 | 1.62759  | -0.40067 |
| N  | -1.62620 | -0.95533 | -1.53350 |
| C  | -0.96621 | 2.06138  | 2.36437  |
| C  | -0.03018 | -2.92138 | 0.05183  |
| C  | -0.09510 | 0.16478  | 3.05964  |
| C  | 0.34912  | -2.02707 | 2.02777  |
| C  | -2.06991 | 2.80926  | 0.29731  |
| C  | -1.24253 | -2.20409 | -1.96687 |
| C  | -2.67145 | 1.83668  | -1.58086 |
| C  | -2.33927 | -0.39230 | -2.56381 |
| C  | -0.49798 | 2.28371  | 3.71010  |
| C  | 0.67122  | -3.91023 | 0.83134  |
| C  | 0.03550  | 1.10757  | 4.14284  |
| C  | 0.89952  | -3.35863 | 2.05755  |
| C  | -2.78603 | 3.79555  | -0.47508 |
| C  | -1.74816 | -2.43898 | -3.29591 |
| C  | -3.16493 | 3.19140  | -1.63435 |
| C  | -2.43437 | -1.32070 | -3.66238 |
| H  | -0.57548 | 3.22565  | 4.23783  |
| H  | 0.93372  | -4.89837 | 0.47552  |
| H  | 0.49064  | 0.88293  | 5.09894  |
| H  | 1.39125  | -3.79933 | 2.91538  |
| H  | -2.97322 | 4.81047  | -0.14847 |
| H  | -1.58681 | -3.34822 | -3.86076 |
| H  | -3.72535 | 3.60669  | -2.46213 |
| H  | -2.95028 | -1.11841 | -4.59223 |
| C  | -1.58158 | 3.02597  | 1.57679  |
| C  | -0.49414 | -3.12068 | -1.24288 |
| C  | -2.84966 | 0.89894  | -2.58637 |
| C  | 0.39331  | -1.13370 | 3.09003  |
| H  | -1.71328 | 4.01444  | 2.00439  |
| H  | -0.27621 | -4.07407 | -1.71310 |
| H  | -3.39843 | 1.20686  | -3.47034 |
| H  | 0.86802  | -1.46897 | 4.00642  |
| O  | 0.45921  | 0.52888  | -0.49341 |
| S  | -3.07225 | -0.77566 | 1.22802  |
| C  | -3.67418 | -2.30430 | 0.42405  |
| H  | -2.92831 | -3.10046 | 0.49048  |
| H  | -4.57131 | -2.61469 | 0.96927  |
| H  | -3.93354 | -2.13335 | -0.62303 |
| H  | 1.19081  | -0.02875 | -0.15064 |
| Si | 3.78744  | -0.73647 | -0.19224 |
| C  | 3.97619  | -2.08513 | -1.50771 |
| H  | 3.50512  | -1.79001 | -2.45103 |
| H  | 5.03885  | -2.28538 | -1.70240 |
| H  | 3.50656  | -3.01543 | -1.16814 |
| C  | 4.59664  | -1.25443 | 1.43803  |
| H  | 4.47905  | -0.48195 | 2.20501  |
| H  | 4.14422  | -2.18026 | 1.81112  |
| H  | 5.67127  | -1.42986 | 1.29127  |

|    |         |         |          |
|----|---------|---------|----------|
| O  | 4.50596 | 0.67180 | -0.72026 |
| Si | 4.18432 | 2.19355 | -1.33767 |
| H  | 5.52079 | 2.84089 | -1.49391 |
| C  | 3.12820 | 3.17402 | -0.13154 |
| H  | 3.60950 | 3.25891 | 0.84973  |
| H  | 2.94635 | 4.18862 | -0.50789 |
| H  | 2.15680 | 2.68225 | 0.00222  |
| C  | 3.34732 | 2.06428 | -3.01693 |
| H  | 3.21029 | 3.05989 | -3.45767 |
| H  | 3.93872 | 1.46470 | -3.71856 |
| H  | 2.35745 | 1.60196 | -2.92080 |

|    |          |          |          |
|----|----------|----------|----------|
| C  | -4.53565 | -0.17544 | -0.12277 |
| C  | -5.13541 | 1.08196  | 0.08805  |
| C  | -5.08778 | -1.01175 | -1.11289 |
| C  | -6.24442 | 1.48617  | -0.65656 |
| H  | -4.73499 | 1.75228  | 0.84565  |
| C  | -6.19691 | -0.61092 | -1.85953 |
| H  | -4.65022 | -1.98996 | -1.30045 |
| C  | -6.77756 | 0.63970  | -1.63248 |
| H  | -6.69381 | 2.45907  | -0.47486 |
| H  | -6.60931 | -1.27376 | -2.61589 |
| H  | -7.64159 | 0.95293  | -2.21265 |
| Si | -3.02438 | -0.70130 | 0.85645  |
| H  | -3.07895 | -0.10516 | 2.22296  |
| H  | -2.99049 | -2.18898 | 0.95851  |

PhSiH<sub>3</sub> - TS1 doublet

|    |          |          |          |
|----|----------|----------|----------|
| Fe | 0.98282  | 0.10272  | 0.04476  |
| N  | 1.53380  | 1.75545  | -0.99991 |
| N  | 1.47443  | -1.02990 | -1.56379 |
| N  | 0.72377  | 1.21269  | 1.70221  |
| N  | 0.60075  | -1.55263 | 1.11426  |
| C  | 1.51629  | 3.04828  | -0.54098 |
| C  | 1.35208  | -2.39508 | -1.66579 |
| C  | 1.89897  | 1.82804  | -2.31852 |
| C  | 1.85149  | -0.58867 | -2.81514 |
| C  | 0.82871  | 2.57719  | 1.79185  |
| C  | 0.59879  | -2.84474 | 0.65092  |
| C  | 0.36730  | 0.78002  | 2.95403  |
| C  | 0.26017  | -1.63237 | 2.44707  |
| C  | 1.88551  | 3.96111  | -1.59846 |
| C  | 1.68989  | -2.82858 | -3.00113 |
| C  | 2.12046  | 3.20278  | -2.70382 |
| C  | 1.99652  | -1.70941 | -3.71243 |
| C  | 0.52478  | 3.01657  | 3.13231  |
| C  | 0.23627  | -3.75823 | 1.70758  |
| C  | 0.23984  | 1.89807  | 3.85604  |
| C  | 0.02993  | -3.00583 | 2.82389  |
| H  | 1.95034  | 5.03618  | -1.48958 |
| H  | 1.67982  | -3.85867 | -3.33391 |
| H  | 2.42007  | 3.52409  | -3.69310 |
| H  | 2.29175  | -1.62992 | -4.75082 |
| H  | 0.53721  | 4.04849  | 3.45914  |
| H  | 0.16234  | -4.83226 | 1.59409  |
| H  | -0.03216 | 1.81949  | 4.90083  |
| H  | -0.25098 | -3.33288 | 3.81678  |
| C  | 1.19441  | 3.43164  | 0.75481  |
| C  | 0.94324  | -3.23858 | -0.64009 |
| C  | 0.15658  | -0.54878 | 3.30927  |
| C  | 2.04421  | 0.73710  | -3.17085 |
| H  | 1.23205  | 4.49281  | 0.98148  |
| H  | 0.89136  | -4.29996 | -0.86303 |
| H  | -0.11760 | -0.75370 | 4.33955  |
| H  | 2.33421  | 0.94093  | -4.19697 |
| O  | -0.62414 | 0.30640  | -0.54790 |
| S  | 3.44167  | -0.09742 | 0.39327  |
| C  | 3.83285  | -1.77993 | 0.97051  |
| H  | 3.54829  | -2.51406 | 0.20797  |
| H  | 4.91391  | -1.84838 | 1.12538  |
| H  | 3.30745  | -2.01691 | 1.89908  |
| H  | -1.62686 | -0.18782 | 0.13790  |

PhSiH<sub>3</sub> - TS1 quartet

|    |          |          |          |
|----|----------|----------|----------|
| Fe | -1.04394 | 0.06997  | 0.07144  |
| N  | -2.42179 | 1.21399  | -0.82209 |
| N  | -0.08331 | 1.71464  | 0.72117  |
| N  | -2.11215 | -1.58442 | -0.36542 |
| N  | 0.30218  | -1.09763 | 1.07863  |
| C  | -3.54083 | 0.78664  | -1.49163 |
| C  | 1.08977  | 1.76113  | 1.43554  |
| C  | -2.42928 | 2.58394  | -0.90953 |
| C  | -0.39506 | 3.01717  | 0.41886  |
| C  | -3.27386 | -1.63640 | -1.09470 |
| C  | 1.40106  | -0.66828 | 1.78048  |
| C  | -1.77667 | -2.89019 | -0.08991 |
| C  | 0.30074  | -2.46961 | 1.17527  |
| C  | -4.26391 | 1.91599  | -2.03072 |
| C  | 1.51516  | 3.12856  | 1.60483  |
| C  | -3.57406 | 3.03106  | -1.66997 |
| C  | 0.59266  | 3.90857  | 0.97506  |
| C  | -3.69221 | -3.00532 | -1.26923 |
| C  | 2.11295  | -1.79739 | 2.33286  |
| C  | -2.76150 | -3.78280 | -0.64911 |
| C  | 1.43168  | -2.91440 | 1.95436  |
| H  | -5.18019 | 1.84232  | -2.60241 |
| H  | 2.40864  | 3.43308  | 2.13458  |
| H  | -3.80391 | 4.06734  | -1.88230 |
| H  | 0.57111  | 4.98668  | 0.88034  |
| H  | -4.58152 | -3.31296 | -1.80416 |
| H  | 3.01164  | -1.72449 | 2.93200  |
| H  | -2.72846 | -4.86176 | -0.56834 |
| H  | 1.65573  | -3.94978 | 2.17708  |
| C  | -3.94547 | -0.53586 | -1.61592 |
| C  | 1.77605  | 0.66140  | 1.93971  |
| C  | -0.65570 | -3.30714 | 0.61782  |
| C  | -1.49101 | 3.42834  | -0.33202 |
| H  | -4.85756 | -0.72781 | -2.17241 |
| H  | 2.68402  | 0.85853  | 2.50100  |
| H  | -0.52682 | -4.37571 | 0.75894  |
| H  | -1.61829 | 4.49560  | -0.48430 |
| O  | -0.13806 | 0.01185  | -1.39445 |
| S  | -2.27779 | -0.10887 | 2.15892  |
| C  | -1.46755 | 0.86816  | 3.46477  |
| H  | -1.39680 | 1.92328  | 3.19088  |
| H  | -2.05463 | 0.75736  | 4.38152  |

|    |          |          |          |
|----|----------|----------|----------|
| H  | -0.45981 | 0.48146  | 3.65197  |
| H  | 0.96783  | -0.67804 | -1.49634 |
| C  | 3.92517  | -0.54993 | -1.53870 |
| C  | 4.36447  | 0.58332  | -2.25211 |
| C  | 4.69477  | -0.97430 | -0.43756 |
| C  | 5.52744  | 1.26140  | -1.88468 |
| H  | 3.79494  | 0.93808  | -3.10847 |
| C  | 5.86000  | -0.29931 | -0.06827 |
| H  | 4.38273  | -1.84445 | 0.13511  |
| C  | 6.27864  | 0.82055  | -0.79131 |
| H  | 5.84987  | 2.13069  | -2.45202 |
| H  | 6.44316  | -0.64895 | 0.78002  |
| H  | 7.18620  | 1.34616  | -0.50596 |
| Si | 2.34996  | -1.44706 | -3.02833 |
| H  | 2.23726  | -1.48305 | -3.51662 |
| H  | 2.39160  | -2.84478 | -1.50938 |

|    |          |          |          |
|----|----------|----------|----------|
| H  | 4.21474  | 1.80277  | 0.04510  |
| H  | 4.88667  | 1.62527  | -1.59492 |
| H  | 3.30389  | 2.40513  | -1.36681 |
| H  | -1.09713 | 0.16592  | 0.16569  |
| C  | -5.01467 | 0.43599  | 0.53307  |
| C  | -5.82723 | -0.41988 | -0.24096 |
| C  | -5.21502 | 0.45513  | 1.93006  |
| C  | -6.81055 | -1.20929 | 0.35415  |
| H  | -5.69437 | -0.46316 | -1.31969 |
| C  | -6.19810 | -0.33421 | 2.52543  |
| H  | -4.60008 | 1.09760  | 2.55614  |
| C  | -6.99882 | -1.16817 | 1.73902  |
| H  | -7.43127 | -1.85575 | -0.26068 |
| H  | -6.34115 | -0.29950 | 3.60221  |
| H  | -7.76429 | -1.78416 | 2.20316  |
| Si | -3.67494 | 1.46036  | -0.25739 |
| H  | -3.99163 | 1.77394  | -1.68020 |
| H  | -3.39587 | 2.70267  | 0.51734  |

PhSiH<sub>3</sub> - INT1 doublet

|    |          |          |          |
|----|----------|----------|----------|
| Fe | 1.19256  | -0.11312 | -0.09900 |
| N  | 1.85682  | -1.67731 | 0.97522  |
| N  | 1.86382  | 1.14779  | 1.31097  |
| N  | 0.61628  | -1.37186 | -1.57085 |
| N  | 0.51081  | 1.44934  | -1.17440 |
| C  | 1.72384  | -3.00791 | 0.66092  |
| C  | 1.65468  | 2.50634  | 1.36690  |
| C  | 2.54180  | -1.62763 | 2.16439  |
| C  | 2.54089  | 0.81342  | 2.45880  |
| C  | 0.65552  | -2.74318 | -1.53913 |
| C  | 0.50145  | 2.77030  | -0.79045 |
| C  | 0.06706  | -1.02654 | -2.78286 |
| C  | -0.02460 | 1.40943  | -2.44210 |
| C  | 2.32573  | -3.81913 | 1.69139  |
| C  | 2.23238  | 3.04223  | 2.57383  |
| C  | 2.84045  | -2.96450 | 2.61740  |
| C  | 2.79039  | 1.99606  | 3.24463  |
| C  | 0.12429  | -3.27835 | -2.76835 |
| C  | -0.07252 | 3.57985  | -1.83483 |
| C  | -0.23197 | -2.21538 | -3.54191 |
| C  | -0.38927 | 2.73873  | -2.86043 |
| H  | 2.34940  | -4.90130 | 1.68275  |
| H  | 2.20510  | 4.08747  | 2.85411  |
| H  | 3.37118  | -3.19719 | 3.53169  |
| H  | 3.31172  | 2.00217  | 4.19328  |
| H  | 0.04475  | -4.33434 | -2.99252 |
| H  | -0.19850 | 4.65352  | -1.77885 |
| H  | -0.66993 | -2.21619 | -4.53182 |
| H  | -0.83365 | 2.97934  | -3.81765 |
| C  | 1.15170  | -3.51459 | -0.49643 |
| C  | 1.01043  | 3.26762  | 0.40261  |
| C  | -0.21883 | 0.26463  | -3.20333 |
| C  | 2.88408  | -0.47308 | 2.85219  |
| H  | 1.11978  | -4.59315 | -0.61064 |
| H  | 0.92690  | 4.33516  | 0.57800  |
| H  | -0.65730 | 0.38636  | -4.18842 |
| H  | 3.42339  | -0.58529 | 3.78695  |
| O  | -0.42757 | -0.26920 | 0.73089  |
| S  | 3.21187  | -0.03359 | -1.23140 |
| C  | 3.96635  | 1.61615  | -1.00205 |

PhSiH<sub>3</sub> - INT1 quartet

|    |          |          |          |
|----|----------|----------|----------|
| Fe | -1.18057 | 0.03522  | 0.10819  |
| N  | -2.68992 | 0.89896  | -0.89335 |
| N  | -0.36307 | 1.83696  | 0.45021  |
| N  | -2.06179 | -1.76747 | -0.12178 |
| N  | 0.36131  | -0.84478 | 1.07855  |
| C  | -3.74845 | 0.26495  | -1.49908 |
| C  | 0.86357  | 2.09154  | 1.01997  |
| C  | -2.88622 | 2.24534  | -1.08511 |
| C  | -0.86997 | 3.05454  | 0.06609  |
| C  | -3.20477 | -2.03845 | -0.83071 |
| C  | 1.47953  | -0.22389 | 1.58264  |
| C  | -1.60179 | -2.97458 | 0.35026  |
| C  | 0.48557  | -2.17971 | 1.38749  |
| C  | -4.62084 | 1.23841  | -2.10988 |
| C  | 1.12150  | 3.50937  | 1.01520  |
| C  | -4.09135 | 2.46445  | -1.84702 |
| C  | 0.04433  | 4.10656  | 0.43292  |
| C  | -3.48325 | -3.45274 | -0.79270 |
| C  | 2.34218  | -1.19646 | 2.20405  |
| C  | -2.49420 | -4.03137 | -0.05629 |
| C  | 1.72307  | -2.40584 | 2.08985  |
| H  | -5.52324 | 0.99442  | -2.65571 |
| H  | 2.01851  | 3.96980  | 1.40907  |
| H  | -4.46487 | 3.43876  | -2.13498 |
| H  | -0.12610 | 5.15887  | 0.24489  |
| H  | -4.33005 | -3.92352 | -1.27539 |
| H  | 3.29212  | -0.96456 | 2.66790  |
| H  | -2.35703 | -5.07680 | 0.18860  |
| H  | 2.05973  | -3.37279 | 2.44128  |
| C  | -3.99030 | -1.10022 | -1.48757 |
| C  | 1.73051  | 1.14190  | 1.54074  |
| C  | -0.42818 | -3.17356 | 1.06321  |
| C  | -2.05546 | 3.25669  | -0.62811 |
| H  | -4.87171 | -1.45928 | -2.00857 |
| H  | 2.66525  | 1.49362  | 1.96464  |
| H  | -0.19397 | -4.18802 | 1.36904  |
| H  | -2.33336 | 4.27963  | -0.85984 |
| O  | -0.27130 | -0.14666 | -1.46800 |

|    |          |          |          |
|----|----------|----------|----------|
| S  | -2.37836 | 0.10702  | 2.08283  |
| C  | -1.52668 | 1.19617  | 3.28039  |
| H  | -1.48401 | 2.22857  | 2.92677  |
| H  | -2.10800 | 1.15848  | 4.20728  |
| H  | -0.51475 | 0.83710  | 3.48389  |
| H  | 0.49082  | -0.73447 | -1.29955 |
| C  | 4.42569  | -0.58807 | -1.50911 |
| C  | 4.58344  | 0.77563  | -1.83712 |
| C  | 5.26704  | -1.13116 | -0.51458 |
| C  | 5.55275  | 1.55804  | -1.21018 |
| H  | 3.94655  | 1.22698  | -2.59442 |
| C  | 6.23727  | -0.34934 | 0.11193  |
| H  | 5.16869  | -2.17771 | -0.23547 |
| C  | 6.38284  | 0.99762  | -0.23433 |
| H  | 5.66345  | 2.60399  | -1.48398 |
| H  | 6.88312  | -0.79015 | 0.86695  |
| H  | 7.13953  | 1.60679  | 0.25281  |
| Si | 3.10532  | -1.62243 | -2.32083 |
| H  | 2.82753  | -1.17680 | -3.71527 |
| H  | 3.44347  | -3.07418 | -2.27556 |

BnSiH<sub>3</sub> - TS1 doublet

|    |          |          |          |
|----|----------|----------|----------|
| Fe | 1.35898  | 0.07580  | 0.05099  |
| N  | 2.47074  | 0.87998  | -1.44672 |
| N  | 1.80349  | -1.77107 | -0.65676 |
| N  | 1.12538  | 1.89448  | 0.87747  |
| N  | 0.39036  | -0.74292 | 1.60725  |
| C  | 2.71802  | 2.21391  | -1.64960 |
| C  | 1.36682  | -2.97026 | -0.14592 |
| C  | 3.04773  | 0.22465  | -2.50192 |
| C  | 2.47417  | -2.07817 | -1.82270 |
| C  | 1.56471  | 3.08666  | 0.36157  |
| C  | 0.15132  | -2.07845 | 1.81857  |
| C  | 0.45461  | 2.20814  | 2.03162  |
| C  | -0.18150 | -0.08785 | 2.67680  |
| C  | 3.47433  | 2.40501  | -2.86612 |
| C  | 1.79793  | -4.05973 | -0.98938 |
| C  | 3.67577  | 1.16874  | -3.39793 |
| C  | 2.48033  | -3.50610 | -2.02893 |
| C  | 1.15928  | 4.18027  | 1.21113  |
| C  | -0.59899 | -2.27036 | 3.03618  |
| C  | 0.46903  | 3.63351  | 2.25075  |
| C  | -0.80402 | -1.03458 | 3.57016  |
| H  | 3.79841  | 3.36572  | -3.24533 |
| H  | 1.58787  | -5.10464 | -0.79986 |
| H  | 4.20178  | 0.90040  | -4.30514 |
| H  | 2.94864  | -4.00288 | -2.86895 |
| H  | 1.38370  | 5.22233  | 1.02269  |
| H  | -0.91316 | -3.23254 | 3.41999  |
| H  | 0.00805  | 4.13267  | 3.09339  |
| H  | -1.32272 | -0.77039 | 4.48278  |
| C  | 2.30549  | 3.23908  | -0.80802 |
| C  | 0.60032  | -3.11506 | 1.00423  |
| C  | -0.15277 | 1.28563  | 2.87826  |
| C  | 3.04542  | -1.15527 | -2.68508 |
| H  | 2.58095  | 4.25125  | -1.08856 |
| H  | 0.32838  | -4.12527 | 1.29499  |
| H  | -0.64493 | 1.67066  | 3.76606  |

|    |          |          |          |
|----|----------|----------|----------|
| H  | 3.53775  | -1.54117 | -3.57240 |
| O  | -0.02247 | 0.20245  | -0.98262 |
| S  | 3.59549  | -0.24395 | 1.09189  |
| C  | 3.45996  | -1.45303 | 2.44741  |
| H  | 3.13538  | -2.42382 | 2.05565  |
| H  | 4.44989  | -1.57871 | 2.89653  |
| H  | 2.74579  | -1.12474 | 3.20686  |
| H  | -1.20369 | 0.10922  | -0.44796 |
| C  | -3.89482 | 0.09617  | -1.58791 |
| Si | -2.80546 | 0.05863  | -0.01898 |
| H  | -3.11828 | 1.23751  | 0.84220  |
| H  | -3.09201 | -1.18016 | 0.76230  |
| H  | -3.63802 | 0.99731  | -2.15687 |
| H  | -3.62217 | -0.76515 | -2.20899 |
| C  | -5.36484 | 0.07281  | -1.24406 |
| C  | -6.07698 | 1.26600  | -1.03509 |
| C  | -6.05366 | -1.14317 | -1.09762 |
| C  | -7.43153 | 1.24529  | -0.69924 |
| H  | -5.56379 | 2.21871  | -1.14626 |
| C  | -7.40817 | -1.16619 | -0.76185 |
| H  | -5.52220 | -2.07874 | -1.25778 |
| C  | -8.10415 | 0.02851  | -0.56042 |
| H  | -7.96282 | 2.18183  | -0.54974 |
| H  | -7.92118 | -2.11934 | -0.66145 |
| H  | -9.15934 | 0.01157  | -0.30155 |

BnSiH<sub>3</sub> - TS1 quartet

|    |          |          |          |
|----|----------|----------|----------|
| Fe | -1.40355 | 0.06281  | 0.01445  |
| N  | -1.29632 | 1.98644  | 0.62638  |
| N  | -0.38984 | -0.49632 | 1.70184  |
| N  | -2.48223 | 0.61215  | -1.57943 |
| N  | -1.68782 | -1.87136 | -0.44680 |
| C  | -1.78733 | 3.08028  | -0.04087 |
| C  | -0.07424 | -1.77609 | 2.08313  |
| C  | -0.63878 | 2.47691  | 1.73064  |
| C  | 0.13515  | 0.32986  | 2.66978  |
| C  | -2.81111 | 1.89203  | -1.94985 |
| C  | -1.16731 | -2.96296 | 0.20764  |
| C  | -3.02687 | -0.20974 | -2.53441 |
| C  | -2.32982 | -2.36464 | -1.55625 |
| C  | -1.44671 | 4.29012  | 0.66652  |
| C  | 0.67144  | -1.75981 | 3.31982  |
| C  | -0.73216 | 3.91550  | 1.76408  |
| C  | 0.80291  | -0.45383 | 3.68205  |
| C  | -3.56782 | 1.87759  | -3.18138 |
| C  | -1.50918 | -4.17392 | -0.49700 |
| C  | -3.70157 | 0.57373  | -3.54403 |
| C  | -2.23216 | -3.80287 | -1.59053 |
| H  | -1.72233 | 5.28720  | 0.34770  |
| H  | 1.03882  | -2.64175 | 3.82878  |
| H  | -0.29965 | 4.54084  | 2.53451  |
| H  | 1.29937  | -0.04087 | 4.55082  |
| H  | -3.94311 | 2.76093  | -3.68205 |
| H  | -1.22199 | -5.16943 | -0.18328 |
| H  | -4.20977 | 0.15951  | -4.40539 |
| H  | -2.66070 | -4.42974 | -2.36193 |
| C  | -2.49567 | 3.04135  | -1.23726 |



|    |          |          |          |
|----|----------|----------|----------|
| C  | -0.42672 | -2.92605 | 1.38404  |
| C  | -2.96304 | -1.59639 | -2.52693 |
| C  | 0.03121  | 1.71399  | 2.67978  |
| H  | -2.82653 | 3.98952  | -1.64956 |
| H  | -0.09637 | -3.87667 | 1.79141  |
| H  | -3.43692 | -2.12371 | -3.34903 |
| H  | 0.50404  | 2.24439  | 3.50042  |
| O  | 0.04392  | 0.16664  | -0.92500 |
| S  | -3.29703 | 0.05266  | 1.52999  |
| C  | -3.72940 | -1.65480 | 1.99261  |
| H  | -2.89205 | -2.12363 | 2.52084  |
| H  | -4.58591 | -1.61319 | 2.67222  |
| H  | -3.97598 | -2.25685 | 1.11506  |
| H  | 1.20990  | 0.10077  | -0.36132 |
| C  | 3.89131  | 0.05619  | -1.53567 |
| Si | 2.83092  | 0.06995  | 0.05480  |
| H  | 3.13846  | -1.14051 | 0.87269  |
| H  | 3.16504  | 1.27687  | 0.86842  |
| H  | 3.60571  | -0.82339 | -2.12445 |
| H  | 3.62346  | 0.93966  | -2.12692 |
| C  | 5.36772  | 0.04174  | -1.22156 |
| C  | 6.06091  | -1.17006 | -1.06121 |
| C  | 6.08304  | 1.23989  | -1.05554 |
| C  | 7.42224  | -1.18448 | -0.75380 |
| H  | 5.52714  | -2.10939 | -1.18826 |
| C  | 7.44436  | 1.22781  | -0.74809 |
| H  | 5.56663  | 2.18946  | -1.17798 |
| C  | 8.12111  | 0.01498  | -0.59517 |
| H  | 7.93828  | -2.13474 | -0.64211 |
| H  | 7.97772  | 2.16790  | -0.63180 |
| H  | 9.18159  | 0.00469  | -0.35846 |

BnSiH<sub>3</sub> - INT1 quartet

|    |          |          |          |
|----|----------|----------|----------|
| Fe | -1.61365 | 0.05254  | 0.03233  |
| N  | -1.51395 | 2.03175  | 0.42266  |
| N  | -0.60564 | -0.33220 | 1.74381  |
| N  | -2.57535 | 0.43982  | -1.68642 |
| N  | -1.81766 | -1.91823 | -0.28856 |
| C  | -1.93100 | 3.05139  | -0.39503 |
| C  | -0.23116 | -1.56653 | 2.21889  |
| C  | -0.96241 | 2.62543  | 1.53391  |
| C  | -0.17780 | 0.58788  | 2.67287  |
| C  | -2.84704 | 1.67784  | -2.21812 |
| C  | -1.26211 | -2.93622 | 0.45272  |
| C  | -3.11705 | -0.47857 | -2.55290 |
| C  | -2.45188 | -2.51690 | -1.35027 |
| C  | -1.64943 | 4.32350  | 0.22249  |
| C  | 0.47245  | -1.41875 | 3.46776  |
| C  | -1.05550 | 4.05961  | 1.41962  |
| C  | 0.49950  | -0.08543 | 3.75196  |
| C  | -3.55837 | 1.53285  | -3.46500 |
| C  | -1.57733 | -4.20823 | -0.14664 |
| C  | -3.73196 | 0.19835  | -3.66863 |
| C  | -2.32099 | -3.94934 | -1.25830 |
| H  | -1.88194 | 5.28373  | -0.21987 |
| H  | 0.87813  | -2.24044 | 4.04390  |
| H  | -0.69547 | 4.75822  | 2.16396  |
| H  | 0.93456  | 0.41357  | 4.60836  |

|    |          |          |          |
|----|----------|----------|----------|
| H  | -3.88307 | 2.35953  | -4.08376 |
| H  | -1.25907 | -5.16547 | 0.24609  |
| H  | -4.22540 | -0.30182 | -4.49208 |
| H  | -2.73696 | -4.64932 | -1.97152 |
| C  | -2.54029 | 2.89688  | -1.63343 |
| C  | -0.51787 | -2.78371 | 1.61341  |
| C  | -3.07975 | -1.85574 | -2.39744 |
| C  | -0.35117 | 1.96290  | 2.58891  |
| H  | -2.81978 | 3.79682  | -2.17122 |
| H  | -0.15108 | -3.68343 | 2.09648  |
| H  | -3.54548 | -2.46231 | -3.16716 |
| H  | 0.04427  | 2.56737  | 3.39866  |
| O  | -0.02560 | 0.09881  | -0.87345 |
| S  | -3.58792 | 0.15682  | 1.22628  |
| C  | -3.94724 | -1.47752 | 1.96461  |
| H  | -3.14131 | -1.79005 | 2.63342  |
| H  | -4.86620 | -1.36282 | 2.54836  |
| H  | -4.10291 | -2.24008 | 1.19849  |
| H  | 0.68771  | 0.15759  | -0.20776 |
| C  | 4.42095  | 0.39501  | -1.18174 |
| Si | 3.54820  | 0.01851  | 0.47951  |
| H  | 3.78102  | -1.39922 | 0.88948  |
| H  | 4.06032  | 0.91401  | 1.56110  |
| H  | 3.98428  | -0.24882 | -1.95267 |
| H  | 4.20226  | 1.43193  | -1.45866 |
| C  | 5.90723  | 0.16351  | -1.05005 |
| C  | 6.46724  | -1.09770 | -1.31786 |
| C  | 6.76498  | 1.19615  | -0.63306 |
| C  | 7.83856  | -1.31661 | -1.18253 |
| H  | 5.82085  | -1.90929 | -1.64429 |
| C  | 8.13648  | 0.97820  | -0.49729 |
| H  | 6.35187  | 2.18034  | -0.42358 |
| C  | 8.68005  | -0.27977 | -0.77068 |
| H  | 8.25071  | -2.29791 | -1.40319 |
| H  | 8.78187  | 1.79381  | -0.18143 |
| H  | 9.74827  | -0.44936 | -0.66712 |

BnSiH<sub>3</sub> - INT1 doublet

|    |          |          |          |
|----|----------|----------|----------|
| Fe | -1.59476 | 0.05290  | 0.03682  |
| N  | -1.49677 | 2.03195  | 0.42928  |
| N  | -0.57575 | -0.33333 | 1.73561  |
| N  | -2.58057 | 0.44335  | -1.67208 |
| N  | -1.79987 | -1.91783 | -0.28740 |
| C  | -1.92392 | 3.05231  | -0.38271 |
| C  | -0.19513 | -1.56864 | 2.20565  |
| C  | -0.93836 | 2.62464  | 1.53706  |
| C  | -0.14430 | 0.58552  | 2.66533  |
| C  | -2.86024 | 1.68155  | -2.19780 |
| C  | -1.23542 | -2.93685 | 0.44493  |
| C  | -3.12927 | -0.47432 | -2.53418 |
| C  | -2.44419 | -2.51425 | -1.34454 |
| C  | -1.63941 | 4.32384  | 0.23488  |
| C  | 0.51481  | -1.42202 | 3.45067  |
| C  | -1.03515 | 4.05892  | 1.42654  |
| C  | 0.54001  | -0.08939 | 3.73848  |
| C  | -3.58548 | 1.53800  | -3.43689 |
| C  | -1.55380 | -4.20771 | -0.15529 |
| C  | -3.75841 | 0.20349  | -3.64151 |

|    |          |          |          |
|----|----------|----------|----------|
| C  | -2.30925 | -3.94676 | -1.25845 |
| H  | -1.87795 | 5.28442  | -0.20351 |
| H  | 0.92585  | -2.24422 | 4.02228  |
| H  | -0.67077 | 4.75674  | 2.16949  |
| H  | 0.97869  | 0.40823  | 4.59384  |
| H  | -3.91859 | 2.36533  | -4.05029 |
| H  | -1.22980 | -5.16552 | 0.23131  |
| H  | -4.25980 | -0.29601 | -4.46056 |
| H  | -2.73127 | -4.64529 | -1.96954 |
| C  | -2.54721 | 2.89982  | -1.61418 |
| C  | -0.48179 | -2.78528 | 1.59971  |
| C  | -3.08546 | -1.85197 | -2.38267 |
| C  | -0.31980 | 1.96037  | 2.58669  |
| H  | -2.83397 | 3.80071  | -2.14653 |
| H  | -0.10872 | -3.68485 | 2.07817  |
| H  | -3.55779 | -2.45800 | -3.14879 |
| H  | 0.07978  | 2.56291  | 3.39583  |
| O  | -0.02369 | 0.10672  | -0.89561 |
| S  | -3.57452 | 0.14731  | 1.23501  |
| C  | -3.90784 | -1.48361 | 1.99291  |
| H  | -3.09273 | -1.78139 | 2.65725  |
| H  | -4.82251 | -1.37244 | 2.58424  |
| H  | -4.06380 | -2.25560 | 1.23632  |
| H  | 0.70406  | 0.16094  | -0.24350 |
| C  | 4.36930  | 0.36320  | -1.21153 |
| Si | 3.49305  | -0.00868 | 0.44858  |
| H  | 3.74210  | -1.41864 | 0.87474  |
| H  | 3.98372  | 0.90609  | 1.52369  |
| H  | 3.94736  | -0.29577 | -1.97785 |
| H  | 4.13631  | 1.39350  | -1.50113 |
| C  | 5.85810  | 0.15622  | -1.06786 |
| C  | 6.43952  | -1.09867 | -1.31924 |
| C  | 6.69672  | 1.20637  | -0.65567 |
| C  | 7.81318  | -1.29458 | -1.17281 |
| H  | 5.80815  | -1.92354 | -1.64176 |
| C  | 8.07052  | 1.01139  | -0.50881 |
| H  | 6.26682  | 2.18597  | -0.45884 |
| C  | 8.63553  | -0.24054 | -0.76599 |
| H  | 8.24214  | -2.27140 | -1.38093 |
| H  | 8.70093  | 1.84016  | -0.19701 |
| H  | 9.70557  | -0.39225 | -0.65382 |

#### BnSiH<sub>3</sub>

|    |         |          |          |
|----|---------|----------|----------|
| C  | 3.92972 | 0.28308  | -1.61720 |
| Si | 2.84466 | 0.73335  | -0.11891 |
| H  | 2.97366 | -0.29743 | 0.94703  |
| H  | 3.25497 | 2.04744  | 0.44690  |
| H  | 3.56003 | -0.66607 | -2.02460 |
| H  | 3.76580 | 1.04402  | -2.39023 |
| C  | 5.39823 | 0.18021  | -1.27172 |
| C  | 5.95509 | -1.03506 | -0.84267 |
| C  | 6.23772 | 1.30308  | -1.34770 |
| C  | 7.30643 | -1.12681 | -0.50400 |
| H  | 5.32369 | -1.91881 | -0.78032 |
| C  | 7.58938 | 1.21435  | -1.00978 |
| H  | 5.82791 | 2.25388  | -1.68177 |
| C  | 8.13040 | -0.00176 | -0.58563 |
| H  | 7.71593 | -2.08011 | -0.17963 |
| H  | 8.22075 | 2.09629  | -1.08192 |
| H  | 9.18286 | -0.07259 | -0.32484 |
| H  | 1.41124 | 0.81980  | -0.51987 |

#### PhSiH<sub>3</sub>

|    |         |          |          |
|----|---------|----------|----------|
| C  | 5.35754 | 0.04311  | -1.23993 |
| C  | 6.07222 | -1.16684 | -1.16187 |
| C  | 6.05484 | 1.23900  | -0.98708 |
| C  | 7.42988 | -1.18319 | -0.83574 |
| H  | 5.56733 | -2.10966 | -1.36166 |
| C  | 7.41269 | 1.22747  | -0.66047 |
| H  | 5.53591 | 2.19314  | -1.04910 |
| C  | 8.10231 | 0.01518  | -0.58359 |
| H  | 7.96291 | -2.12889 | -0.78234 |
| H  | 7.93213 | 2.16305  | -0.47023 |
| H  | 9.15963 | 0.00446  | -0.33235 |
| Si | 3.52256 | 0.06058  | -1.64619 |
| H  | 3.18947 | -1.06105 | -2.56643 |
| H  | 2.67808 | -0.09007 | -0.42691 |
| H  | 3.15806 | 1.35029  | -2.29358 |

## Supplementary References

1. a) S. B. J. Kan, R. D. Lewis, K. Chen, F. H. Arnold, *Science* **2016**, *354*, 1048–1051. The synthesis of silanes **1c** and **1g** is reported: b) P. Volkova, P. Chizhova, M. Vinogradova, *Russ. Chem. Bull.* **1999**, *48*, 1712–1716 (**1c**). c) M. Lee, S. Ko, S. Chang, *J. Am. Chem. Soc.* **2000**, *122*, 12011–12012 (**1g**).
2. J. Sambrook, D. Russell, *Cold Spring Harb. Protoc.* **2006**. doi:10.1101/pdb.prot3933.
3. S. Kille, C. G. Acevedo-Rocha, L. P. Parra, Z.-G. Zhang, D. J. Opperman, M. T. Reetz, J. P. Acevedo, *ACS Synth. Biol.* **2013**, *2*, 83–92.
4. D. G. Gibson, L. Young, R.-Y. Chuang, J. C. Venter, C. A. Hutchison, H. O. Smith, *Nat. Methods* **2009**, *6*, 343–345.
5. D. Hanahan, *J. Mol. Biol.* **1983**, *166*, 557–580.
6. F. W. Studier, *Protein Expr. Purif.* **2005**, *41*, 207–234.
7. F. P. Guengerich, M. V. Martin, C. D. Sohl, Q. Cheng, *Nat. Protoc.* **2009**, *4*, 1245–1251.
8. S. Tuokko, P. M. Pihko, *Synlett* **2016**, *27* 1649–1652.
9. H. Kazunori, T. Eisuke, N. Yasushi, M. Atsunori, H. Tamejiro, *Bull. Chem. Soc. Jpn.* **1998**, *71*, 2409–2417.
10. R. J. Maya, R. L. Varma, *Chem. Commun.* **2016**, *70*, 10625–10628.
11. S. E. Denmark, J. M. Kallemeyn, *Org. Lett.* **2003**, *5*, 3483–3486.
12. S. E. Denmark, J. D. Baird, *Org. Lett.* **2006**, *8*, 793–795.
13. S. Dayal, J. Li, Y.-S. Li, H. Wu, A. C. S. Samia, M. E. Kenney, C. Burda, *Photochem. Photobiol.* **2008**, *84*, 243–249.
14. M. J. Frisch, G. W. T., H. B. Schlegel, G. E. Scuseria, M. A. Robb, J. R. Cheeseman, G. Scalmani, V. Barone, G. A. Petersson, H. Nakatsuji, X. Li, M. Caricato, A. Marenich, J. Bloino, B. G. Janesko, R. Gomperts, B. Mennucci, H. P. Hratchian, J. V. Ortiz, A. F. Izmaylov, J. L. Sonnenberg, D. Williams-Young, F. Ding, F. Lipparini, F. Egidi, J. Goings,

B. Peng, A. Petrone, T. Henderson, D. Ranasinghe, V. G. Zakrzewski, J. Gao, N. Rega, G. Zheng, W. Liang, M. Hada, M. Ehara, K. Toyota, R. Fukuda, J. Hasegawa, M. Ishida, T. Nakajima, Y. Honda, O. Kitao, H. Nakai, T. Vreven, K. Throssell, J. A. Montgomery, Jr., J. E. Peralta, F. Ogliaro, M. Bearpark, J. J. Heyd, E. Brothers, K. N. Kudin, V. N. Staroverov, T. Keith, R. Kobayashi, J. Normand, K. Raghavachari, A. Rendell, J. C. Burant, S. S. Iyengar, J. Tomasi, M. Cossi, J. M. Millam, M. Klene, C. Adamo, R. Cammi, J. W. Ochterski, R. L. Martin, K. Morokuma, O. Farkas, J. B. Foresman, and D. J. Fox, Gaussian 09, Revision A. 02. Gaussian. Inc.: Wallingford, CT **2009**.

15. a) A. D. Becke, *Phys. Rev. A* **1988**, *38*, 3098–3100; b) A. D. Becke, *J. Chem. Phys.* **1993**, *98*, 5648–5652; c) C. Lee, W. Yang, R. G. Parr, *Phys. Rev. B* **1988**, *37*, 785–789.

16. a) R. F. Ribeiro, A. V. Marenich, C. J. Cramer, D. G. Truhlar, *J. Phys. Chem. B* **2011**, *115*, 14556–14562; b) Y. Zhao, D. G. Truhlar, *Phys. Chem. Chem. Phys.* **2008**, *10*, 2813–2818.

17. Ignacio Funes-Ardoiz & Robert S. Paton. GoodVibes: GoodVibes v1.0.1. (2016). doi:10.5281/zenodo.60811.

18. a) S. Grimme, S. Ehrlich, L. Goerigk, *J. Comput. Chem.* **2011**, *32*, 1456–1465. b) S. Grimme, J. Antony, S. Ehrlich, H. Krieg, *J. Chem. Phys.* **2010**, *132*, 154104.

19. a) V. Barone, M. Cossi, *J. Phys. Chem. A* **1998**, *102*, 1995–2001; b) M. Cossi, N. Rega, G. Scalmani, V. Barone, *J. Comput. Chem.* **2003**, *24*, 669–681.

20. a) C. N. Schutz, A. Warshel, *Proteins* **2001**, *44*, 400–417; b) L. Li, C. Li, Z. Zhang, E. Alexov, *J. Chem. Theory Comp.* **2013**, *9*, 2126–2136.

21. a) A. R. H. Narayan, G. Jiménez-Osés, P. Liu, S. Negretti, W. Zhao, M. M. Gilbert, R. O. Ramabhadran, Y.-F. Yang, L. R. Furan, Z. Li, L. M. Podust, J. Montgomery, K. N. Houk, D. H. Sherman, *Nat. Chem.* **2015**, *7*, 653–660; b) M. M. Gilbert, M. D. DeMars, S. Yang, J. M. Grandner, S. Wang, H. Wang, A. R. H. Narayan, D. H. Sherman, K. N. Houk, J. Montgomery, *ACS Cent. Sci.* **2017**, *3*, 1304–1310; c) S. Shaik, S. Cohen, Y. Wang, H. Chen, D. Kumar, W. Thiel, *Chem. Rev.* **2010**, *110*, 949–1017; d) H. Chen, W. Lai, S. Shaik, *J. Phys. Chem. Lett.* **2010**, *1*, 1533–1540; e) A. Altun, J. Breidung, F. Neese, W. Thiel, *J. Chem. Theory Comp.* **2014**, *10*, 3807–3820.

22. C. Legault, CYLview, 1.0 b, Université de Sherbrooke, Sherbrooke, Québec, Canada, 2009. URL <http://www.cylview.org> (accessed February 1, 2016).

23. a) W. S. Sheldrick in *The Chemistry of Organic Silicon Compounds, Vol. 1* (Eds.: S. Patai, Z. Rapport), Wiley, Chichester, **1989**, pp. 227–303; b) I. V. Alabugin in *Stereoelectronic Effects: A Bridge Between Structure and Reactivity, Vol.1*, John Wiley & Sons, Hoboken, **2016**, 1–392.
